# Supplementary material for: 1,10-Phenanthroline ring-opening mediated by cis-{Re(CO)2} complexes
Source: Royal Society of Chemistry journal article supplement (doi:10.1039/d2qi01890j), 2022-11-30

## ***Electronic Supplementary Information***

### ***1,10-Penanthroline ring-opening mediated by cis- $\{Re(CO)_2\}$ complexes***

Purificación Cañadas, Julio Pérez, Ramón López and Lucía Riera

|                                         |     |
|-----------------------------------------|-----|
| <b>Table of Contents</b>                | S1  |
| Experimental Section                    | S2  |
| Crystal Structure Determination Details | S9  |
| Computational Details                   | S10 |
| References                              | S17 |
| NMR spectra                             | S19 |

## Experimental Section

**General:** All manipulations were carried out under an argon atmosphere using Schlenk techniques. Solvents were distilled from Na (hexane), Na/benzophenone (THF and Et<sub>2</sub>O) and CaH<sub>2</sub> (MeCN and CH<sub>2</sub>Cl<sub>2</sub>). Compounds *fac*-[Re(CO)<sub>3</sub>(N-N)(OTf)] (N-N= bipy, phen) were prepared as previously reported.<sup>1</sup> Deuterated dichloromethane, was stored under nitrogen in a Young tube and used without further purification. <sup>1</sup>H NMR and <sup>13</sup>C NMR spectra were recorded on a Bruker Avance 400, Bruker Avance 300 or DPX-300 spectrometer. NMR spectra are referred to the internal residual solvent peak for <sup>1</sup>H and <sup>13</sup>C{<sup>1</sup>H} NMR. NMR samples were prepared under nitrogen using Kontes manifolds purchased from Aldrich. IR solution spectra were obtained in a Perkin-Elmer FT 1720-X spectrometer using 0.2 mm. CaF<sub>2</sub> cells.

NMR Labelling Schemes:

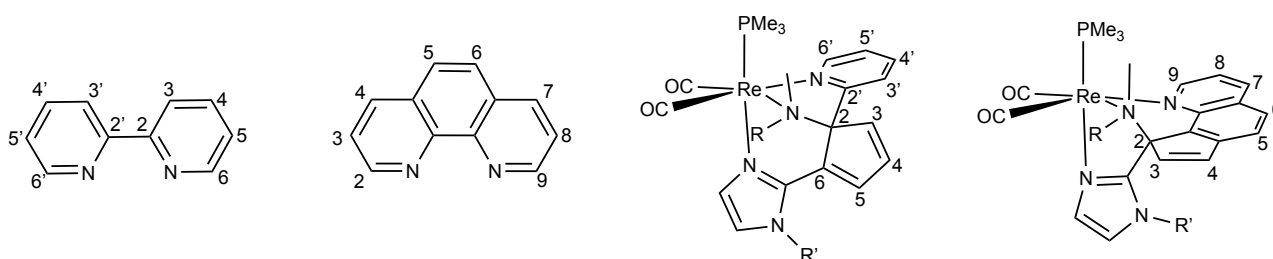

**Synthesis of *fac*-[Re(bipy)(CO)<sub>3</sub>(PMe<sub>3</sub>)]OTf.**<sup>2</sup> PMe<sub>3</sub> (38 μL, 0.43 mmol) was added to a solution of *fac*-[Re(bipy)(CO)<sub>3</sub>(OTf)] (210 mg, 0.36 mmol) in CH<sub>2</sub>Cl<sub>2</sub> (20 mL), and the mixture was stirred at room temperature overnight. Then, the solution was evaporated under reduced pressure to a volume of 5 mL, and addition of hexane (20 mL) caused the precipitation of a yellow solid that was washed with hexane (2 × 20 mL), diethylether (1 × 20 mL) and dried under vacuum. Yield: 220 mg (93 %). IR (CH<sub>2</sub>Cl<sub>2</sub>, cm<sup>-1</sup>): 2038, 1952, 1923 (ν<sub>CO</sub>). <sup>1</sup>H NMR (CD<sub>2</sub>Cl<sub>2</sub>): δ 8.98 [d (*J* = 5.4 Hz), 2H, H<sub>6,6'</sub>], 8.75 [d (*J* = 8.2 Hz), 2H, H<sub>3,3'</sub>], 8.32 [m, 2H, H<sub>4,4'</sub>], 7.72 [m, 2H, H<sub>5,5'</sub>], 1.13 [d (*J*<sub>HP</sub> = 9.0 Hz), 9H, P(CH<sub>3</sub>)<sub>3</sub>]. <sup>13</sup>C{<sup>1</sup>H} NMR (CD<sub>2</sub>Cl<sub>2</sub>): δ 195.0 [d (*J*<sub>CP</sub> = 7.5 Hz), 2CO], 188.4 [d (*J*<sub>CP</sub> = 59.9 Hz), CO], 156.0 [C<sub>2,2'</sub>], 153.6 [C<sub>6,6'</sub>], 141.4 [C<sub>4,4'</sub>], 129.0 [C<sub>5,5'</sub>], 126.1 [C<sub>3,3'</sub>], 13.9 [d (*J*<sub>CP</sub> = 31.9 Hz), P(CH<sub>3</sub>)<sub>3</sub>]. <sup>31</sup>P{<sup>1</sup>H} NMR (CD<sub>2</sub>Cl<sub>2</sub>): -27.8.

**Synthesis of *fac*-[Re(CO)<sub>3</sub>(phen)(PMe<sub>3</sub>)]OTf.**<sup>3</sup> Complex *fac*-[Re(CO)<sub>3</sub>(phen)(PMe<sub>3</sub>)]OTf was prepared as described above for the synthesis of the bipy analog starting from *fac*-[Re(bipy)(CO)<sub>3</sub>(OTf)] (200 mg, 0.33 mmol) and PMe<sub>3</sub> (35 μL, 0.40 mmol). Compound *fac*-[Re(CO)<sub>3</sub>(phen)(PMe<sub>3</sub>)]OTf was obtained as a yellow solid. Yield: 210 mg (95 %). IR (CH<sub>2</sub>Cl<sub>2</sub>, cm<sup>-1</sup>): 2038, 1953, 1926 (ν<sub>CO</sub>). <sup>1</sup>H NMR (CD<sub>2</sub>Cl<sub>2</sub>): δ 9.39 [d (*J* = 4.6 Hz), 2H, H<sub>2,9</sub>], 8.87 [d (*J* = 8.3 Hz), 2H, H<sub>4,7</sub>], 8.27 [s, 2H, H<sub>5,6</sub>], 8.10 [m, 2H, H<sub>3,8</sub>], 1.00 [d (*J*<sub>HP</sub> = 8.4 Hz), 9H, P(CH<sub>3</sub>)<sub>3</sub>]. <sup>13</sup>C{<sup>1</sup>H} NMR (CD<sub>2</sub>Cl<sub>2</sub>): δ 195.1 [d (*J*<sub>CP</sub> = 6.7 Hz), 2CO], 188.4 [d (*J*<sub>CP</sub> = 60.7 Hz), CO], 154.4 [C<sub>2,9</sub>], 146.9, 132.0 [quaternary], 140.4 [C<sub>4,7</sub>], 129.1 [C<sub>5,6</sub>], 127.6 [C<sub>3,8</sub>], 13.8 [d (*J*<sub>CP</sub> = 32.0 Hz), P(CH<sub>3</sub>)<sub>3</sub>]. <sup>31</sup>P{<sup>1</sup>H} NMR (CD<sub>2</sub>Cl<sub>2</sub>): -28.5.

**Synthesis of *cis,trans*-[Re(bipy)(CO)<sub>2</sub>(NCMe)(PMe<sub>3</sub>)]OTf (1).** Me<sub>3</sub>NO·2H<sub>2</sub>O (98 mg, 0.88 mmol) was added to a solution of *fac*-[Re(bipy)(CO)<sub>3</sub>(PMe<sub>3</sub>)]OTf (380 mg, 0.58 mmol) in MeCN (25 mL), and the mixture was refluxed for 5 h. After removal of the solvent under reduced pressure, the residue was purified by column chromatography on silica gel using dichloromethane-acetone (1:1 v/v) as eluent. The resulting orange solution was evaporated to a volume of 5 mL and addition of hexane (20 mL) caused the precipitation of compound **1** as an orange solid, which was washed with diethyl ether (20 mL), and dried under vacuum. Yield: 336 mg (87 %). IR (CH<sub>2</sub>Cl<sub>2</sub>, cm<sup>-1</sup>): 1937, 1863 (ν<sub>CO</sub>). <sup>1</sup>H NMR (CD<sub>2</sub>Cl<sub>2</sub>): δ 8.98 [d (*J*= 5.4 Hz), 2H, H<sub>6,6'</sub>], 8.63 [d (*J*= 8.0 Hz), 2H, H<sub>3,3'</sub>], 8.23 [m, 2H, H<sub>4,4'</sub>], 7.60 [m, 2H, H<sub>5,5'</sub>], 2.16 [s, 3H, NCCH<sub>3</sub>], 1.13 [d (*J*<sub>HP</sub>= 9.2 Hz), 9H, P(CH<sub>3</sub>)<sub>3</sub>]. <sup>13</sup>C{<sup>1</sup>H} NMR (CD<sub>2</sub>Cl<sub>2</sub>): δ 201.7 [d (*J*<sub>CP</sub>= 7.2 Hz), CO], 156.4 [C<sub>2,2'</sub>], 152.7 [C<sub>6,6'</sub>], 140.4 [C<sub>4,4'</sub>], 128.3 [C<sub>5,5'</sub>], 125.1 [C<sub>3,3'</sub>], 123.0 [d (*J*<sub>CP</sub>= 9.7 Hz), NCCH<sub>3</sub>], 17.1 [d (*J*<sub>CP</sub>= 35.6 Hz), P(CH<sub>3</sub>)<sub>3</sub>], 4.2 [NCCH<sub>3</sub>]. <sup>31</sup>P{<sup>1</sup>H} NMR (CD<sub>2</sub>Cl<sub>2</sub>): -21.1. Anal. Calcd. for C<sub>18</sub>H<sub>20</sub>F<sub>3</sub>N<sub>3</sub>O<sub>5</sub>PrES: C 32.53, H 3.03, N 6.32. Found: C 32.49, H 3.10, N 6.20.

**Synthesis of *cis,trans*-[Re(CO)<sub>2</sub>(NCMe)(phen)(PMe<sub>3</sub>)]OTf (2).** Compound **2** was prepared as described above for compound **1**, starting from *fac*-[Re(CO)<sub>3</sub>(phen)(PMe<sub>3</sub>)]OTf (340 mg, 0.50 mmol) and Me<sub>3</sub>NO·2H<sub>2</sub>O (85 mg, 0.76 mmol). Compound **2** was obtained as an orange microcrystalline solid. Yield: 256 mg (74 %). IR (CH<sub>2</sub>Cl<sub>2</sub>, cm<sup>-1</sup>): 1933, 1866 (ν<sub>CO</sub>). <sup>1</sup>H NMR (CD<sub>2</sub>Cl<sub>2</sub>): δ 9.38 [d (*J*= 5.2 Hz), 2H, H<sub>2,9</sub>], 8.77 [d (*J*= 8.0 Hz), 2H, H<sub>4,7</sub>], 8.23 [s, 2H, H<sub>5,6</sub>], 8.01 [dd (*J*= 8.0, 5.2 Hz), 2H, H<sub>3,8</sub>], 2.06 [s, 3H, NCCH<sub>3</sub>], 1.03 [d (*J*<sub>HP</sub>= 9.1 Hz), 9H, P(CH<sub>3</sub>)<sub>3</sub>]. <sup>13</sup>C{<sup>1</sup>H} NMR (CD<sub>2</sub>Cl<sub>2</sub>): δ 201.6 [d (*J*<sub>CP</sub>= 6.7 Hz), CO], 153.2 [C<sub>2,9</sub>], 147.0, 131.4 [quaternary], 139.5 [C<sub>4,7</sub>], 128.5 [C<sub>5,6</sub>], 126.8 [C<sub>3,8</sub>], 123.1 [d (*J*<sub>CP</sub>= 11.2 Hz), NCCH<sub>3</sub>], 17.0 [d (*J*<sub>CP</sub>= 35.9 Hz), P(CH<sub>3</sub>)<sub>3</sub>], 4.1 [NCCH<sub>3</sub>]. <sup>31</sup>P{<sup>1</sup>H} NMR (CD<sub>2</sub>Cl<sub>2</sub>): -21.5. Anal. Calcd. for C<sub>18</sub>H<sub>20</sub>F<sub>3</sub>N<sub>3</sub>O<sub>5</sub>PrES: C 34.88, H 2.93, N 6.10. Found: C 34.96, H 2.88, N 5.91.

**Synthesis of *cis,trans*-[Re(bipy)(CO)<sub>2</sub>(N-Melm)(PMe<sub>3</sub>)]OTf (1a).** N-Melm (38 μL, 0.47 mmol) was added to a solution of *cis,trans*-[Re(bipy)(CO)<sub>2</sub>(NCMe)(PMe<sub>3</sub>)]OTf (**1**) (240 mg, 0.36 mmol) in THF (30 mL), and the mixture was refluxed for 3 h. The solvent was evaporated under reduced pressure to a volume of 5 mL, addition of hexane (20 mL) caused the precipitation of compound **1a** as an orange solid, which was washed with hexane (2 x 20 mL), diethyl ether (2 x 20 mL), and dried under vacuum. Yield: 235 mg (92 %). IR (CH<sub>2</sub>Cl<sub>2</sub>, cm<sup>-1</sup>): 1922, 1817 (ν<sub>CO</sub>). <sup>1</sup>H NMR (CD<sub>2</sub>Cl<sub>2</sub>): δ 9.05 [d (*J*= 5.1 Hz), 2H, H<sub>6,6'</sub>], 8.57 [d (*J*= 8.1 Hz), 2H, H<sub>3,3'</sub>], 8.20 [m, 2H, H<sub>4,4'</sub>], 7.61 [m, 2H, H<sub>5,5'</sub>], 7.23 [s, 1H, NCHN N-Melm], 6.72, 6.45 [s, 1H each, CH N-Melm], 3.55 [s, 3H, CH<sub>3</sub> N-Melm], 1.19 [d (*J*<sub>HP</sub>= 9.0 Hz), 9H, P(CH<sub>3</sub>)<sub>3</sub>]. <sup>13</sup>C{<sup>1</sup>H} NMR (CD<sub>2</sub>Cl<sub>2</sub>): δ 204.4 [CO], 156.0 [C<sub>2,2'</sub>], 152.2 [C<sub>6,6'</sub>], 140.1 [C<sub>4,4'</sub>], 139.9 (NCHN N-Melm), 130.2 (CH N-Melm), 128.2 [C<sub>5,5'</sub>], 125.1 [C<sub>3,3'</sub>], 122.2 (CH N-Melm), 34.7 (CH<sub>3</sub> N-Melm), 17.8 [d (*J*<sub>CP</sub>= 34.5 Hz), P(CH<sub>3</sub>)<sub>3</sub>]. <sup>31</sup>P{<sup>1</sup>H} NMR (CD<sub>2</sub>Cl<sub>2</sub>): -21.2. Anal. Calcd. for C<sub>20</sub>H<sub>23</sub>F<sub>3</sub>N<sub>4</sub>O<sub>5</sub>PrES: C 34.04, H 3.29, N 7.94. Found: C 34.23, H 3.18, N 7.98.

**Synthesis of *cis,trans*-[Re(bipy)(CO)<sub>2</sub>(N-MesIm)(PMe<sub>3</sub>)]OTf (1b).** N-MesIm (67 mg, 0.36 mmol) was added to a solution of *cis,trans*-[Re(bipy)(CO)<sub>2</sub>(NCMe)(PMe<sub>3</sub>)]OTf (**1**) (200 mg, 0.30 mmol) in THF (30 mL), and the mixture was refluxed for 3 h. The solvent was evaporated under reduced pressure to a volume of 5 mL, addition of hexane (20 mL) caused the precipitation of compound **1b** as an orange solid, which was washed with hexane (2 x 20 mL), diethyl ether (2 x 20 mL), and dried under vacuum. Yield: 210 mg (86 %). IR (CH<sub>2</sub>Cl<sub>2</sub>, cm<sup>-1</sup>): 1923, 1849 (ν<sub>CO</sub>). <sup>1</sup>H NMR (CD<sub>2</sub>Cl<sub>2</sub>): δ 9.08 [d (*J* = 4.7 Hz), 2H, H<sub>6,6'</sub>], 8.62 [d (*J* = 8.3 Hz), 2H, H<sub>3,3'</sub>], 8.23 [m, 2H, H<sub>4,4'</sub>], 7.61 [m, 2H, H<sub>5,5'</sub>], 7.24 [s, 1H, NCHN N-MesIm], 6.92 [s, 2H, Mes], 6.72, 6.58 [s, 1H each, CH N-MesIm], 2.28 [s, 3H, CH<sub>3</sub> Mes], 1.69 [s, 6H, CH<sub>3</sub> Mes], 1.24 [d (*J*<sub>HP</sub> = 8.9 Hz), 9H, P(CH<sub>3</sub>)<sub>3</sub>]. <sup>13</sup>C{<sup>1</sup>H} NMR (CD<sub>2</sub>Cl<sub>2</sub>): δ 204.4 [d (*J*<sub>CP</sub> = 7.5 Hz), CO], 156.1 [C<sub>2,2'</sub>], 152.2 [C<sub>6,6'</sub>], 140.5, 135.1, 130.2 [quaternary Mes], 140.4 [C<sub>4,4'</sub>], 139.8 [NCHN N-MesIm], 130.2 (CH N-MesIm), 129.6 (2×CH Mes), 128.4 [C<sub>5,5'</sub>], 125.3 [C<sub>3,3'</sub>], 122.6 [CH N-MesIm], 21.1 [CH<sub>3</sub> Mes], 17.9 [d (*J*<sub>CP</sub> = 34.7 Hz), P(CH<sub>3</sub>)<sub>3</sub>], 17.2 [2×CH<sub>3</sub> Mes]. <sup>31</sup>P{<sup>1</sup>H} NMR (CD<sub>2</sub>Cl<sub>2</sub>): -21.2. Anal. Calcd. for C<sub>28</sub>H<sub>31</sub>F<sub>3</sub>N<sub>4</sub>O<sub>5</sub>PReS: C 41.53, H 3.86, N 6.92. Found: C 41.25, H 3.60, N 6.82.

**Synthesis of *cis,trans*-[Re(CO)<sub>2</sub>(N-Melm)(phen)(PMe<sub>3</sub>)]OTf (2a).** Compound **2a** was prepared as described above for **1a**, starting from *cis,trans*-[Re(CO)<sub>2</sub>(NCMe)(phen)(PMe<sub>3</sub>)]OTf (**2**) (262 mg, 0.38 mmol) and N-Melm (40 μL, 0.49 mmol). Compound **2a** was obtained as an orange solid. Yield: 245 mg (88 %). IR (CH<sub>2</sub>Cl<sub>2</sub>, cm<sup>-1</sup>): 1925, 1850 (ν<sub>CO</sub>). <sup>1</sup>H NMR (CD<sub>2</sub>Cl<sub>2</sub>): δ 9.47 [d (*J* = 5.1 Hz), 2H, H<sub>2,9</sub>], 8.72 [d (*J* = 8.2 Hz), 2H, H<sub>4,7</sub>], 8.17 [s, 2H, H<sub>5,6</sub>], 8.01 [dd (*J* = 8.2, 5.1 Hz), 2H, H<sub>3,8</sub>], 7.27 [s, 1H, NCHN N-Melm], 6.60, 6.28 [s, 1H each, CH N-Melm], 3.46 [s, 3H, CH<sub>3</sub> N-Melm], 1.04 [d (*J*<sub>HP</sub> = 8.9 Hz), 9H, P(CH<sub>3</sub>)<sub>3</sub>]. <sup>13</sup>C{<sup>1</sup>H} NMR (CD<sub>2</sub>Cl<sub>2</sub>): δ 204.4 [CO], 153.0 [C<sub>2,9</sub>], 147.1, 131.5 [quaternary], 140.3 [NCHN N-Melm], 139.4 [C<sub>4,7</sub>], 129.9 [CH N-Melm], 128.8 [C<sub>5,6</sub>], 127.0 [C<sub>3,8</sub>], 122.3 [CH N-Melm], 34.8 [CH<sub>3</sub> N-Melm], 17.9 [d (*J*<sub>CP</sub> = 34.5 Hz), P(CH<sub>3</sub>)<sub>3</sub>]. <sup>31</sup>P{<sup>1</sup>H} NMR (CD<sub>2</sub>Cl<sub>2</sub>): -21.6. Anal. Calcd. for C<sub>22</sub>H<sub>23</sub>F<sub>3</sub>N<sub>4</sub>O<sub>5</sub>PReS: C 36.21, H 3.18, N 7.68. Found: C 36.16, H 2.97, N 7.32.

**Synthesis of *cis,trans*-[Re(CO)<sub>2</sub>(N-MesIm)(phen)(PMe<sub>3</sub>)]OTf (2b).** Compound **2b** was prepared as described above for **1b**, starting from *cis,trans*-[Re(CO)<sub>2</sub>(NCMe)(phen)(PMe<sub>3</sub>)]OTf (**2**) (230 mg, 0.33 mmol) and N-MesIm (81 mg, 0.43 mmol). Compound **2b** was obtained as an orange solid. Yield: 225 mg (82 %). IR (CH<sub>2</sub>Cl<sub>2</sub>, cm<sup>-1</sup>): 1926, 1851 (ν<sub>CO</sub>). <sup>1</sup>H NMR (CD<sub>2</sub>Cl<sub>2</sub>): δ 9.49 [d (*J* = 5.0 Hz), 2H, H<sub>2,9</sub>], 8.76 [d (*J* = 8.2 Hz), 2H, H<sub>4,7</sub>], 8.20 [s, 2H, H<sub>5,6</sub>], 8.01 [dd (*J* = 8.2, 5.0 Hz), 2H, H<sub>3,8</sub>], 7.09 [s, 1H, NCHN N-MesIm], 6.85 [s, 2H, Mes], 6.57, 6.47 [s, 1H each, CH N-MesIm], 2.24 [s, 3H, CH<sub>3</sub> Mes], 1.49 [s, 6H, CH<sub>3</sub> Mes], 1.14 [d (*J*<sub>HP</sub> = 9.0 Hz), 9H, P(CH<sub>3</sub>)<sub>3</sub>]. <sup>13</sup>C{<sup>1</sup>H} NMR (CD<sub>2</sub>Cl<sub>2</sub>): δ 204.2 [d (<sup>2</sup>*J*<sub>CP</sub> = 6.8 Hz), CO], 152.7 [C<sub>2,9</sub>], 146.8, 140.4, 134.9, 131.8, 131.4 [quaternary], 139.5 [NCHN N-MesIm], 139.4 [C<sub>4,7</sub>], 130.1 (CH N-MesIm), 129.5 (2×CH Mes), 128.7 [C<sub>5,6</sub>], 127.0 [C<sub>3,8</sub>], 122.4 [CH N-MesIm], 21.2 [CH<sub>3</sub> Mes], 17.8 [d (*J*<sub>CP</sub> = 34.8 Hz), P(CH<sub>3</sub>)<sub>3</sub>], 17.1 (2×CH<sub>3</sub> Mes). <sup>31</sup>P{<sup>1</sup>H} NMR

(CD<sub>2</sub>Cl<sub>2</sub>): -21.7. Anal. Calcd. for C<sub>30</sub>H<sub>31</sub>F<sub>3</sub>N<sub>4</sub>O<sub>5</sub>PreS: C 43.21, H 3.75, N 6.72. Found: C 43.13, H 3.33, N 6.34.

**Reaction of *cis,trans*-[Re(bipy)(CO)<sub>2</sub>(N-Melm)(PMe<sub>3</sub>)]OTf (1a) with KN(SiMe<sub>3</sub>)<sub>2</sub> and MeOTf (2 eq.). Synthesis of 3a.** KN(SiMe<sub>3</sub>)<sub>2</sub> (0.22 mL of a 0.5 M solution in toluene, 0.11 mmol) was added to a solution of *cis,trans*-[Re(bipy)(CO)<sub>2</sub>(N-Melm)(PMe<sub>3</sub>)]OTf (**1a**) (65 mg, 0.09 mmol) in THF (20 mL) previously cooled to -78 °C. The mixture was allowed to reach room temperature, and after 15-20 min the solvent was evaporated to dryness under reduced pressure. A solution of MeOTf (21 μL, 0.189 mmol) in CH<sub>2</sub>Cl<sub>2</sub> (20 mL) was added to the solid residue, and after 30 min., the mixture was filtered via canula and evaporated to dryness. The resulting brown solid was washed with diethylether (3 × 15 mL) and dried in vacuo. Slow diffusion of hexane (15 mL) into a concentrated solution of **3a** in CH<sub>2</sub>Cl<sub>2</sub> (5 mL) at -20 °C afforded crystals, one of which was used for a solid state structure determination. Yield: 46 mg (68 %). IR (CH<sub>2</sub>Cl<sub>2</sub>, cm<sup>-1</sup>): 1929, 1850 (ν<sub>CO</sub>). <sup>1</sup>H NMR (CD<sub>2</sub>Cl<sub>2</sub>): δ 8.72 [d (*J* = 5.4 Hz), 1H, H<sub>6</sub>'], 7.88 [m, 1H, H<sub>4</sub>'], 7.55 [s, 1H, CH N-Melm], 7.41 [m, 2H, H<sub>3</sub>', H<sub>5</sub>'], 7.26 [m, 1H, H<sub>4</sub>'], 7.04 [s, 1H, CH N-Melm], 6.98, 6.91 [m, 1H each, H<sub>3</sub>, H<sub>5</sub>], 3.82 [s, 3H, CH<sub>3</sub> N-Melm], 3.20 [d (*J*<sub>HP</sub> = 3.5 Hz), 3H, CH<sub>3</sub> NMe<sub>2</sub>], 2.63 [s, 3H, CH<sub>3</sub> NMe<sub>2</sub>], 1.61 [d (*J*<sub>HP</sub> = 8.1 Hz), 9H, P(CH<sub>3</sub>)<sub>3</sub>]. <sup>13</sup>C{<sup>1</sup>H} NMR (CD<sub>2</sub>Cl<sub>2</sub>): δ 204.6 [d (<sup>2</sup>*J*<sub>CP</sub> = 6.9 Hz), CO], 202.2 [d (<sup>2</sup>*J*<sub>CP</sub> = 5.4 Hz), CO], 158.8 [C<sub>2</sub>], 153.5 [C<sub>6</sub>'], 141.1 [C<sub>4</sub>'], 140.7 [C<sub>4</sub>'], 135.8, 126.0 [C<sub>6</sub>, NCN N-Melm], 135.5 [CH N-Melm], 133.9, 131.1 [C<sub>3</sub>, C<sub>5</sub>'], 126.5, 124.0 [C<sub>3</sub>', C<sub>5</sub>'], 126.1 [CH N-Melm], 88.6 [C<sub>2</sub>], 56.5 [d (*J*<sub>CP</sub> = 7.5 Hz), CH<sub>3</sub> NMe<sub>2</sub>], 47.6 [CH<sub>3</sub> NMe<sub>2</sub>], 37.8 [CH<sub>3</sub> N-Melm], 20.5 [d (*J*<sub>CP</sub> = 33.5 Hz), P(CH<sub>3</sub>)<sub>3</sub>]. <sup>31</sup>P{<sup>1</sup>H} NMR (CD<sub>2</sub>Cl<sub>2</sub>): -28.5. Anal. Calcd. for C<sub>22</sub>H<sub>24</sub>F<sub>3</sub>N<sub>4</sub>O<sub>5</sub>PreS: C 36.01, H 3.71, N 7.64. Found: C 35.92, H 3.40, N 7.69.

**Reaction of *cis,trans*-[Re(bipy)(CO)<sub>2</sub>(N-MesIm)(PMe<sub>3</sub>)]OTf (1b) with KN(SiMe<sub>3</sub>)<sub>2</sub> and MeOTf (2 eq.). Synthesis of 3b and 4b.** Following the procedure described for the synthesis of compound **3a**, starting from *cis,trans*-[Re(bipy)(CO)<sub>2</sub>(N-MesIm)(PMe<sub>3</sub>)]OTf (**1b**) (60 mg, 0.074 mmol), KN(SiMe<sub>3</sub>)<sub>2</sub> (0.18 mL of a 0.5 M solution in toluene, 0.089 mmol), and MeOTf (16 μL, 0.148 mmol), a mixture of compounds **3b** and **4b** was obtained. Slow diffusion of hexane (20 mL) into a concentrated solution of the mixture of **3b** and **4b** in CH<sub>2</sub>Cl<sub>2</sub> (5 mL) afforded orange (**3b**) and yellow crystals (**4b**), which could be only partially separated. One of the yellow crystals was employed for the X-ray structure determination of compound **4b**. IR (CH<sub>2</sub>Cl<sub>2</sub>, cm<sup>-1</sup>): 1927, 1849 (ν<sub>CO</sub>). **Compound 3b:** <sup>1</sup>H NMR (CD<sub>2</sub>Cl<sub>2</sub>): δ 8.76 [d (*J* = 5.5 Hz), 1H, H<sub>6</sub>'], 7.86 [m, 1H, H<sub>4</sub>'], 7.77 [s, 1H, CH N-MesIm], 7.42 [m, 1H, H<sub>5</sub>'], 7.34 [m, 1H, H<sub>3</sub>'], 7.08 [s, 1H, Mes], 6.95 [m, 4H, CH N-MesIm, Mes, H<sub>3</sub>, H<sub>4</sub>], 5.48 [m, 1H, H<sub>5</sub>'], 3.22 [d (*J*<sub>HP</sub> = 3.4 Hz), 3H, CH<sub>3</sub> NMe<sub>2</sub>], 2.64 [s, 3H, CH<sub>3</sub> NMe<sub>2</sub>], 2.35, 2.00 [s, 3H each, CH<sub>3</sub> Mes], 1.64 [d (*J*<sub>HP</sub> = 8.4 Hz), 9H, P(CH<sub>3</sub>)<sub>3</sub>], 1.24 [s, 3H, CH<sub>3</sub> Mes]. <sup>13</sup>C{<sup>1</sup>H} NMR (CD<sub>2</sub>Cl<sub>2</sub>): δ 204.6 [d (*J*<sub>CP</sub> = 5.5 Hz), CO], 202.1 [d (*J*<sub>CP</sub> = 4.7 Hz), CO], 158.9 [C<sub>2</sub>], 153.5 [C<sub>6</sub>'], 141.4, 139.9, 135.8, 134.8, 134.3, 132.9, [quaternary], 141.0 [C<sub>3</sub>'], 140.7 [C<sub>4</sub>'], 136.9 [CH N-MesIm], 130.7 [C<sub>5</sub>'], 130.1, 129.6 [CH Mes], 126.5 [C<sub>5</sub>'], 124.3 [C<sub>3</sub>'], 123.3 [CH N-MesIm], 88.5 [C<sub>2</sub>], 56.6 [d (*J*<sub>CP</sub> = 7.2 Hz), CH<sub>3</sub> NMe<sub>2</sub>], 47.7 [CH<sub>3</sub>

NMe<sub>2</sub>], 21.3 [CH<sub>3</sub> N-MesIm], 20.5 [d ( $J_{CP}$  = 33.9 Hz), P(CH<sub>3</sub>)<sub>3</sub>], 17.9, 16.6 [CH<sub>3</sub> N-MesIm]. <sup>31</sup>P{<sup>1</sup>H} NMR (CD<sub>2</sub>Cl<sub>2</sub>): -28.4. **Compound 4b**: <sup>1</sup>H NMR (CD<sub>2</sub>Cl<sub>2</sub>): δ 8.73 [d ( $J$  = 5.4 Hz), 1H, H<sub>6</sub>], 7.73 [m, 1H, H<sub>4</sub>], 7.69 [s, 1H, CH N-MesIm], 7.28 [m, 1H, H<sub>5</sub>], 7.22 [d ( $J$  = 5.4 Hz), 1H, H<sub>3</sub>], 7.19 [d ( $J$  = 8.3 Hz), 1H, H<sub>3</sub>], 7.08, 6.95 [s, 1H each, Mes], 6.90 [s, 1H, CH N-MesIm], 6.73 [s, 1H, H<sub>4</sub>], 6.09 (s<sub>br</sub>, 1H, NH], 5.48 [m, 1H, H<sub>5</sub>], 2.56 [d ( $J$  = 5.9 Hz), 3H, N(H)(CH<sub>3</sub>)], 2.64 [s, 3H, CH<sub>3</sub> NMe<sub>2</sub>], 2.35, 2.00 [s, 3H each, CH<sub>3</sub> Mes], 1.64 [d ( $J_{HP}$  = 8.4 Hz), 9H, P(CH<sub>3</sub>)<sub>3</sub>], 1.28 [s, 3H, CH<sub>3</sub> Mes]. <sup>13</sup>C{<sup>1</sup>H} NMR (CD<sub>2</sub>Cl<sub>2</sub>): δ 205.1 [d ( $J_{CP}$  = 7.8 Hz), CO], 202.8 [d ( $J_{CP}$  = 6.3 Hz), CO], 159.9 [C<sub>2</sub>], 153.1 [C<sub>6</sub>], 141.1, 135.3, 134.9, 134.1, 133.2, 119.0 [quaternary], 140.3 [C<sub>3</sub>], 139.7 [C<sub>4</sub>], 138.1 [C<sub>4</sub>], 137.1 [CH N-MesIm], 131.1 [C<sub>5</sub>], 130.4, 130.3 [CH Mes], 125.5 [C<sub>5</sub>], 123.6 [CH N-MesIm], 122.3 [C<sub>3</sub>], 83.4 [C<sub>2</sub>], 36.2 [N(H)(CH<sub>3</sub>)], 21.3 [CH<sub>3</sub> N-MesIm], 18.7 [d ( $J_{CP}$  = 34.4 Hz), P(CH<sub>3</sub>)<sub>3</sub>], 17.8, 16.5 [CH<sub>3</sub> N-MesIm]. <sup>31</sup>P{<sup>1</sup>H} NMR (CD<sub>2</sub>Cl<sub>2</sub>): -20.8.

**Reaction of *cis,trans*-[Re(CO)<sub>2</sub>(N-Melm)(phen)(PMe<sub>3</sub>)]OTf (2a) with KN(SiMe<sub>3</sub>)<sub>2</sub> and MeOTf (2 eq.).** **Synthesis of 5a and 6a.** KN(SiMe<sub>3</sub>)<sub>2</sub> (0.15 mL of a 0.5 M solution in toluene, 0.075 mmol) was added to a solution of *cis,trans*-[Re(CO)<sub>2</sub>(N-Melm)(phen)(PMe<sub>3</sub>)]OTf (**2a**) (45 mg, 0.062 mmol) in THF (25 mL) previously cooled to -78 °C. The mixture was allowed to reach room temperature, and after 20 min the solvent was evaporated to dryness under reduced pressure. A solution of MeOTf (17 μL, 0.15 mmol) in CH<sub>2</sub>Cl<sub>2</sub> (15 mL) was added to the residue and stirred for 30 min. The resulting slurry was then filtered via canula, concentrated under vacuum to a volume of 5 mL, and the addition of hexane (20 mL) caused the precipitation of a brown solid, which was washed with hexane (2 x 20 mL) and dried under vacuum. Slow diffusion of hexane (10 mL) into a concentrated solution in CH<sub>2</sub>Cl<sub>2</sub> (5 mL) at room temperature, afforded orange crystals of **5a**, one of which was used for a solid-state structure determination by X-ray diffraction. Crystallization of the mother liquor by slow diffusion of hexane (15 mL) into a concentrated solution in CH<sub>2</sub>Cl<sub>2</sub> (5 mL) at -20 °C, afforded orange crystals of **6a**.

**Compound 5a**: Yield: 17 mg (36 %). IR (CH<sub>2</sub>Cl<sub>2</sub>, cm<sup>-1</sup>): 1930, 1848 (ν<sub>CO</sub>). <sup>1</sup>H NMR (CD<sub>2</sub>Cl<sub>2</sub>): δ 9.42 [dd ( $J$  = 5.3, 1.5 Hz), 1H, H<sub>9</sub>], 8.49 [dd ( $J$  = 8.3, 1.5 Hz), 1H, H<sub>7</sub>], 8.13, 7.82 [d ( $J$  = 8.3 Hz), 1H each, H<sub>5</sub> and H<sub>6</sub>], 7.69 [d ( $J$  = 5.8 Hz), 1H, H<sub>3</sub>/H<sub>4</sub>], 7.45 [dd ( $J$  = 8.3, 5.3 Hz), 1H, H<sub>8</sub>], 7.34 [s, 1H, CH N-Melm], 7.19 [d ( $J$  = 5.8 Hz), 1H, H<sub>3</sub>/H<sub>4</sub>], 6.84 [d ( $J$  = 1.2 Hz), 1H, CH N-Melm], 3.53 [s, 3H, CH<sub>3</sub> N-Melm], 3.29 [s, 3H, CH<sub>3</sub> NMe<sub>2</sub>], 2.56 [d ( $J_{HP}$  = 1.9 Hz), 3H, CH<sub>3</sub> NMe<sub>2</sub>], 1.51 [d ( $J_{HP}$  = 8.2 Hz), 9H, P(CH<sub>3</sub>)<sub>3</sub>]. <sup>13</sup>C{<sup>1</sup>H} NMR (CD<sub>2</sub>Cl<sub>2</sub>): δ 159.0 [C<sub>9</sub>], 144.5, 141.2, 130.1, 115.8, 115.4 [quaternary], 142.0 [C<sub>3</sub>/C<sub>4</sub>], 141.3 [C<sub>7</sub>], 134.2 [C<sub>5</sub>/C<sub>6</sub>], 132.6 [C<sub>3</sub>/C<sub>4</sub>], 131.3, 126.0 [CH N-Melm], 124.2 [C<sub>5</sub>/C<sub>6</sub>], 122.2 [C<sub>8</sub>], 81.2 [C<sub>2</sub>], 55.4 [CH<sub>3</sub> NMe<sub>2</sub>], 45.7 [d ( $J_{CP}$  = 2.9 Hz), CH<sub>3</sub> NMe<sub>2</sub>], 36.8 [CH<sub>3</sub> N-Melm], 19.6 [d ( $J_{CP}$  = 33.4 Hz), P(CH<sub>3</sub>)<sub>3</sub>]. Unfortunately, the signals corresponding to the CO ligands are not observed, probably due to their low intensity, and to the low solubility of compound **5a** in CD<sub>2</sub>Cl<sub>2</sub>. <sup>31</sup>P{<sup>1</sup>H} NMR (CD<sub>2</sub>Cl<sub>2</sub>): -23.4. Anal. Calcd. for C<sub>24</sub>H<sub>27</sub>F<sub>3</sub>N<sub>4</sub>O<sub>5</sub>PReS: C 38.04, H 3.59, N 7.39. Found: C 39.18, H 3.67, N 7.18.

**Compound 6a**: Yield: 14 mg (31 %). IR (CH<sub>2</sub>Cl<sub>2</sub>, cm<sup>-1</sup>): 1917, 1835 (ν<sub>CO</sub>). <sup>1</sup>H NMR (CD<sub>2</sub>Cl<sub>2</sub>): δ 9.68 [d ( $J$  = 5.2 Hz), 1H, H<sub>9</sub>], 8.35 [dd ( $J$  = 8.3, 1.7 Hz), 1H, H<sub>7</sub>], 8.04 [d ( $J$  = 8.2 Hz), 1H, H<sub>5</sub>/H<sub>6</sub>], 7.71 [d ( $J$  =

8.2 Hz), 1H, H<sub>5</sub>/H<sub>6</sub>], 7.59 [d (*J* = 5.7 Hz), 1H, H<sub>3</sub>/H<sub>4</sub>], 7.40 [d (*J* = 5.7 Hz), 1H, H<sub>3</sub>/H<sub>4</sub>], 7.33 [dd (*J* = 8.3, 5.2 Hz), 1H, H<sub>8</sub>], 7.07, 6.72 [d (*J* = 1.6 Hz), 1H each, *CH* N-Melm], 6.11 [*s*<sub>br</sub>, 1H, *NH*], 3.51 [*s*, 3H, *CH*<sub>3</sub> N-Melm], 2.51 [d (*J* = 5.9 Hz), 3H, N(H)(*CH*<sub>3</sub>)], 1.65 [d (*J*<sub>HP</sub> = 9.2 Hz), 9H, P(*CH*<sub>3</sub>)<sub>3</sub>]. <sup>13</sup>C{<sup>1</sup>H} NMR (CD<sub>2</sub>Cl<sub>2</sub>): δ 205.9 [d (*J*<sub>CP</sub> = 8.1 Hz), CO], 202.7 [d (*J*<sub>CP</sub> = 7.2 Hz), CO], 161.1 [C<sub>9</sub>], 149.3, 145.2, 142.1, 133.8, 129.6 [quaternary], 139.3, 139.2, 138.6 [C<sub>7</sub>, C<sub>3</sub> and C<sub>4</sub>], 133.4 [C<sub>5</sub>/C<sub>6</sub>], 129.2, 125.0 [CH N-Melm], 123.2 [C<sub>5</sub>/C<sub>6</sub>], 122.1 [C<sub>8</sub>], 75.0 [C<sub>2</sub>], 36.4 [CH<sub>3</sub> N-Melm], 35.2 [N(H)(*CH*<sub>3</sub>)], 18.6 [d (*J*<sub>CP</sub> = 34.7 Hz), P(*CH*<sub>3</sub>)<sub>3</sub>]. <sup>31</sup>P{<sup>1</sup>H} NMR (CD<sub>2</sub>Cl<sub>2</sub>): -18.5. Anal. Calcd. for C<sub>23</sub>H<sub>25</sub>F<sub>3</sub>N<sub>4</sub>O<sub>5</sub>PrReS·0.25hex: C 38.45, H 3.75, N 7.32. Found: C 38.81, H 3.34, N 7.14.

**Reaction of *cis,trans*-[Re(CO)<sub>2</sub>(N-Melm)(phen)(PMe<sub>3</sub>)]OTf (2a) with KN(SiMe<sub>3</sub>)<sub>2</sub> and Mel (2 eq.).**

**Synthesis of 5a/l.** KN(SiMe<sub>3</sub>)<sub>2</sub> (0.13 mL of a 0.5 M solution in toluene, 0.065 mmol) was added to a solution of *cis,trans*-[Re(CO)<sub>2</sub>(N-Melm)(phen)(PMe<sub>3</sub>)]OTf (2a) (40 mg, 0.055 mmol) in THF (25 mL) previously cooled to -78 °C. The mixture was allowed to reach room temperature, and after 20 min the solvent was evaporated to dryness under reduced pressure. A solution of freshly passes through alumina Mel (7 μL, 0.11 mmol) in CH<sub>2</sub>Cl<sub>2</sub> (15 mL) was added to the residue and stirred overnight. The resulting slurry was then filtered via canula, concentrated under vacuum to a volume of 5 mL, and the addition of hexane (20 mL) caused the precipitation of a brown solid, which was washed with hexane (2 x 20 mL) and dried under vacuum. Compound 5a/l was obtained as a brown solid. Yield: 18 mg (45 %). IR (CH<sub>2</sub>Cl<sub>2</sub>, cm<sup>-1</sup>): 1927, 1846 (ν<sub>CO</sub>). <sup>1</sup>H NMR (CD<sub>2</sub>Cl<sub>2</sub>): δ 9.42 [d (*J* = 4.9 Hz), 1H, H<sub>9</sub>], 8.54 [dd (*J* = 8.1 Hz), 1H, H<sub>7</sub>], 8.16, 7.85 [d (*J* = 8.4 Hz), 1H each, H<sub>5</sub> and H<sub>6</sub>], 7.74 [d (*J* = 5.7 Hz), 1H, H<sub>3</sub>/H<sub>4</sub>], 7.48 [m, 1H, H<sub>8</sub>], 7.35 [d (*J* = 5.7 Hz), 1H, H<sub>3</sub>/H<sub>4</sub>], 7.32, 6.89 [*s*, 1H each, *CH* N-Melm], 3.58 [*s*, 3H, *CH*<sub>3</sub> N-Melm], 3.31 [*s*, 3H, *CH*<sub>3</sub> NMe<sub>2</sub>], 2.55 [d (*J*<sub>HP</sub> = 1.7 Hz), 3H, *CH*<sub>3</sub> NMe<sub>2</sub>], 1.51 [d (*J*<sub>HP</sub> = 5.2 Hz), 9H, P(*CH*<sub>3</sub>)<sub>3</sub>]. <sup>13</sup>C{<sup>1</sup>H} NMR (CD<sub>2</sub>Cl<sub>2</sub>): δ 158.9 [C<sub>9</sub>], 146.3, 144.5, 141.1, 135.2, 130.1 [quaternary], 142.0 [C<sub>3</sub>/C<sub>4</sub>], 141.3 [C<sub>7</sub>], 134.1 [C<sub>5</sub>/C<sub>6</sub>], 133.1 [C<sub>3</sub>/C<sub>4</sub>], 131.2, 126.1 [CH N-Melm], 124.2 [C<sub>8</sub>], [C<sub>5</sub>/C<sub>6</sub>], 122.2, 81.1 [C<sub>2</sub>], 55.7 [CH<sub>3</sub> NMe<sub>2</sub>], 45.7 [d (*J*<sub>CP</sub> = 2.6 Hz), CH<sub>3</sub> NMe<sub>2</sub>], 37.1 [CH<sub>3</sub> N-Melm], 19.6 [d (*J*<sub>CP</sub> = 33.5 Hz), P(*CH*<sub>3</sub>)<sub>3</sub>]. Unfortunately, the signals corresponding to the CO ligands are not observed, probably due to their low intensity, and to the low solubility of compound 5a/l in CD<sub>2</sub>Cl<sub>2</sub>. <sup>31</sup>P{<sup>1</sup>H} NMR (CD<sub>2</sub>Cl<sub>2</sub>): -22.8.

**Reaction of *cis,trans*-[Re(CO)<sub>2</sub>(N-MesIm)(phen)(PMe<sub>3</sub>)]OTf (2b) with KN(SiMe<sub>3</sub>)<sub>2</sub> and MeOTf (2 eq.).**

**Synthesis of 5b.** KN(SiMe<sub>3</sub>)<sub>2</sub> (0.13 mL of a 0.5 M solution in toluene, 0.065 mmol) was added to a solution of *cis,trans*-[Re(CO)<sub>2</sub>(N-Melm)(phen)(PMe<sub>3</sub>)]OTf (2a) (45 mg, 0.054 mmol) in THF (25 mL) previously cooled to -78 °C. The mixture was allowed to reach room temperature, and after 30 min the solvent was evaporated to dryness under reduced pressure. A solution of MeOTf (12 μL, 0.11 mmol) in CH<sub>2</sub>Cl<sub>2</sub> (15 mL) was added to the residue and stirred for 30 min. The resulting slurry was then filtered via canula, concentrated under vacuum to a volume of 5 mL, and the addition of hexane (20 mL) caused the precipitation of a brown solid, which was washed with diethyl ether (2 x

20 mL) and dried under vacuum. Slow diffusion of hexane (10 mL) into a concentrated solution in  $\text{CH}_2\text{Cl}_2$  (5 mL) at room temperature, afforded light red crystals of **5b**, one of which was used for a solid-state structure determination by X-ray diffraction. Yield: 25 mg (57 %). IR ( $\text{CH}_2\text{Cl}_2$ ,  $\text{cm}^{-1}$ ): 1930, 1849 ( $\nu_{\text{CO}}$ ).  $^1\text{H}$  NMR ( $\text{CD}_2\text{Cl}_2$ ):  $\delta$  9.47 [d ( $J= 5.2$  Hz), 1H,  $\text{H}_9$ ], 8.54 [d ( $J= 8.1$  Hz), 1H,  $\text{H}_7$ ], 8.14, 7.65 [d ( $J= 8.3$  Hz), 1H each,  $\text{H}_5$  and  $\text{H}_6$ ], 7.57 [s, 1H, *CH* N-MesIm], 7.50 [dd ( $J= 8.1, 5.2$  Hz), 1H,  $\text{H}_8$ ], 7.04 [s, 1H, Mes], 6.85 [s, 1H, *CH* N-MesIm], 6.78 [m, 2H,  $\text{H}_3/\text{H}_4$  and Mes], 6.23 [d ( $J= 5.7$  Hz), 1H,  $\text{H}_3/\text{H}_4$ ], 3.30 [s, 3H,  $\text{CH}_3\text{NMe}_2$ ], 2.51 [s<sub>br</sub>, 3H,  $\text{CH}_3\text{NMe}_2$ ], 2.35, 2.13 (s, 3H each,  $\text{CH}_3$  Mes), 1.54 (d ( $J_{\text{HP}}= 8.4$  Hz), 9H,  $\text{P}(\text{CH}_3)_3$ ), 0.64 (s, 3H,  $\text{CH}_3$  Mes).  $^{13}\text{C}\{^1\text{H}\}$  NMR ( $\text{CD}_2\text{Cl}_2$ ):  $\delta$  207.3 [d ( $J_{\text{CP}}= 6.4$  Hz), CO], 159.2 [ $\text{C}_9$ ], 145.1, 141.4, 140.9, 135.9, 134.3, 131.9, 130.4, 129.9, 126.2 [quaternary], 141.6 [ $\text{C}_7$ ], 139.8 [Mes], 134.5 [ $\text{C}_5/\text{C}_6$ ], 132.7 [*CH* N-MesIm], 130.1, 129.7, 129.5 [Mes,  $\text{C}_3, \text{C}_4$ ], 124.8 [*CH* N-MesIm], 123.7 [ $\text{C}_5/\text{C}_6$ ], 122.3 [ $\text{C}_8$ ], 80.7 [ $\text{C}_2$ ], 55.1 [ $\text{CH}_3\text{NMe}_2$ ], 45.7 [d ( $J_{\text{CP}}= 2.9$  Hz),  $\text{CH}_3\text{NMe}_2$ ], 21.3 [ $\text{CH}_3$  Mes], 19.5 [d ( $J_{\text{CP}}= 33.6$  Hz),  $\text{P}(\text{CH}_3)_3$ ], 18.2, 16.1 [ $\text{CH}_3$  Mes]. Unfortunately, the signals corresponding to one of the CO ligands is not observed, probably due to its low intensity, and to the low solubility of compound **5b** in  $\text{CD}_2\text{Cl}_2$ .  $^{31}\text{P}\{^1\text{H}\}$  NMR ( $\text{CD}_2\text{Cl}_2$ ): -23.3. Anal. Calcd. for  $\text{C}_{32}\text{H}_{35}\text{F}_3\text{N}_4\text{O}_5\text{PReS}$ : C 44.59, H 4.09, N 6.50. Found: C 44.46, H 3.92, N 6.25.

**Reaction of *cis,trans*-[Re(CO)<sub>2</sub>(N-MesIm)(phen)(PMe<sub>3</sub>)]OTf (**2b**) with KN(SiMe<sub>3</sub>)<sub>2</sub> and MeI (2 eq.). Synthesis of **5b/I**.** Following the procedure described for the synthesis of compound **5a/I**, starting from *cis,trans*-[Re(CO)<sub>2</sub>(N-MesIm)(phen)(PMe<sub>3</sub>)]OTf (**1b**) (40 mg, 0.048 mmol), KN(SiMe<sub>3</sub>)<sub>2</sub> (0.12 mL of a 0.5 M solution in toluene, 0.060 mmol), and MeI (6  $\mu\text{L}$ , 0.096 mmol), allowed the isolation of compound **5b/I** as a brown solid. Yield: 21 mg (52 %). IR ( $\text{CH}_2\text{Cl}_2$ ,  $\text{cm}^{-1}$ ): 1930, 1849 ( $\nu_{\text{CO}}$ ).  $^1\text{H}$  NMR ( $\text{CD}_2\text{Cl}_2$ ):  $\delta$  9.48 [d ( $J= 5.2$  Hz), 1H,  $\text{H}_9$ ], 8.59 [d ( $J= 8.3$  Hz), 1H,  $\text{H}_7$ ], 8.18, 7.66 [d ( $J= 8.3$  Hz), 1H each,  $\text{H}_5$  and  $\text{H}_6$ ], 7.56 [s, 1H, *CH* N-MesIm], 7.53 [m, 1H,  $\text{H}_8$ ], 7.04 [s, 1H, Mes], 6.86 [s, 1H, *CH* N-MesIm], 6.81 [d ( $J= 5.8$  Hz), 1H,  $\text{H}_3/\text{H}_4$ ], 6.76 [s, 1H, Mes], 6.26 [d ( $J= 5.8$  Hz), 1H,  $\text{H}_3/\text{H}_4$ ], 3.32 [s, 3H,  $\text{CH}_3\text{NMe}_2$ ], 2.53 [d ( $J_{\text{HP}}= 2.0$  Hz), 3H,  $\text{CH}_3\text{NMe}_2$ ], 2.35, 2.13 (s, 3H each,  $\text{CH}_3$  Mes), 1.55 (d ( $J_{\text{HP}}= 8.2$  Hz), 9H,  $\text{P}(\text{CH}_3)_3$ ), 0.65 (s, 3H,  $\text{CH}_3$  Mes).  $^{13}\text{C}\{^1\text{H}\}$  NMR ( $\text{CD}_2\text{Cl}_2$ ):  $\delta$  202.2, 201.5 [CO], 159.3 [ $\text{C}_9$ ], 147.5, 145.1, 141.4, 140.9, 137.7, 137.1, 135.9, 135.7, 120.5 [quaternary], 141.7 [ $\text{C}_7$ ], 139.8 [ $\text{C}_3/\text{C}_4$ ], 134.5 [ $\text{C}_5/\text{C}_6$ ], 134.5 [ $\text{C}_5/\text{C}_6$ ], 132.6 [*CH* N-MesIm], 30.1 [ $\text{C}_3/\text{C}_4$ ], 129.9, 129.5 [Mes], 124.8 [*CH* N-MesIm], 123.7 [ $\text{C}_5/\text{C}_6$ ], 122.4 [ $\text{C}_8$ ], 80.8 [ $\text{C}_2$ ], 55.2 [ $\text{CH}_3\text{NMe}_2$ ], 45.8 [d ( $J_{\text{CP}}= 2.8$  Hz),  $\text{CH}_3\text{NMe}_2$ ], 21.2 [ $\text{CH}_3$  Mes], 19.5 [d ( $J_{\text{CP}}= 33.9$  Hz),  $\text{P}(\text{CH}_3)_3$ ], 18.0, 16.1 [ $\text{CH}_3$  Mes].  $^{31}\text{P}\{^1\text{H}\}$  NMR ( $\text{CD}_2\text{Cl}_2$ ): -23.4.



### **X-ray structures of 3a, 4b, 5a, 5b and 6a.**

**General Description:** For compounds **3a** and **4b**: data collection was performed on a Bruker APPEX II diffractometer using graphite-monochromated Mo K $\alpha$  radiation ( $\lambda = 0.71073 \text{ \AA}$ ) from a fine-focus sealed tube source at 100 K. Computing data and reduction were made with the APPEX II software.<sup>4</sup> In all cases empirical absorption corrections were applied using SADABS.<sup>5</sup> For compounds **5a**, **5b** and **6a**: Crystal data were collected on an Oxford Diffraction Xcalibur Nova single crystal diffractometer, using Cu-K $\alpha$  radiation ( $\lambda = 1.5418 \text{ \AA}$ ). Images were collected at a 65 mm fixed crystal-detector distance, using the oscillation method, with 1 $^\circ$  oscillation and variable exposure time per image (4-16 s). Data collection strategy was calculated with the program CrysAlis<sup>Pro</sup> CCD.<sup>6</sup> Data reduction and cell refinement was performed with the program CrysAlis<sup>Pro</sup> RED.<sup>6</sup> An empirical absorption correction was applied using the SCALE3 ABSPACK.<sup>6</sup> Using the program suite WINGX,<sup>7</sup> the structures were solved by Patterson interpretation and phase expansion using SHELXL and refined with full-matrix least squares on F<sup>2</sup> using SHELXL.<sup>8</sup> In general, all non-hydrogen atoms were refined anisotropically, and all hydrogen atoms were geometrically placed and refined using a riding mode. Molecular graphics were made with ORTEP 3.<sup>9</sup>

## Computational Details

The geometry and energy of the two possible ring-opening product complexes for bipy and phen were optimized in CH<sub>2</sub>Cl<sub>2</sub> solution from the outset with the Conductor-like Polarizable Continuum Model<sup>10</sup> (CPCM) and the Universal Force Field<sup>11</sup> (UFF) radii in conjunction with the hybrid density functional B3LYP<sup>12</sup> and the 6-31+G(d) basis set for nonmetal atoms<sup>13</sup> together with the valence double- $\zeta$  basis set LANL2DZ plus the effective core potential of Hay and Wadt for the Re atom,<sup>14</sup> and by using a modified Schlegel algorithm.<sup>15</sup> Electrostatic, cavitation, dispersion, and repulsion terms<sup>16</sup> were considered in the CPCM computations, wherein a relative permittivity of 8.93 was assumed to simulate CH<sub>2</sub>Cl<sub>2</sub> as the solvent experimentally used. The nature of the stationary points was confirmed by analytical computations of harmonic vibrational frequencies. Gibbs free energies in CH<sub>2</sub>Cl<sub>2</sub> solution ( $\Delta G$ ) were also calculated within the ideal gas, rigid rotor, and harmonic oscillator approximations at a pressure of 1 atm and a temperature of 298.15 K.<sup>17</sup> The calculation of thermodynamic magnitudes in solution starting with molecular partition functions developed for computing gas-phase thermodynamics properties is a standard procedure that has proven to be a correct and useful approach.<sup>18</sup> For interpretation purposes a natural bond order (NBO) analysis<sup>19</sup> in conjunction with a topological analysis of the electron density based on the Atoms-in-Molecules (AIM) theory of Bader<sup>20</sup> were performed. Besides, using the Gauge-independent atomic orbital (GIAO) method<sup>21</sup> at the above-mentioned theory level, nucleus-independent chemical shifts (NICS)<sup>22</sup> were also calculated at the ring critical point (RCP) located at the center of relevant rings, NICS(0), as well as 1.0 Å above these RCP, NICS(1), as aromaticity indexes. The latter, NICS(1), were recommended as a better measure of the  $\pi$  electron delocalization as compared to the former, NICS(0).<sup>23</sup> Thus, in the present work, we only discuss NICS(1) values.

The computational protocol used in this work is equal or similar to those employed in related investigations on related carbonyl Re(I) complexes.<sup>24</sup> All the quantum chemical calculations were performed with the Gaussian 09 (G09) suite of programs.<sup>25</sup>

**Table S1.** Wiberg bond index in the natural atomic orbital basis obtained for the bond distances between Re and the two carbonyl carbons, the pyridine nitrogen (N<sub>py</sub>), the dimethylated nitrogen (N<sub>Me</sub>), the imidazole nitrogen directly linked to Re (N<sub>im</sub>) and the phosphorous atom (P) in the two possible ring-opening products for the bipy case at the CPCM-B3LYP/6-31+G(d)-LANL2DZ level of theory.

| Species                 | Re-CO  | Re-CO  | Re-N <sub>py</sub> | Re-N <sub>Me</sub> | Re-N <sub>im</sub> | Re-P   |
|-------------------------|--------|--------|--------------------|--------------------|--------------------|--------|
| I_bipy_NC <sub>py</sub> | 1.4811 | 1.4338 | 0.4686             | 0.3824             | 0.5019             | 0.8201 |
| I_bipy_NC <sub>im</sub> | 1.4828 | 1.4638 | 0.4340             | 0.3761             | 0.5147             | 0.8144 |

**Table S2.** CPCM-B3LYP/6-31+G(d)-LANL2DZ absolute and relative energies in CH<sub>2</sub>Cl<sub>2</sub> solution without and with including thermal corrections (E and G, in hartree, and ΔE and ΔG, in kcal/mol, respectively) of the two possible ring-opening products for bipy and phen.

| Species                 | E            | G            | ΔE    | ΔG    |
|-------------------------|--------------|--------------|-------|-------|
| I_bipy_NC <sub>py</sub> | -1606.373371 | -1605.974930 | 0.0   | 0.0   |
| I_bipy_NC <sub>im</sub> | -1606.364898 | -1605.967041 | 5.3   | 5.0   |
| I_phen_NC <sub>py</sub> | -1682.609352 | -1682.197761 | 0.0   | 0.0   |
| I_phen_NC <sub>im</sub> | -1682.569475 | -1682.158755 | -25.0 | -24.5 |

**Table S3.** Electron density ( $\rho(r)$ ,  $e/\text{\AA}^3$ ) and its Laplacian of the electron density ( $\nabla^2\rho(r)$ ,  $e/\text{\AA}^5$ ) at some relevant ring critical points (1-3/4) located in the two possible ring-opening products for bipy and phen.

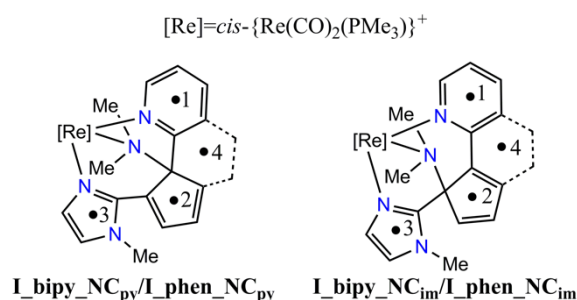

| Species                 | Ring 1    |                   | Ring 2    |                   | Ring 3    |                   | Ring 4    |                   |
|-------------------------|-----------|-------------------|-----------|-------------------|-----------|-------------------|-----------|-------------------|
|                         | $\rho(r)$ | $\nabla^2\rho(r)$ | $\rho(r)$ | $\nabla^2\rho(r)$ | $\rho(r)$ | $\nabla^2\rho(r)$ | $\rho(r)$ | $\nabla^2\rho(r)$ |
| I_bipy_NC <sub>py</sub> | 0.0220    | 0.1720            | 0.0466    | 0.3119            | 0.0519    | 0.4158            |           |                   |
| I_bipy_NC <sub>im</sub> | 0.0219    | 0.1692            | 0.0436    | 0.3140            | 0.0527    | 0.4209            |           |                   |
| I_phen_NC <sub>py</sub> | 0.0219    | 0.1708            | 0.0428    | 0.3077            | 0.0519    | 0.4162            | 0.0182    | 0.1281            |
| I_phen_NC <sub>im</sub> | 0.0213    | 0.1615            | 0.0428    | 0.3085            | 0.0527    | 0.4207            | 0.0199    | 0.1517            |

**Table S4.** B3LYP/6-311+G(d,p)-LANL2DZ nucleus-independent chemical shifts (NICS) (in ppm) calculated at the ring critical points located at the center of the rings 1-3/4, NICS(0), and at points 1.0 Å above them, NICS(1), for the two possible ring-opening products for bipy and phen.

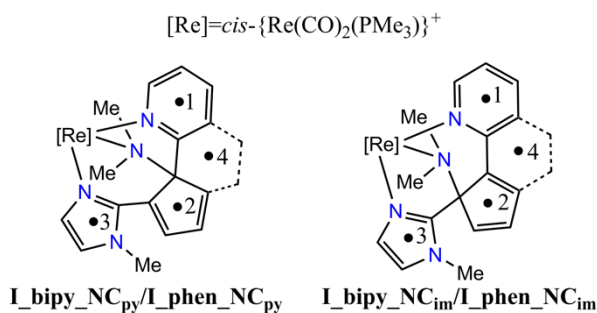

| Species                 | Ring 1  |         | Ring 2  |         | Ring 3  |         | Ring 4  |         |
|-------------------------|---------|---------|---------|---------|---------|---------|---------|---------|
|                         | NICS(0) | NICS(1) | NICS(0) | NICS(1) | NICS(0) | NICS(1) | NICS(0) | NICS(1) |
| I_bipy_NC <sub>py</sub> | -6.8    | -9.4    | -1.1    | -3.3    | -11.4   | -9.1    |         |         |
| I_bipy_NC <sub>im</sub> | -6.0    | -8.7    | -0.8    | -3.7    | -11.8   | -9.2    |         |         |
| I_phen_NC <sub>py</sub> | -5.6    | -9.1    | 1.0     | -2.0    | -11.1   | -8.7    | 2.7     | -0.2    |

|                         |      |      |     |      |       |      |      |       |
|-------------------------|------|------|-----|------|-------|------|------|-------|
| I_phen_NC <sub>im</sub> | -7.0 | -9.8 | 0.8 | -2.1 | -11.6 | -9.1 | -8.6 | -10.4 |
|-------------------------|------|------|-----|------|-------|------|------|-------|

**Table S5.** CPCM-B3LYP/6-31+G(d)-LANL2DZ cartesian coordinates, in Å, of the optimized structures of the two possible ring-opening products for bipy and phen in CH<sub>2</sub>Cl<sub>2</sub> solution.

|                               |           |           |                               |           |           |           |
|-------------------------------|-----------|-----------|-------------------------------|-----------|-----------|-----------|
| <b>I_bipy_NC<sub>py</sub></b> |           |           | N                             | 3.283474  | -1.318808 | -1.094419 |
| N                             | -3.354720 | -1.914551 | C                             | 1.485077  | -1.619197 | -2.346320 |
| C                             | -2.434383 | -1.012252 | H                             | 0.774503  | -1.859660 | -3.120942 |
| N                             | -1.190933 | -1.482762 | O                             | -1.829704 | -3.364201 | -0.018178 |
| C                             | -1.333447 | -2.709353 | C                             | -1.737424 | -0.409468 | -1.925350 |
| C                             | -2.664957 | -2.982937 | C                             | 1.265892  | 2.117205  | -0.084326 |
| C                             | -2.719264 | 0.215453  | C                             | 4.690959  | -1.281589 | -0.689495 |
| C                             | -1.617882 | 1.265845  | H                             | 4.861281  | -1.937347 | 0.165125  |
| C                             | -2.384572 | 2.307866  | H                             | 4.982254  | -0.263217 | -0.432862 |
| C                             | -3.673394 | 1.940558  | H                             | 5.286215  | -1.626833 | -1.533685 |
| C                             | -3.886942 | 0.660405  | C                             | 2.185360  | -0.902745 | -0.408221 |
| C                             | -1.115855 | 1.829856  | C                             | 2.151593  | 1.294195  | 0.744973  |
| N                             | -0.093360 | 1.165584  | C                             | 0.360635  | 0.214806  | 2.679758  |
| C                             | 0.341520  | 1.576496  | H                             | 0.165962  | 1.235827  | 2.358005  |
| C                             | -0.216811 | 2.654746  | H                             | 1.170545  | 0.208404  | 3.417599  |
| C                             | -1.269035 | 3.344521  | H                             | -0.536955 | -0.195182 | 3.141449  |
| C                             | -1.720923 | 2.925398  | C                             | 2.844830  | -1.775797 | -2.322481 |
| Re                            | 0.773462  | -0.557032 | H                             | 3.534748  | -2.170240 | -3.051315 |
| C                             | 1.513892  | -1.469800 | C                             | -1.434010 | -2.261275 | -0.123207 |
| O                             | 1.935929  | -2.037419 | C                             | -0.387745 | 3.785120  | -1.552524 |
| N                             | -0.437997 | 0.664693  | H                             | -1.077639 | 4.391609  | -2.126648 |
| C                             | -0.901944 | -0.215375 | C                             | 2.063073  | -0.234220 | 0.943224  |
| C                             | -4.810597 | -1.804216 | C                             | 1.682586  | 3.422410  | -0.419727 |
| P                             | 2.948037  | 0.531611  | C                             | 0.756554  | -2.055019 | 1.990120  |
| C                             | 3.105357  | 2.343545  | H                             | 1.102116  | -2.706353 | 1.187315  |
| C                             | 1.361497  | -1.952976 | H                             | -0.248712 | -2.355716 | 2.282139  |
| O                             | 1.711871  | -2.806323 | H                             | 1.418396  | -2.149492 | 2.856059  |
| C                             | 0.358135  | 1.764583  | C                             | -4.285579 | 0.444073  | -0.160328 |
| C                             | 3.798375  | 0.361232  | H                             | -4.110398 | 1.164260  | -0.964878 |
| C                             | 4.256250  | -0.131914 | H                             | -5.140866 | 0.772469  | 0.438050  |
| H                             | 1.157371  | 1.007157  | H                             | -4.510509 | -0.525155 | -0.613028 |
| H                             | 0.170625  | 2.939598  | C                             | 3.867541  | 0.637309  | 2.160071  |
| H                             | -1.729531 | 4.194049  | H                             | 4.737913  | 0.749837  | 2.794008  |
| H                             | -2.536131 | 3.439019  | C                             | 3.225290  | -0.512519 | 1.885503  |
| H                             | -1.938577 | 3.223873  | H                             | 3.481105  | -1.499928 | 2.243603  |
| H                             | -4.455273 | 2.497394  | C                             | -3.402321 | -0.780910 | 2.254472  |
| H                             | -4.842997 | 0.158285  | H                             | -2.682454 | -0.822899 | 3.075834  |
| H                             | 0.601129  | 2.514552  | H                             | -3.550768 | -1.794462 | 1.872753  |
| H                             | -0.196718 | 2.237656  | H                             | -4.352184 | -0.396246 | 2.638837  |
| H                             | 1.273947  | 1.340325  | C                             | 3.223339  | 1.740795  | 1.452031  |
| H                             | -1.610914 | 0.317347  | C                             | -0.735066 | 2.488033  | -1.213227 |
| H                             | -1.363606 | -1.115458 | H                             | -1.689598 | 2.086592  | -1.525871 |
| H                             | -0.028296 | -0.500436 | C                             | 0.861176  | 4.263827  | -1.150677 |
| H                             | -0.481032 | -3.303498 | H                             | 1.188410  | 5.265239  | -1.407296 |
| H                             | -3.177790 | -3.826145 | C                             | -2.742882 | 1.955657  | 1.708603  |
| H                             | -5.214366 | -1.945633 | H                             | -1.998935 | 1.975979  | 2.508644  |
| H                             | -5.112242 | -0.829442 | H                             | -3.725367 | 2.175952  | 2.137493  |
| H                             | -5.202858 | -2.582675 | H                             | -2.490548 | 2.731884  | 0.981954  |
| H                             | 3.255356  | 0.880566  | O                             | -2.289630 | -0.377412 | -2.964037 |
| H                             | 3.857560  | -0.699018 | H                             | 2.662386  | 3.762343  | -0.110554 |
| H                             | 4.809926  | 0.774858  | H                             | 3.562953  | 2.766035  | 1.517419  |
| H                             | 3.976326  | 0.037656  | <b>I_phen_NC<sub>py</sub></b> |           |           |           |
| H                             | 5.211463  | 0.362967  | Re                            | 0.870154  | -0.661522 | -0.034305 |
| H                             | 4.368838  | -1.208164 | P                             | 2.862112  | 0.736388  | -0.379870 |
| H                             | 2.687874  | 2.577107  | N                             | -0.881632 | -1.873108 | 0.388076  |
| H                             | 2.574577  | 2.932117  | N                             | -0.622840 | 0.566649  | -1.436410 |
| H                             | 4.161663  | 2.628265  | N                             | -0.098467 | 0.836664  | 1.320290  |
| <b>I_bipy_NC<sub>im</sub></b> |           |           | N                             | -2.959207 | -2.583252 | 0.703027  |
| Re                            | -0.796843 | -0.493802 | C                             | -0.839695 | -3.161496 | 0.868296  |
| P                             | -2.777444 | 0.297121  | H                             | 0.093746  | -3.671510 | 1.040561  |
| N                             | 1.091521  | -1.066304 | O                             | 1.904626  | -2.559119 | -2.213641 |
| N                             | 0.704463  | -0.640291 | C                             | 1.856796  | -1.606954 | 1.260438  |
| N                             | 0.053743  | 1.645885  | C                             | -1.056098 | 1.584309  | 0.734170  |
|                               |           |           | C                             | -4.414201 | -2.640942 | 0.820632  |

|   |           |           |           |   |           |           |           |
|---|-----------|-----------|-----------|---|-----------|-----------|-----------|
| H | -4.875094 | -2.867860 | -0.143935 | H | 1.180797  | 0.127955  | 3.351430  |
| H | -4.792574 | -1.688855 | 1.194395  | H | -0.583082 | 0.113395  | 3.141285  |
| H | -4.666737 | -3.428759 | 1.529735  | H | 2.608608  | -3.422016 | -2.856467 |
| C | -2.179403 | -1.535115 | 0.280427  | H | -0.271847 | 4.193918  | -2.570896 |
| C | -1.762334 | 0.967418  | -0.470107 | H | 0.359033  | -2.891158 | 1.422496  |
| C | -0.025661 | 1.795695  | -2.030440 | H | -0.788606 | -2.143141 | 2.549528  |
| H | 0.252461  | 2.503679  | -1.251897 | H | 0.923564  | -2.275389 | 3.001646  |
| H | -0.735279 | 2.275860  | -2.712062 | H | -3.909051 | 1.894463  | -1.037124 |
| H | 0.859879  | 1.504402  | -2.590206 | H | -4.916642 | 1.953048  | 0.432259  |
| C | -2.117548 | -3.606053 | 1.071606  | H | -4.703003 | 0.420006  | -0.458201 |
| H | -2.498134 | -4.539421 | 1.455268  | H | 4.839985  | -0.139808 | 2.392939  |
| C | 1.526768  | -1.829303 | -1.374035 | H | 3.062755  | -2.066700 | 2.303493  |
| C | 0.190750  | 2.526896  | 2.995022  | H | -2.801217 | 0.129590  | 3.200314  |
| H | 0.667317  | 2.841885  | 3.915432  | H | -3.943127 | -0.741879 | 2.161976  |
| C | -2.654355 | -0.290532 | -0.260221 | H | -4.329515 | 0.904868  | 2.733414  |
| C | -1.273767 | 2.926629  | 1.110780  | H | -1.346762 | 2.085181  | -1.885432 |
| C | -1.084253 | -0.267342 | -2.584550 | H | 2.024604  | 4.729716  | -1.703368 |
| H | -1.383911 | -1.257288 | -2.249103 | H | -1.488483 | 2.540594  | 2.267726  |
| H | -0.241133 | -0.370875 | -3.268828 | H | -3.106622 | 3.148555  | 1.849271  |
| H | -1.914689 | 0.217293  | -3.110225 | H | -1.793164 | 3.196029  | 0.648076  |
| C | 4.346603  | 0.129590  | 0.535101  | C | 4.111552  | 2.223344  | 0.732725  |
| H | 4.160213  | 0.142210  | 1.612100  | C | 3.475564  | 3.128808  | -0.087163 |
| H | 5.209269  | 0.764671  | 0.311171  | H | 5.090757  | 2.435656  | 1.147008  |
| H | 4.569075  | -0.898670 | 0.238147  | H | 3.947396  | 4.072708  | -0.341376 |
| C | -3.937271 | 1.301892  | -1.341241 |   |           |           |           |
| H | -4.837457 | 1.758057  | -1.735716 |   |           |           |           |
| C | -3.858764 | -0.059961 | -0.854783 |   |           |           |           |
| H | -4.660169 | -0.775975 | -0.967154 |   |           |           |           |
| C | 3.556045  | 0.820782  | -2.092673 |   |           |           |           |
| H | 2.885084  | 1.347477  | -2.774337 |   |           |           |           |
| H | 3.705009  | -0.193944 | -2.471616 |   |           |           |           |
| H | 4.517682  | 1.343711  | -2.075795 |   |           |           |           |
| C | -2.677525 | 3.385842  | -0.848249 |   |           |           |           |
| H | -3.260348 | 4.058362  | -1.470405 |   |           |           |           |
| C | -2.784021 | 1.959210  | -1.052144 |   |           |           |           |
| C | -2.019984 | 3.835952  | 0.245575  |   |           |           |           |
| H | -2.026394 | 4.887184  | 0.514002  |   |           |           |           |
| C | 0.480411  | 1.276681  | 2.456848  |   |           |           |           |
| H | 1.216046  | 0.619288  | 2.903556  |   |           |           |           |
| C | -0.643170 | 3.380548  | 2.281378  |   |           |           |           |
| H | -0.800935 | 4.403804  | 2.606530  |   |           |           |           |
| C | 2.864129  | 2.516535  | 0.124286  |   |           |           |           |
| H | 2.132175  | 3.089917  | -0.448016 |   |           |           |           |
| H | 3.857526  | 2.941955  | -0.049761 |   |           |           |           |
| H | 2.621316  | 2.607804  | 1.186305  |   |           |           |           |
| O | 2.436266  | -2.207935 | 2.088789  |   |           |           |           |

### I\_phen\_NC<sub>im</sub>

|    |           |           |           |
|----|-----------|-----------|-----------|
| C  | 1.526927  | 3.798589  | -1.451214 |
| C  | 0.267676  | 3.510878  | -1.926349 |
| C  | -0.342888 | 2.303830  | -1.543773 |
| N  | 0.223296  | 1.381985  | -0.761454 |
| C  | 1.508435  | 1.627275  | -0.313845 |
| C  | 2.182432  | 2.863354  | -0.618210 |
| Re | -1.073621 | -0.463048 | -0.237376 |
| C  | -2.113194 | -1.981563 | 0.183403  |
| O  | -2.768910 | -2.926790 | 0.430076  |
| C  | 2.208433  | 0.700582  | 0.485577  |
| C  | 1.830328  | -0.726388 | 0.892444  |
| C  | 2.992854  | -1.109046 | 1.804994  |
| C  | 3.905110  | -0.123013 | 1.845511  |
| C  | 3.460910  | 1.002516  | 1.014376  |
| N  | 0.456710  | -0.769969 | 1.548270  |
| C  | 0.231599  | -2.108385 | 2.170051  |
| C  | 1.727790  | -1.572831 | -0.362466 |
| N  | 0.581620  | -1.578728 | -1.041945 |
| C  | 0.773127  | -2.346315 | -2.166408 |
| C  | 2.065409  | -2.797322 | -2.165645 |
| N  | 2.666593  | -2.302858 | -1.023708 |
| C  | 4.077000  | -2.523404 | -0.690579 |
| P  | -2.730571 | 0.940022  | 0.878923  |
| C  | -2.228676 | 2.618472  | 1.467254  |
| C  | -2.048766 | -0.336785 | -1.842062 |
| O  | -2.628717 | -0.282070 | -2.864823 |
| C  | -4.211975 | 1.344228  | -0.142289 |
| C  | -3.527709 | 0.242797  | 2.391825  |
| C  | 0.367399  | 0.250525  | 2.627084  |
| H  | -0.018883 | -2.518633 | -2.877420 |
| H  | 4.168893  | -3.042641 | 0.263579  |
| H  | 4.608932  | -1.572684 | -0.642120 |
| H  | 4.508268  | -3.138642 | -1.479010 |
| H  | 0.404035  | 1.252293  | 2.202728  |

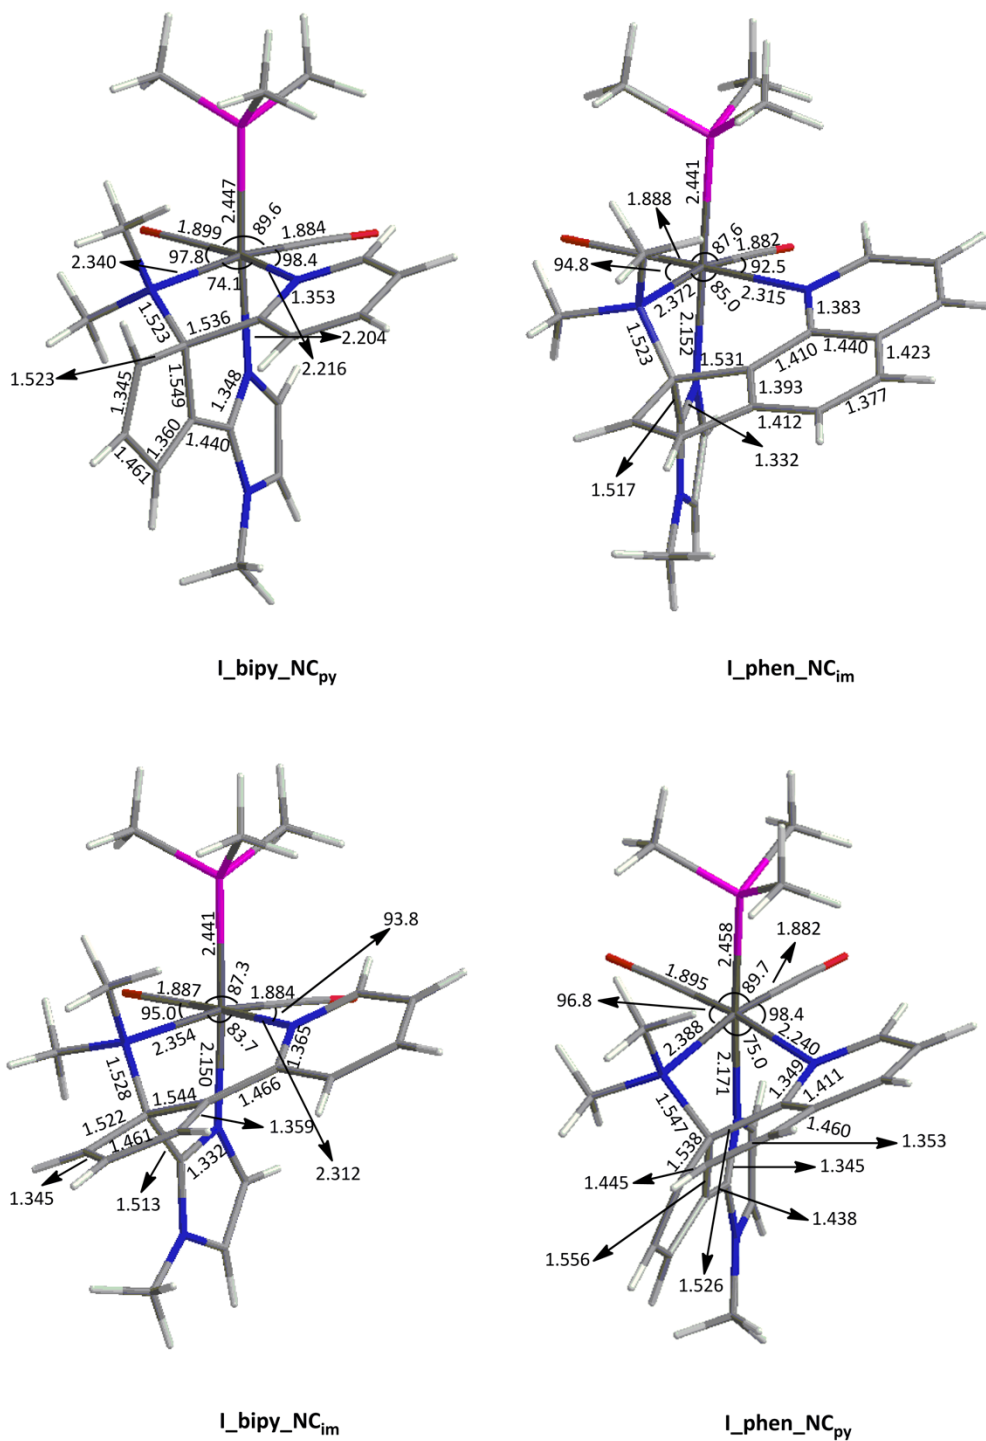

**Figure S1.** CPCM-B3LYP/6-31+G(d)-LANL2DZ optimized geometry of the two possible ring-opening products for bipy and phen. Some relevant distances and bond angles are given in Å and degrees, respectively.

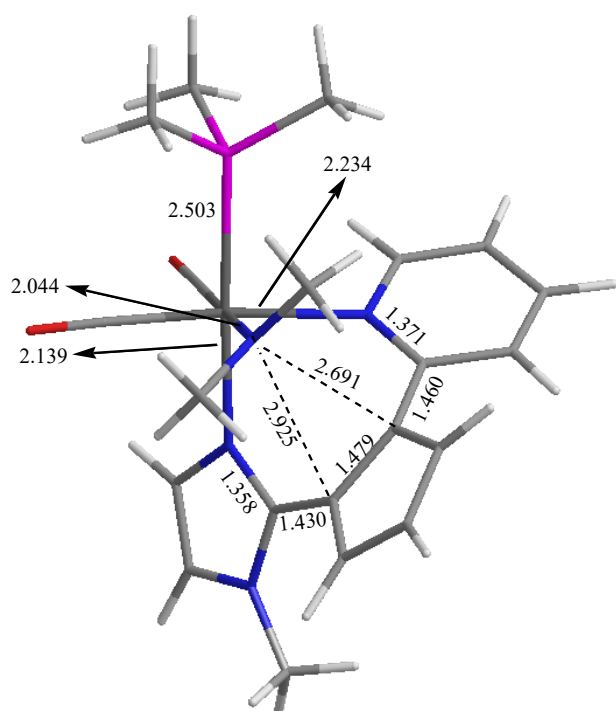

E = -1606.324311 hartree

$\Delta E = 25.5$  kcal/mol

G = -1605.929130 hartree

$\Delta G = 23.7$  kcal/mol

#### TS\_IIIa'\_IIIa

|    |           |           |           |   |           |           |           |
|----|-----------|-----------|-----------|---|-----------|-----------|-----------|
| Re | -0.636643 | -0.589068 | -0.033940 | C | 1.501874  | -2.423915 | -1.435010 |
| C  | -1.472427 | -1.320314 | -1.656590 | C | 2.845807  | -2.624578 | -1.549686 |
| O  | -1.971791 | -1.781012 | -2.597559 | N | 3.463729  | -1.587716 | -0.884511 |
| C  | -0.969264 | -2.310114 | 0.747167  | C | 4.910797  | -1.397069 | -0.820835 |
| O  | -1.131599 | -3.369205 | 1.204809  | H | 5.317707  | -1.824847 | 0.098287  |
| P  | -2.925756 | 0.265762  | 0.510532  | H | 5.138987  | -0.331732 | -0.853162 |
| C  | -3.255633 | 2.080993  | 0.608943  | H | 5.359734  | -1.896356 | -1.679154 |
| C  | -3.611659 | -0.368417 | 2.099190  | H | 3.413049  | -3.393327 | -2.049953 |
| C  | -4.218105 | -0.267446 | -0.690702 | H | 0.692515  | -3.021596 | -1.821180 |
| H  | -2.791021 | 2.516006  | 1.494954  | C | 2.493985  | -0.765900 | -0.378604 |
| H  | -2.867371 | 2.588343  | -0.277735 | C | 2.726482  | 0.374126  | 0.453393  |
| H  | -4.336148 | 2.243994  | 0.667226  | C | 3.751411  | 0.508058  | 1.392426  |
| H  | -3.010736 | -0.031444 | 2.947035  | C | 3.622397  | 1.778873  | 2.007979  |
| H  | -4.637731 | -0.010402 | 2.226279  | C | 2.561706  | 2.475577  | 1.404656  |
| H  | -3.608568 | -1.460958 | 2.082572  | C | 1.951477  | 1.634196  | 0.456518  |
| H  | -5.193935 | 0.106102  | -0.367891 | C | 0.993451  | 2.115028  | -0.535130 |
| H  | -3.998315 | 0.125685  | -1.687022 | C | 1.167821  | 3.424724  | -1.037942 |
| H  | -4.251444 | -1.357862 | -0.746934 | N | -0.052209 | 1.348709  | -0.980535 |
| N  | 0.101958  | 0.146916  | 1.724389  | C | -0.845018 | 1.853271  | -1.960603 |
| C  | 0.816987  | -0.672974 | 2.697390  | C | -0.699869 | 3.118432  | -2.500434 |
| C  | -0.328569 | 1.387701  | 2.366111  | C | 0.324672  | 3.935060  | -2.010074 |
| H  | -1.144520 | 1.158230  | 3.065905  | H | -1.640076 | 1.204846  | -2.306614 |
| H  | -0.676152 | 2.108772  | 1.629499  | H | -1.377473 | 3.451552  | -3.277082 |
| H  | 0.490935  | 1.827726  | 2.942460  | H | 0.474644  | 4.936390  | -2.397949 |
| H  | 0.162571  | -0.893419 | 3.552241  | H | 4.476193  | -0.250043 | 1.655643  |
| H  | 1.161536  | -1.602507 | 2.246955  | H | 4.243331  | 2.150866  | 2.813902  |
| H  | 1.683796  | -0.112146 | 3.077153  | H | 2.239499  | 3.479448  | 1.647344  |
| N  | 1.276127  | -1.269986 | -0.706557 | H | 2.003503  | 4.006721  | -0.671756 |

**Figure S2.** CPCM-B3LYP/6-31+G(d)-LANL2DZ optimized structure including only some relevant bond distances (in Å), absolute and relative electronic energy (E and  $\Delta E$ , respectively), absolute and relative Gibbs free energy (G and  $\Delta G$ , respectively), and cartesian coordinates (in Å) of the transition state **TS\_IIIa'\_IIIa** connecting isomers **IIIa'** and **IIIa**. Relative electronic and Gibbs free energies refer to **IIIa'**.



## References

1. Hevia, E.; Pérez, J.; Riera, L.; Riera, V.; del Río, I.; García-Granda, S.; Miguel, D. *Chem. Eur. J.* **2002**, *8*, 4510.
2. The method used herein is a variation of the previously reported in: R. Arévalo, R. López, L. Falvello, L. Riera, J. Pérez, *Chem. Eur. J.* **2021**, *27*, 379;
3. The method used herein is a variation of the previously reported in: R. Arévalo, M. I. Menéndez, R. López, I. Merino, L. Riera, J. Pérez, *Chem. Eur. J.*, **2016**, *22*, 17972.
4. *APPEX II*; Bruker AXS Inc.; Madison, WI, USA, 2004.
5. G. M. Sheldrick. *SHELX-97 (SHELXS 97 and SHELXL 97), Programs for Crystal Structure Analyses*; University of Göttingen: Göttingen (Germany), 1996.
6. *CrysAlis<sup>Pro</sup> CCD, CrysAlis<sup>Pro</sup> RED*. Oxford Diffraction Ltd., Abingdon, Oxfordshire, UK.
7. Farrugia, L. J. *J. Appl. Crystallogr.* **1999**, *32*, 837.
8. a) Sheldrick, G. M. *Acta Cryst.* **2008**, *A64*, 112-122; b) Sheldrick, G. M. *Acta Crystallogr., Sect. C: Struct. Chem.* **2015**, *71*, 3.
9. L. J. Farrugia, *J. Appl. Cryst.* **1997**, *30*, 565.
10. a) Barone, V.; Cossi, J. *Phys. Chem. A* **1998**, *102*, 1995-2001; b) Cossi, M.; Rega, N.; Scalmani, G.; Barone, V. *J. Comp. Chem.*, **2003**, *24*, 669-681.
11. Rappé, A. K.; Casewit, C. J.; Colwell, K. S.; Goddard, W. A., III; Skiff, W. M. UFF, *J. Am. Chem. Soc.* **1992**, *114*, 10024-10039.
12. a) Becke, A. D. *Phys. Rev. A: At., Mol., Opt. Phys.* **1988**, *38*, 3098-3100; b) Lee, C.; Yang, W.; Parr, R. G. *Phys. Rev. B: Condens. Matter Mater. Phys.* **1988**, *37*, 785-789; c) Becke, A. D. *J. Chem. Phys.* **1993**, *98*, 5648-5652.
13. Hehre, W. J.; Radom, L.; Pople, J. A.; Schleyer, P. v. R. *Ab Initio Molecular Orbital Theory*; Wiley: New York, 1986.
14. Hay, P. J.; Wadt, W. R. *J. Chem. Phys.* **1985**, *82*, 270-283.
15. a) Schlegel, H. B. *J. Comput. Chem.* **1982**, *3*, 214-218; b) Schlegel, H. B. *Theor. Chem. Acc.* **1984**, *66*, 333-340; c) Li, X.; Frisch, M. J. *J. Chem. Theory Comput.* **2006**, *2*, 835-839.
16. Tomasi, J.; Persico, M. *Chem. Rev.* **1994**, *94*, 2027-2094.
17. McQuarrie, D. A. *Statistical Mechanics*; Harper and Row: New York, 1976.
18. Ribeiro, R. F.; Marenich, A. V.; Cramer, C. J.; Truhlar, D. G. *J. Phys. Chem. B* **2011**, *115*, 14556-14562.
19. a) Weinhold, F.; Landis, C. R. *Valency and Bonding: A Natural Bond Orbital Donor-Acceptor Perspective*; Cambridge University Press: Cambridge, England, **2005**; b) Glendening, E. D.; Reed, A. E.; Carpenter, J. E.; Weinhold, F. NBO, Version 3.1; University of Wisconsin: Madison, WI, 2012.
20. a) Bader, R. F. W. *Atoms in Molecules. A Quantum Theory*; University Press: Oxford, England, **1990**; b) Biegler-König, F. W.; Bader, R. F. W.; Tang, T.-H. *J. Comput. Chem.* **1982**, *3*, 317-328; c) Bader, R. F. W.; Popelier, P. L. A.; Keith, T. A. *Angew. Chem., Int. Ed. Engl.* **1994**, *33*, 620-631.
21. a) London, F. *J. Phys. Radium* **1937**, *8*, 397-409; b) McWeeny, *Phys. Rev.* **1962**, *126*, 1028; c) Ditchfield, R. *Mol. Phys.* **1974**, *27*, 789-807; d) Wolinski, K.; Hilton, J. F.; Pulay, P. *J. Am. Chem. Soc.* **1990**, *112*, 8251-8260; e) Cheeseman, J. R.; Trucks, G. W.; Keith, T. A.; Frisch, M. J. *J. Chem. Phys.* **1996**, *104*, 5497-509.

22. a) Schleyer, P. v. R.; Maerker, C.; Dransfeld, A.; Jiao, H. J.; Hommes, N. J. R. V. *J. Am. Chem. Soc.* **1996**, *118*, 6317-6318; b) Chen, Z.; Wannere, C. S.; Corminboeuf, C.; Puchta, R.; Schleyer, P. v. R. *Chem. Rev.* **2005**, *105*, 3842-3888.

23. a) Schleyer, P. v. R.; Jiao, H.; Hommes, N. J. R. v. E.; Malkin, V. G.; Malkina, O. *J. Am. Chem. Soc.* **1997**, *119*, 12669-12670; b) Schleyer, P. v. R.; Manoharan, M.; Wang, Z. X.; Kiran, B.; Jiao, H.; Puchta, R.; Hommes, N. J. R. v. E. *Org. Lett.* **2001**, *3*, 2465-2468.

24. a) Fombona, S.; Espinal-Viguri, M.; Huertos, M. A.; Díaz, J.; López, R.; Menéndez, M. I.; Pérez, J.; Riera, L. *Chem. Eur. J.* **2016**, *22*, 17160-17164; b) Arévalo, R.; Menéndez, M. I.; López, R.; Merino, I.; Riera, L.; Pérez, J. *Chem. Eur. J.* **2016**, *22*, 17972-17975; c) Álvarez, D.; Mera-Adasme, R.; Riera, L.; Cárdenas-Jirón, G. I.; Pérez, J.; Díaz, J.; Menéndez, M. I.; López, R. *Inorg. Chem.* **2017**, *56*, 6652-6661; d) Espinal-Viguri, M.; Fombona, S.; Álvarez, D.; Díaz, J.; Menéndez, M. I.; López, R.; Pérez, J.; Riera, L. *Chem. Eur. J.* **2019**, *25*, 9253-9265; e) Arévalo, R.; López, R.; Falvello, L. R.; Riera, L.; Pérez, L. *Chem. Eur. J.* **2021**, *27*, 379-389.

25 Frisch, M. J.; Trucks, G. W.; Schlegel, H. B.; Scuseria, G. E.; Robb, M. A.; Cheeseman, J. R.; Scalmani, G.; Barone, V.; Mennucci, B.; Petersson, G. A.; Nakatsuji, H.; Caricato, M.; Li, X.; Hratchian, H. P.; Izmaylov, A. F.; Bloino, J.; Zheng, G.; Sonnenberg, J. L.; Hada, M.; Ehara, M.; Toyota, K.; Fukuda, R.; Hasegawa, J.; Ishida, M.; Nakajima, T.; Honda, Y.; Kitao, O.; Nakai, H.; Vreven, T.; Montgomery, J. A.; Peralta, J. E.; Ogliaro, F.; Bearpark, M.; Heyd, J. J.; Brothers, E.; Kudin, K. N.; Staroverov, V. N.; Kobayashi, R.; Normand, J.; Raghavachari, K.; Rendell, A.; Burant, J. C.; Iyengar, S. S.; Tomasi, J.; Cossi, M.; Rega, N.; Millam, J. M.; Klene, M.; Knox, J. E.; Cross, J. B.; Bakken, V.; Adamo, C.; Jaramillo, J.; Gomperts, R.; Stratmann, R. E.; Yazyev, O.; Austin, A. J.; Cammi, R.; Pomelli, C.; Ochterski, J. W.; Martin, R. L.; Morokuma, K.; Zakrzewski, V. G.; Voth, G. A.; Salvador, P.; Dannenberg, J. J.; Dapprich, S.; Daniels, A. D.; Farkas; Foresman, J. B.; Ortiz, J. V.; Cioslowski, J.; Fox, D. J., Gaussian 09, Revision D.01. Wallingford CT, 2009.

$^1\text{H}$  NMR ( $\text{CD}_2\text{Cl}_2$ )  
(298K)

8.99  
8.98

8.64  
8.62

8.24

7.62

5.32  $\text{CD}_2\text{Cl}_2$

2.18  
2.18

1.16  
1.14

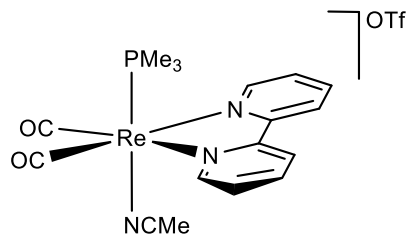

1

1.90H

2.00H

2.01H

2.01H

3.00H

9.19H

f1 (ppm)

$^{13}\text{C}$  NMR ( $\text{CD}_2\text{Cl}_2$ )  
(298K)

201.6  
201.5

156.2  
152.7

140.4

128.1  
125.1  
123.0  
122.9

123.0  
122.9

17.3  
16.9

4.2



1

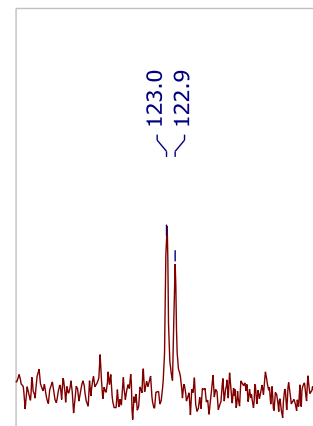

124  
123  
122  
f1 (ppm)

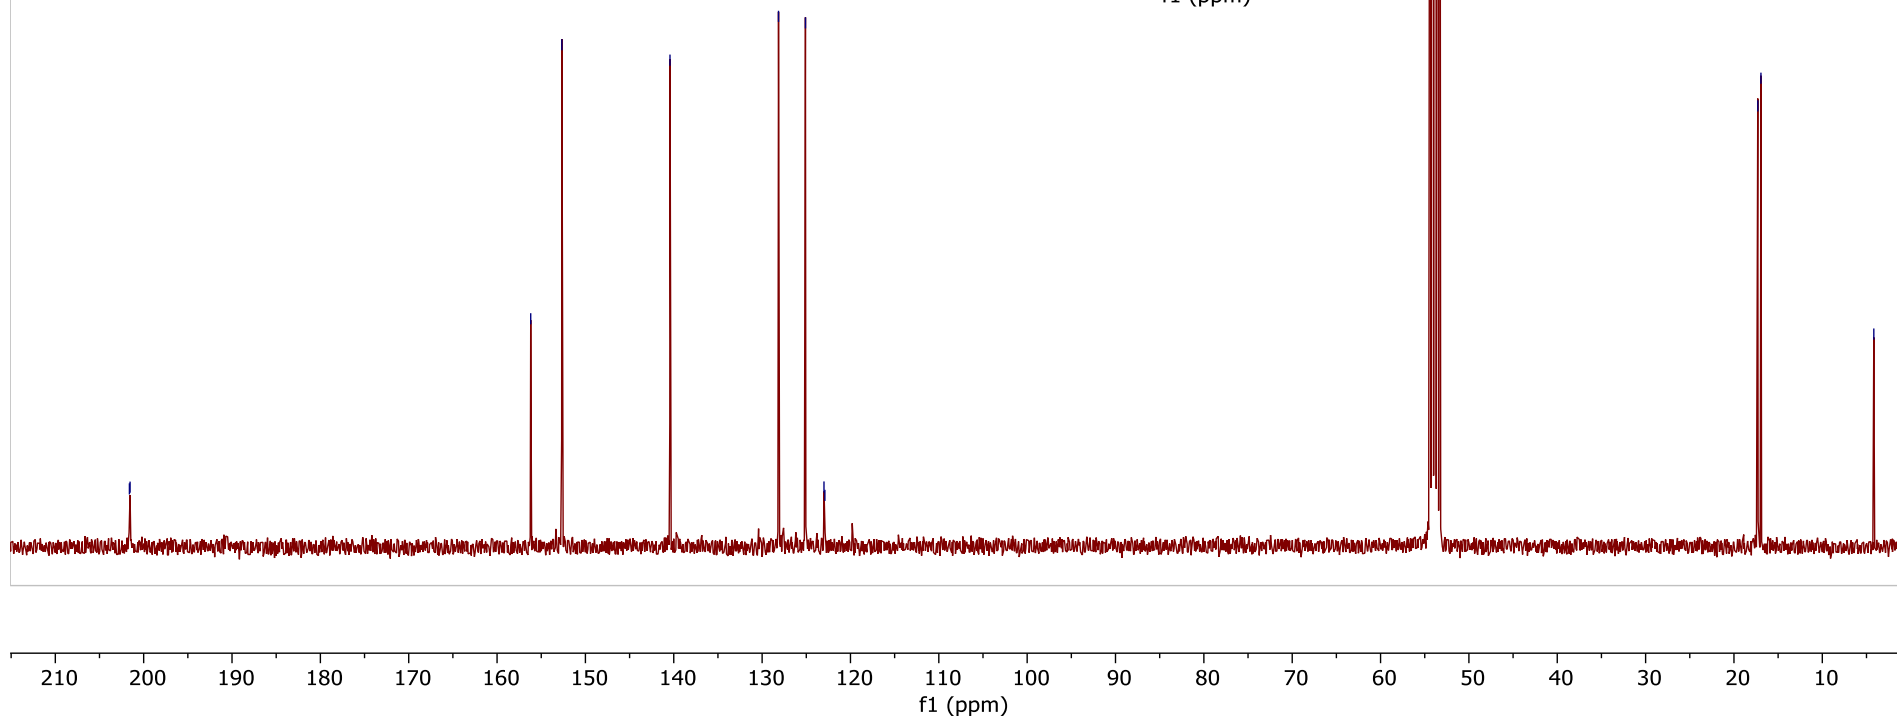

$^{31}\text{P}$  NMR ( $\text{CD}_2\text{Cl}_2$ )  
(298K)

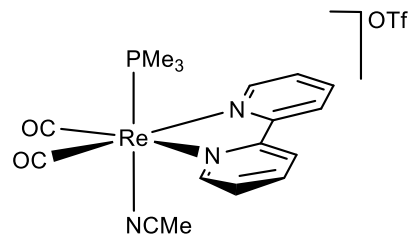

1

— -21.05

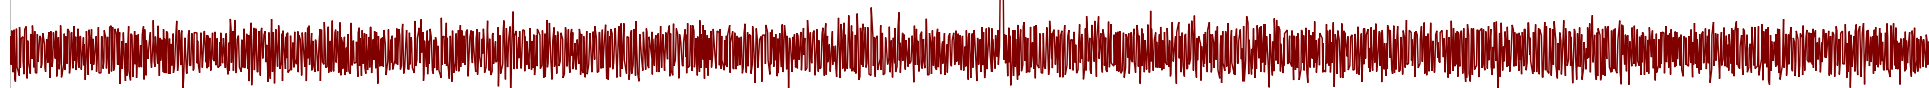

160 140 120 100 80 60 40 20 0 -20 -40 -60 -80 -100 -120 -140 -160 -180 -200  
f1 (ppm)

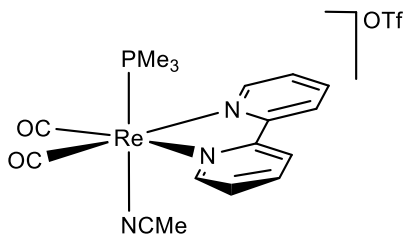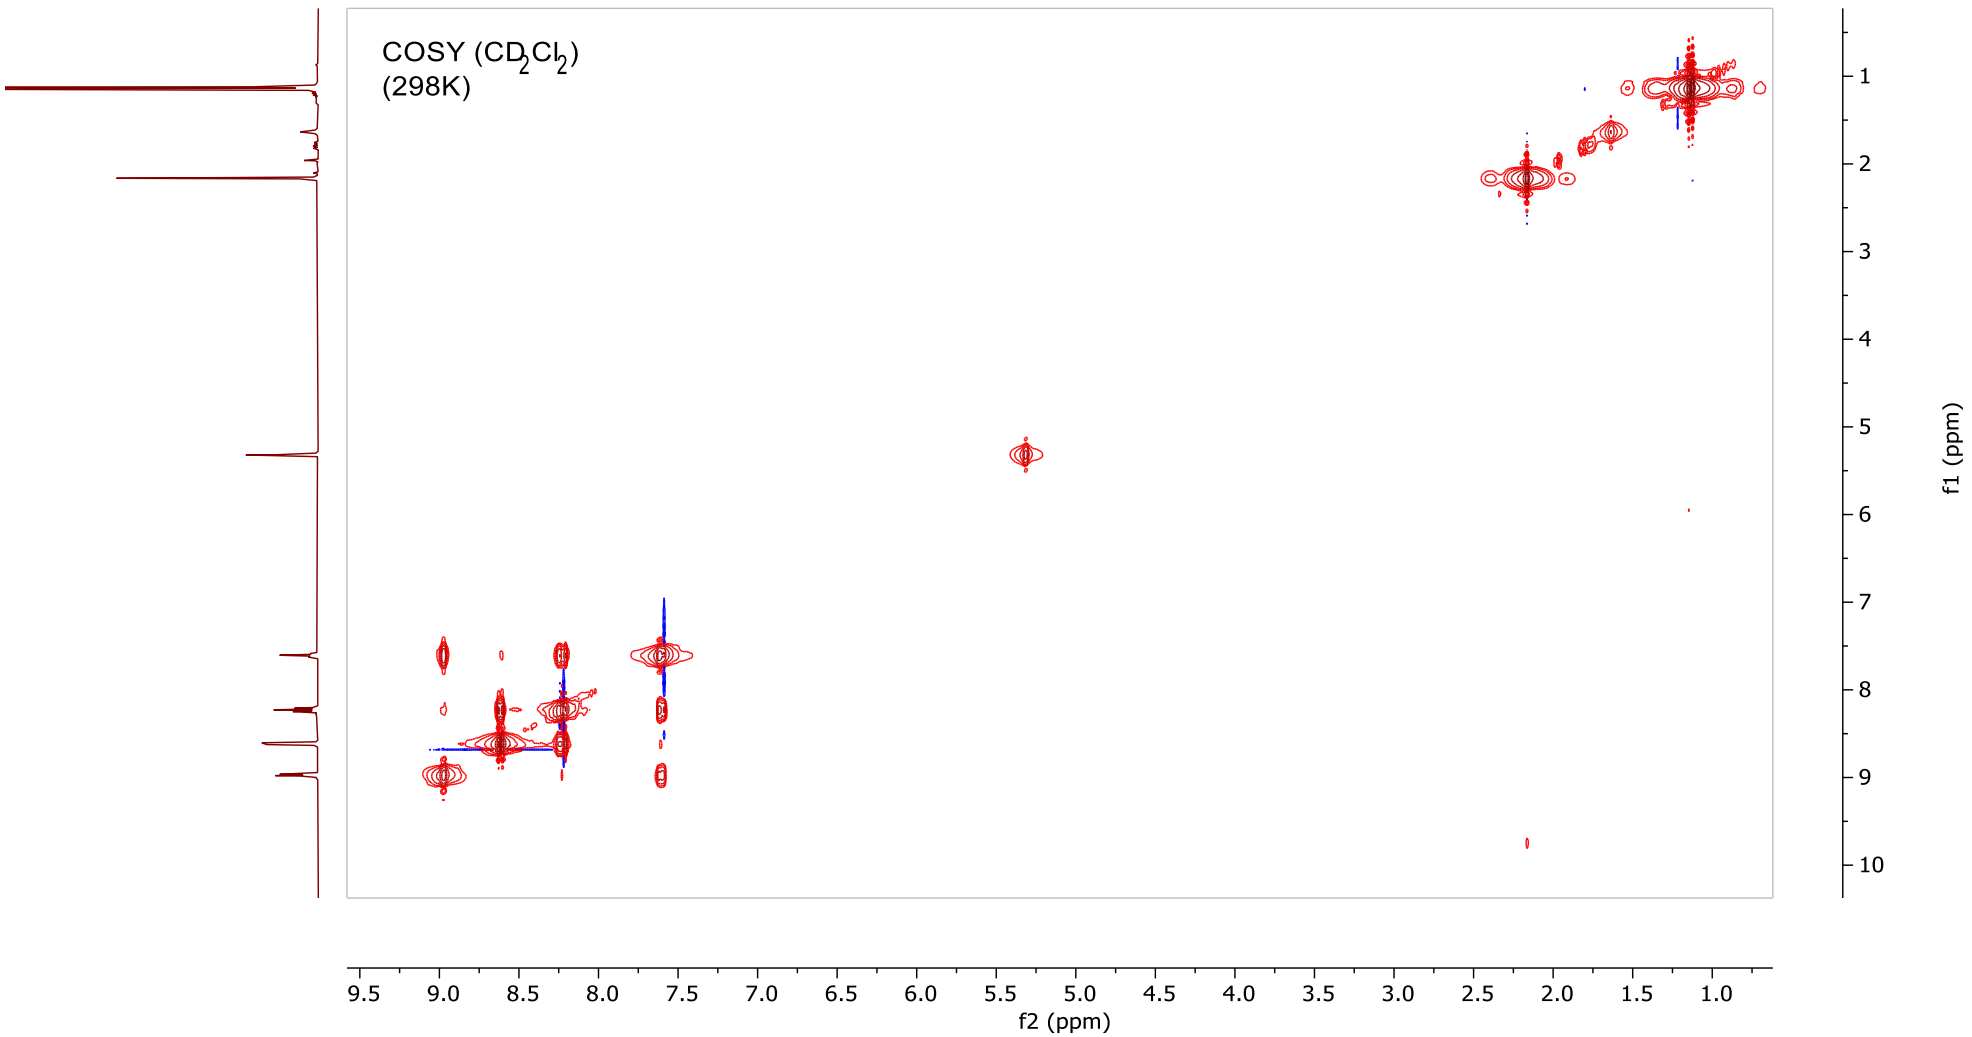



**1**

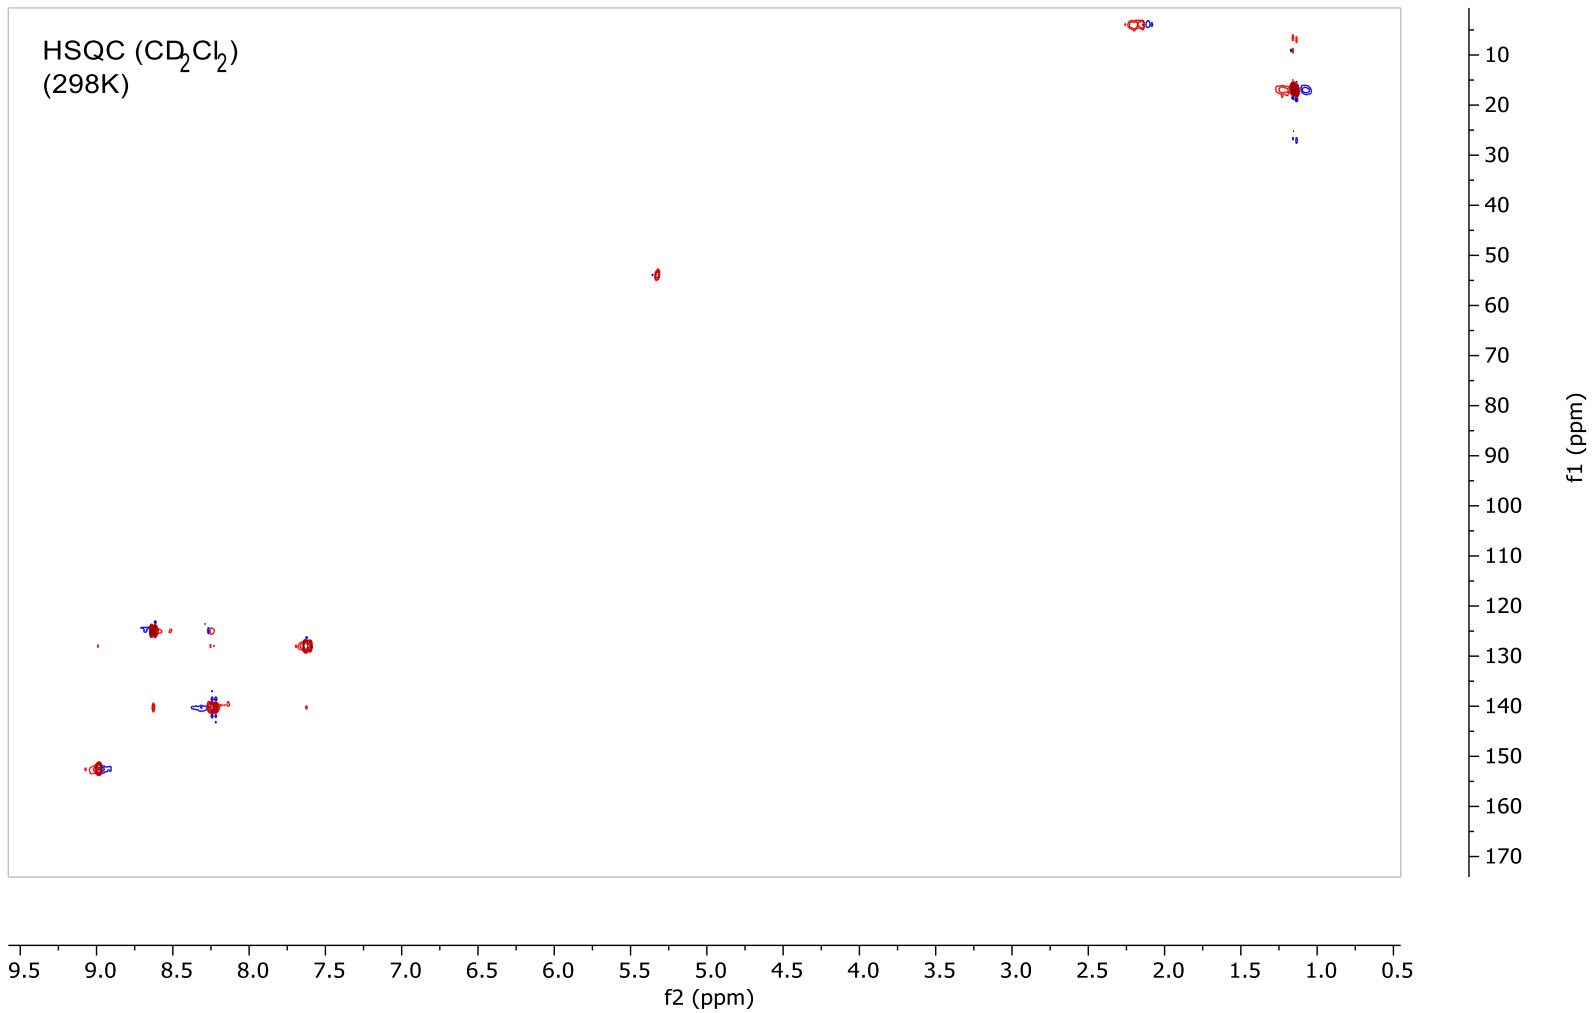

$^1\text{H}$  NMR ( $\text{CD}_2\text{Cl}_2$ )  
(298K)

— 5.32  $\text{CD}_2\text{Cl}_2$

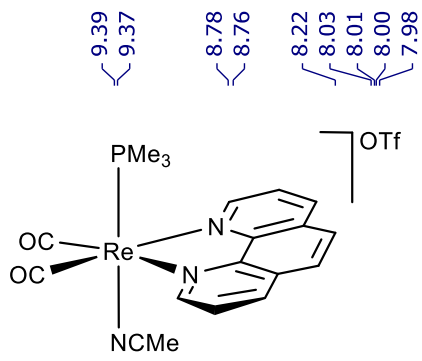

**2**

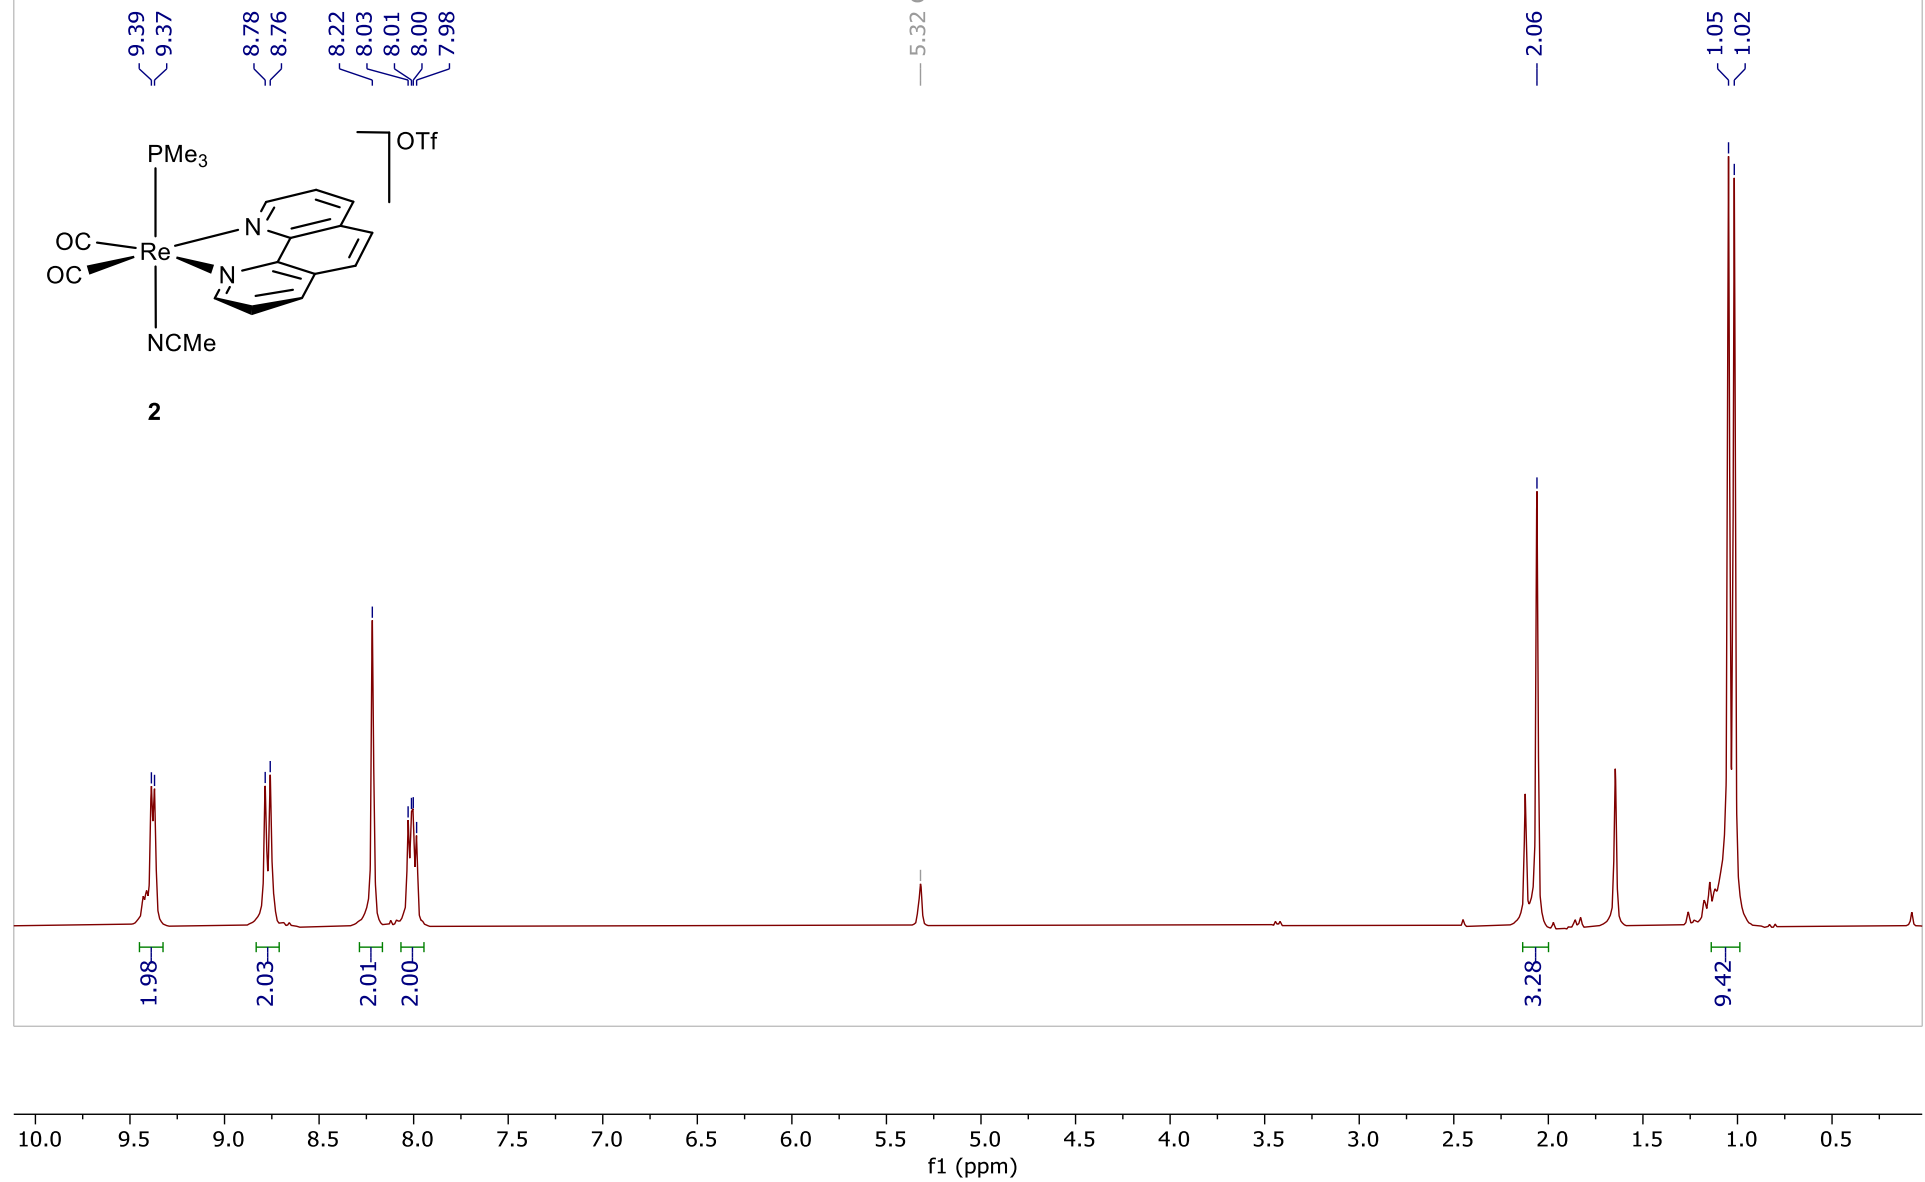



$^{13}\text{C}$  NMR ( $\text{CD}_2\text{Cl}_2$ )  
(298K)

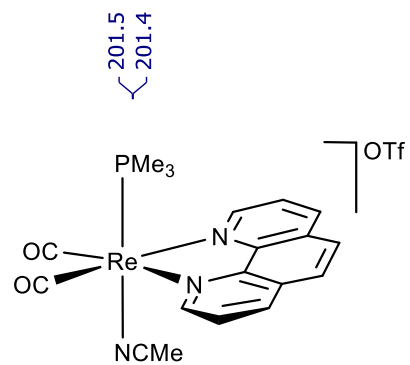

**2**

— 201.5  
— 201.4  
— 153.2  
— 147.0  
— 139.5  
— 131.4  
— 128.6  
— 126.8  
— 123.1  
— 123.0  
— 119.2

— 17.2  
— 16.8  
— 4.1

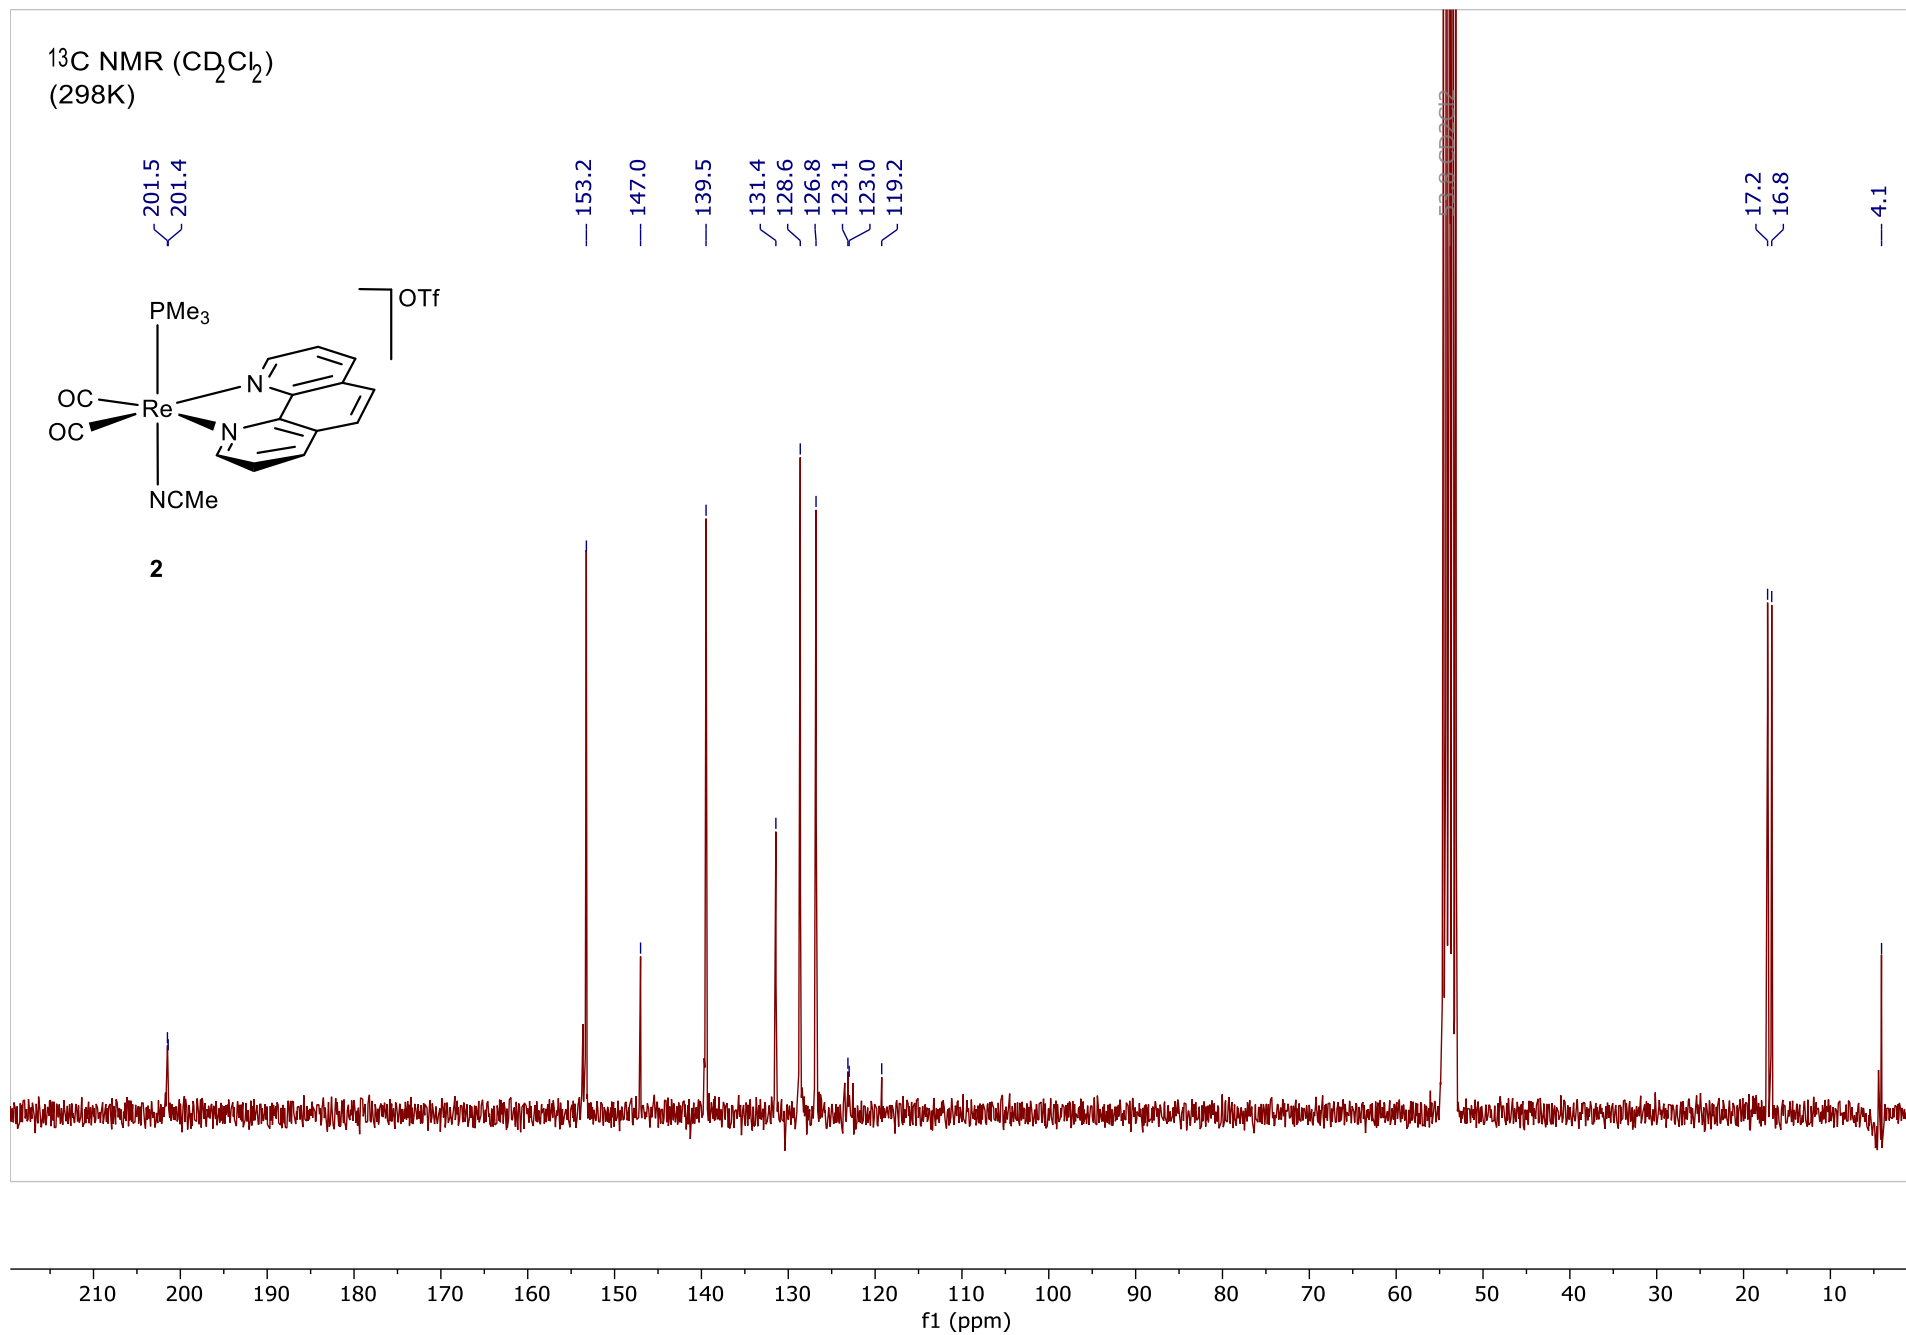

$^{31}\text{P}$  NMR ( $\text{CD}_2\text{Cl}_2$ )  
(298K)

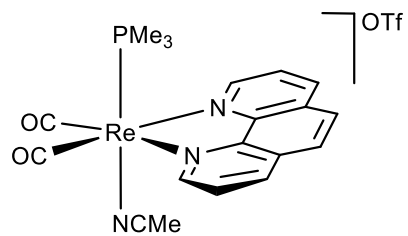

2

-21.5

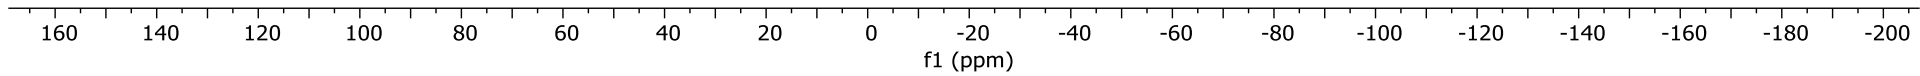

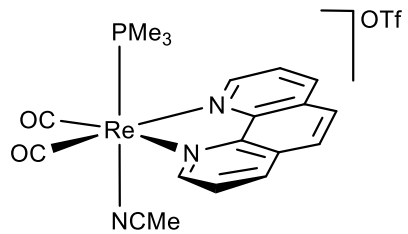

**2**

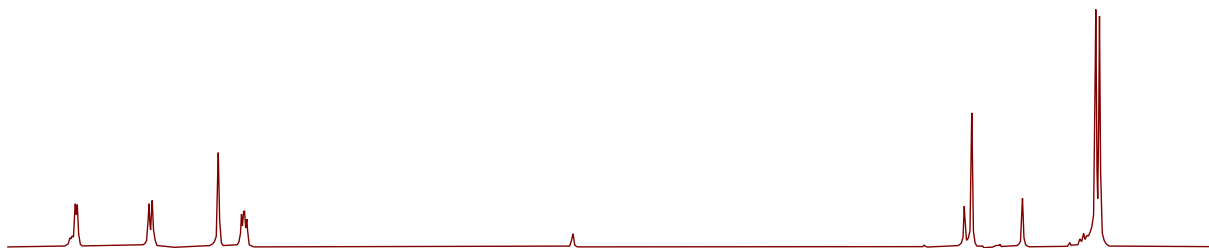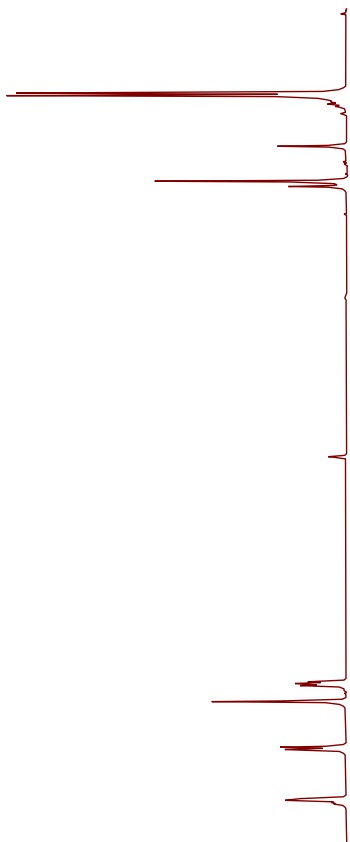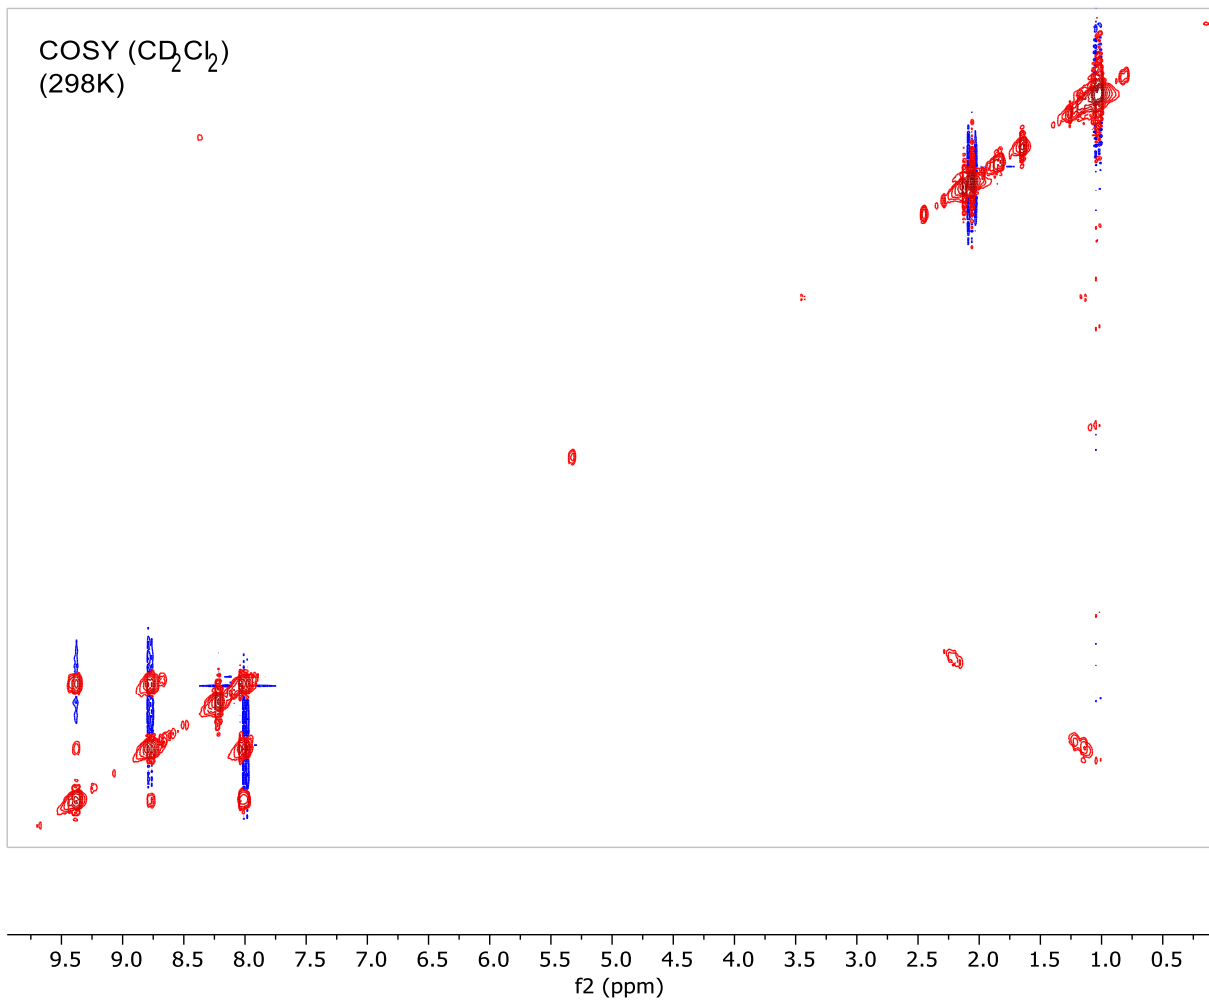

f<sub>1</sub> (ppm)

f<sub>2</sub> (ppm)

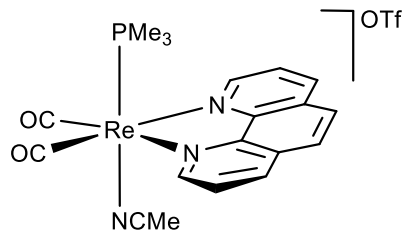

2

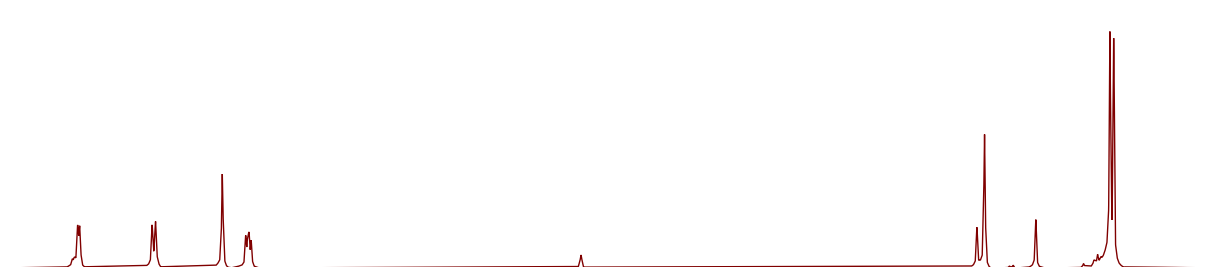

HSQC (CD<sub>2</sub>Cl<sub>2</sub>)  
(298K)

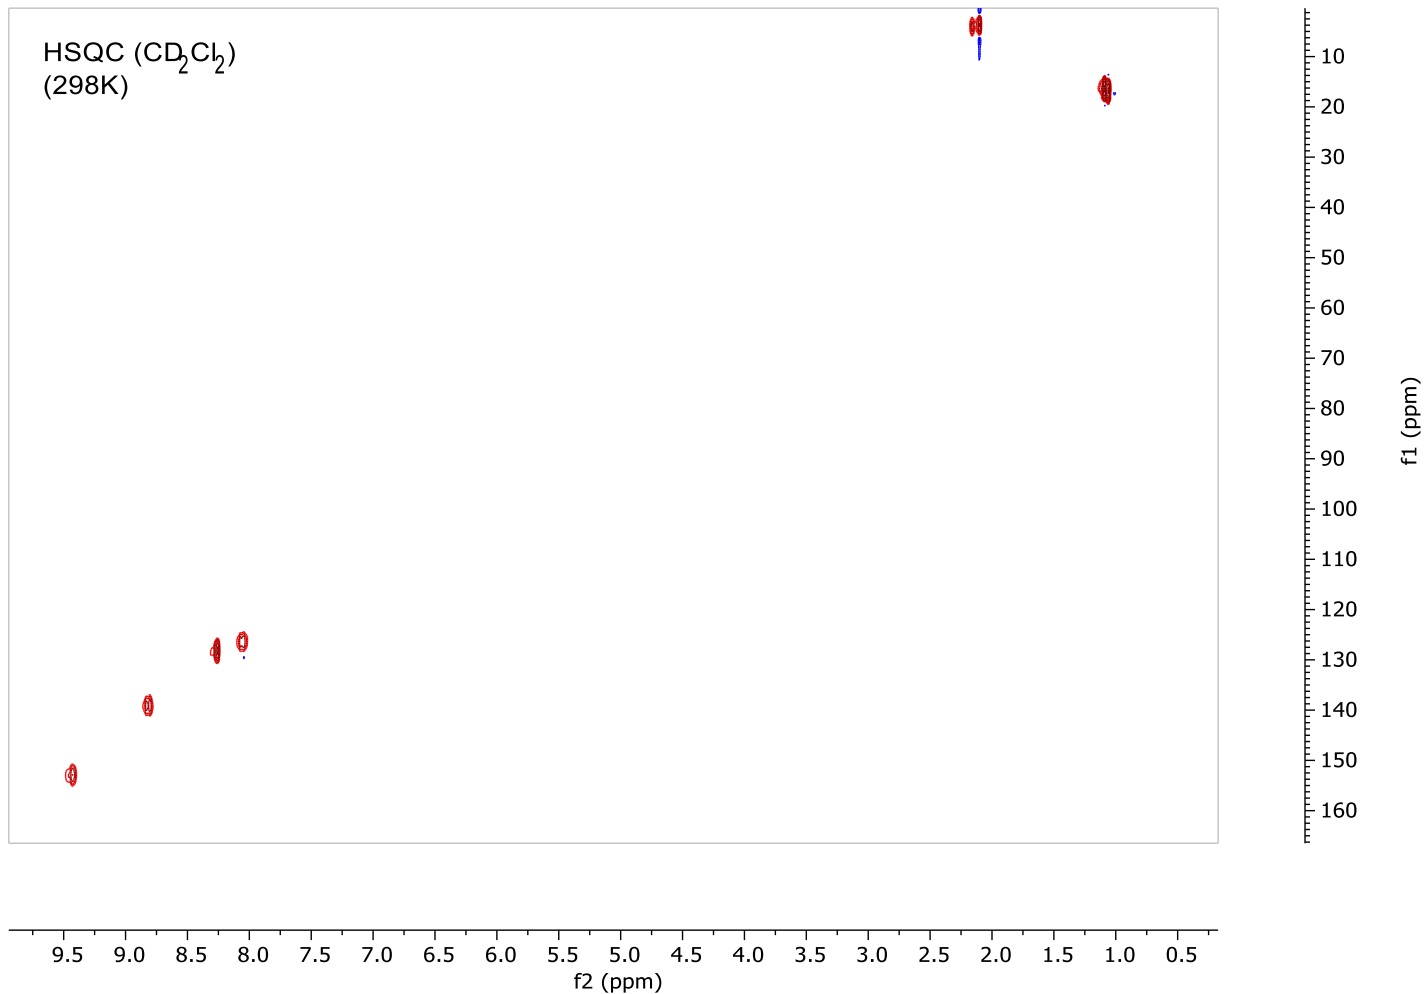

<sup>1</sup>H NMR (CD<sub>2</sub>Cl<sub>2</sub>)  
(298K)

9.06  
9.05

8.58  
8.55

8.20

7.60

7.22

6.72

6.45

5.32 CD<sub>2</sub>Cl<sub>2</sub>

3.55

1.21  
1.18

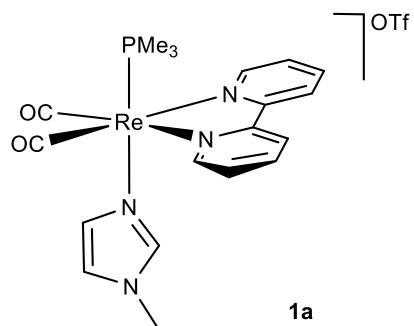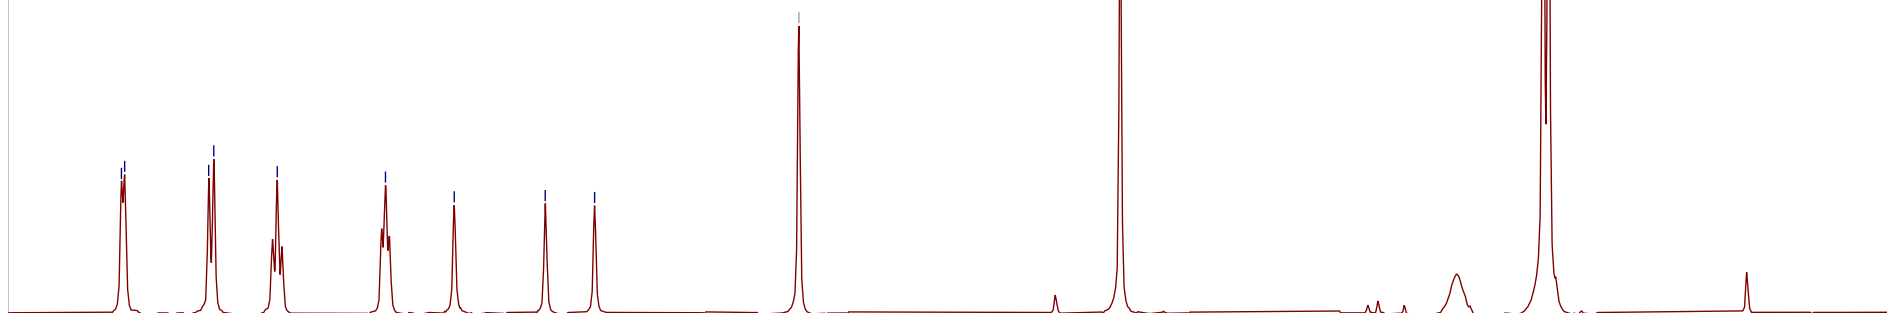

9.5 9.0 8.5 8.0 7.5 7.0 6.5 6.0 5.5 5.0 4.5 4.0 3.5 3.0 2.5 2.0 1.5 1.0 0.5 0.0 -0.5  
f1 (ppm)

$^{13}\text{C}$  NMR ( $\text{CD}_2\text{Cl}_2$ )  
(298K)

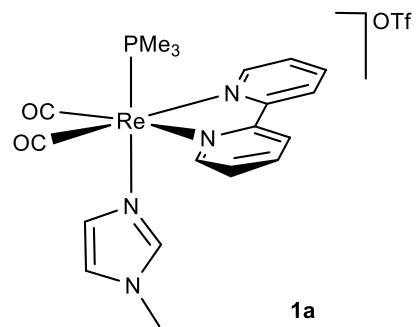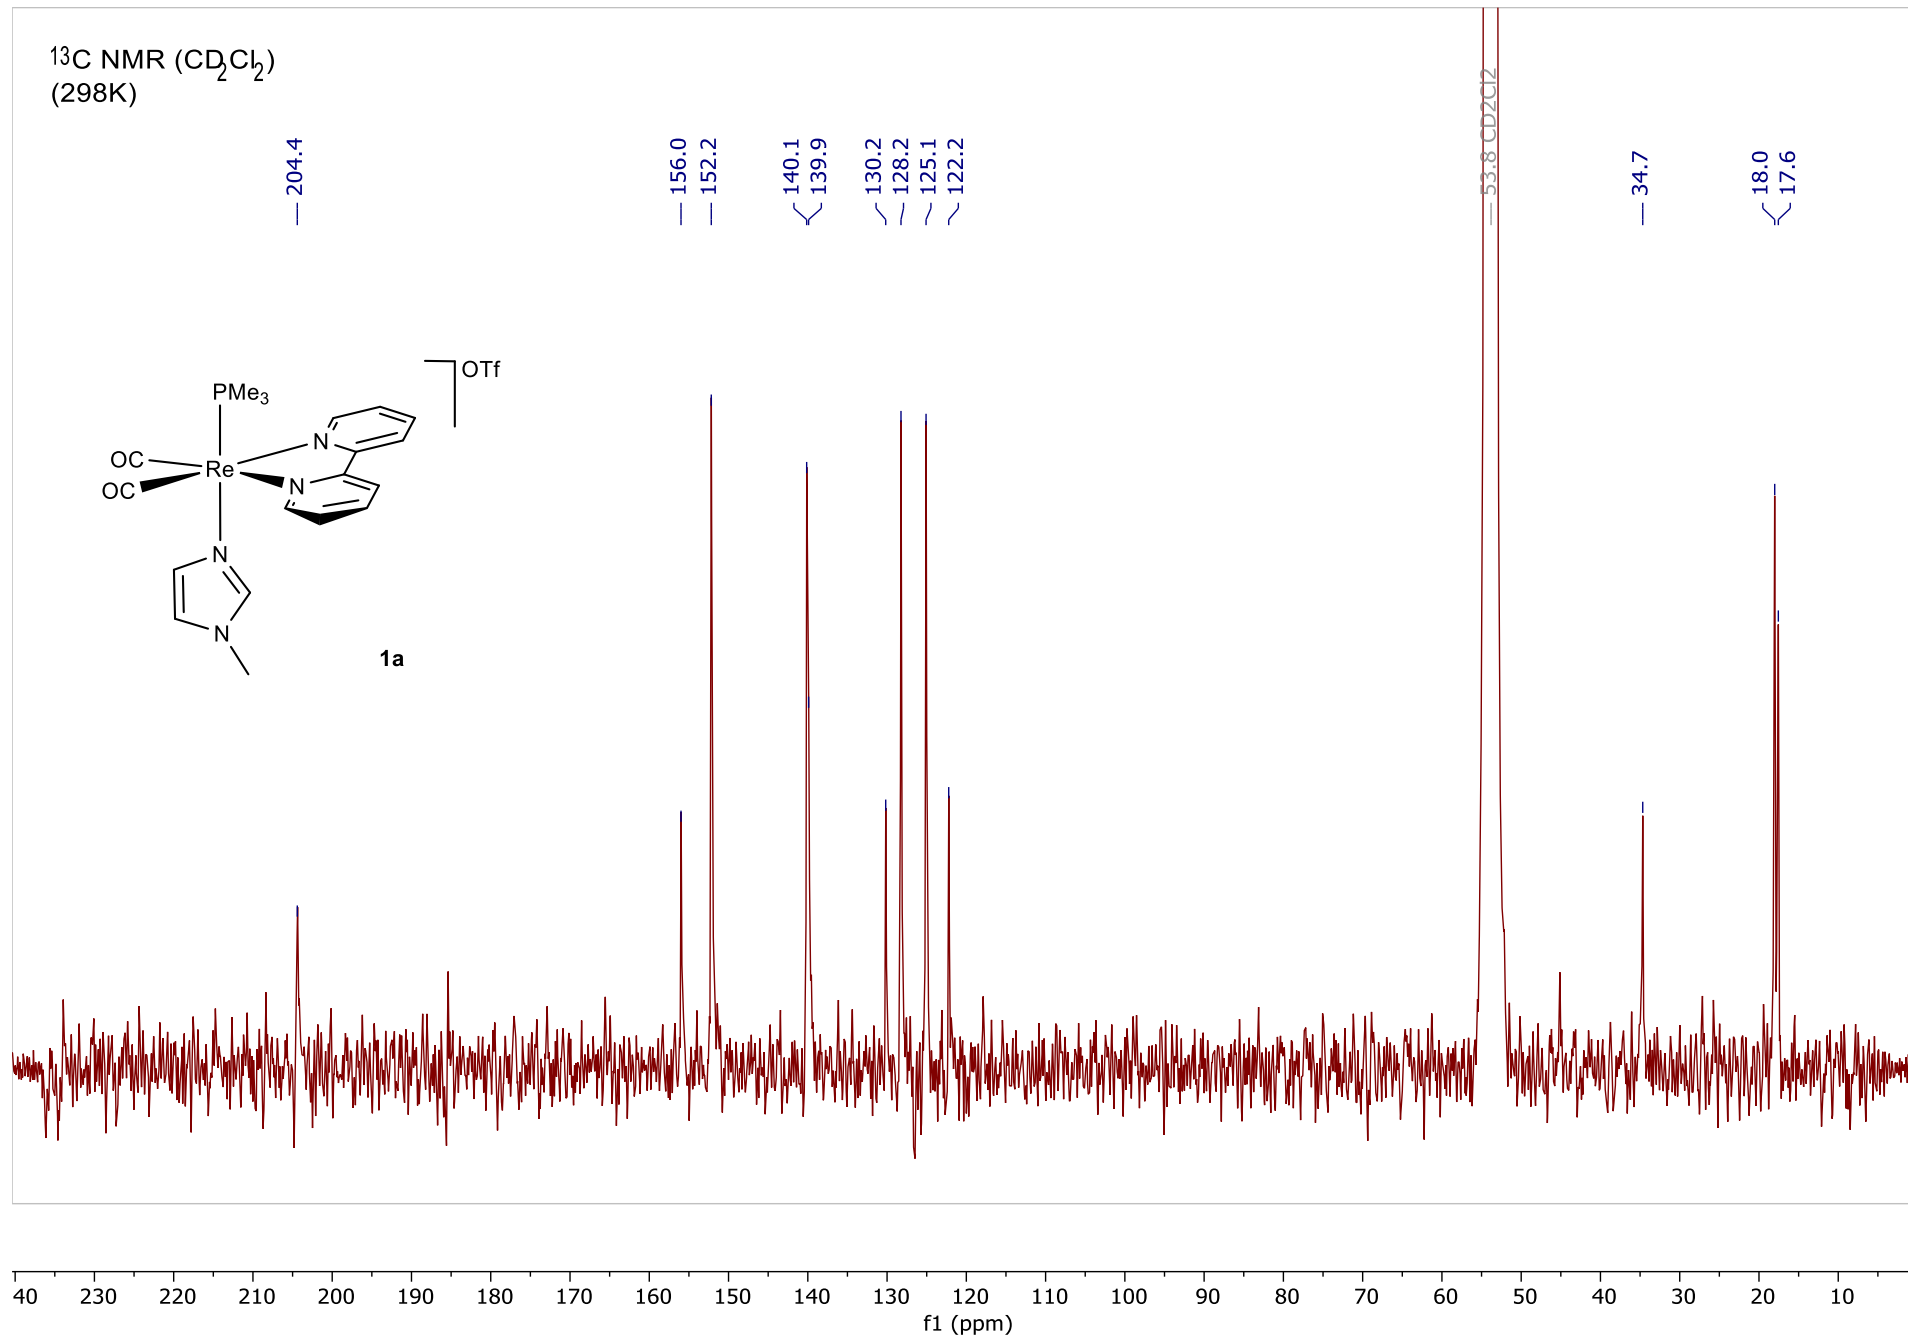

$^{31}\text{P}$  NMR ( $\text{CD}_2\text{Cl}_2$ )  
(298K)

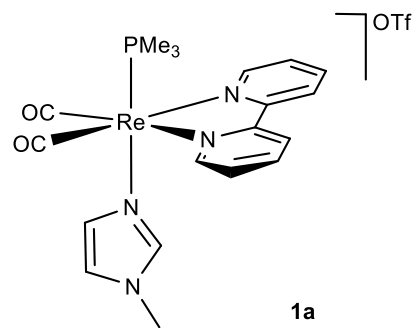

— -21.3

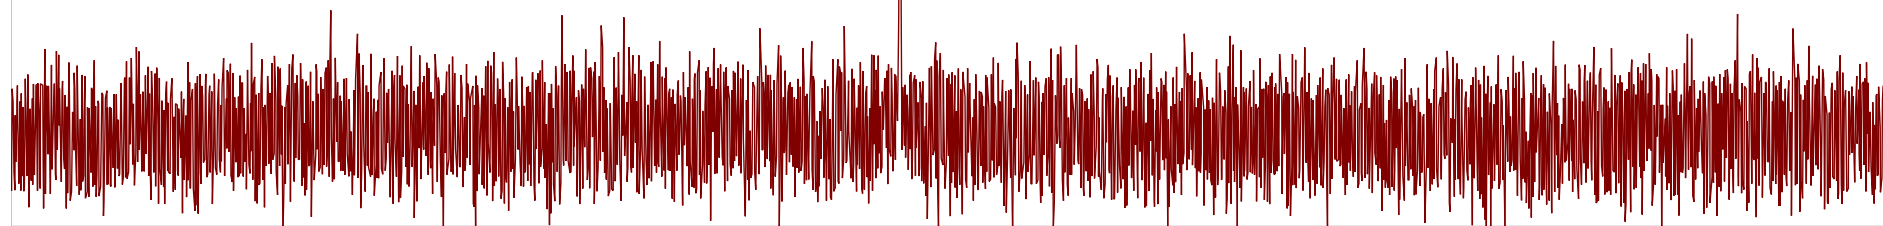

140 130 120 110 100 90 80 70 60 50 40 30 20 10 0 -10 -20 -30 -40 -50 -60 -70 -80 -90 -100 -110 -120 -130 -140 -150 -160 -170 -180 -190 -200  
f1 (ppm)

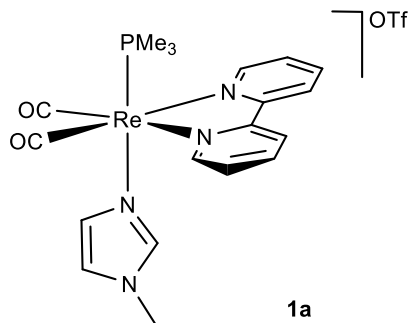

**1a**

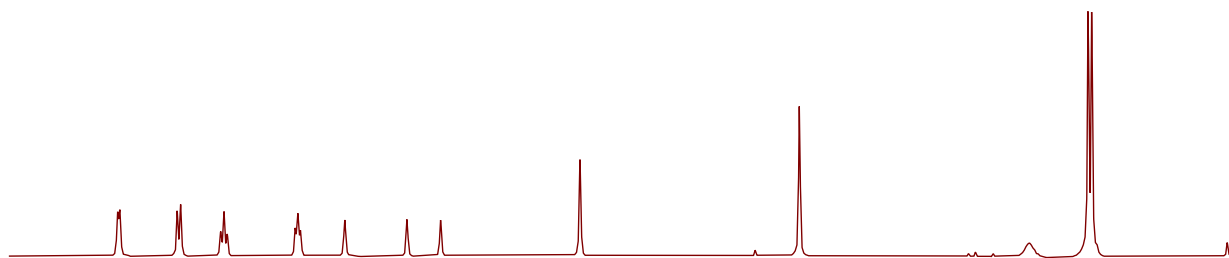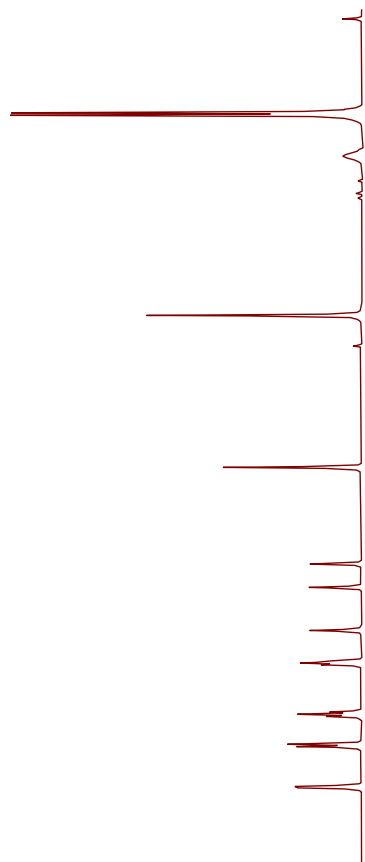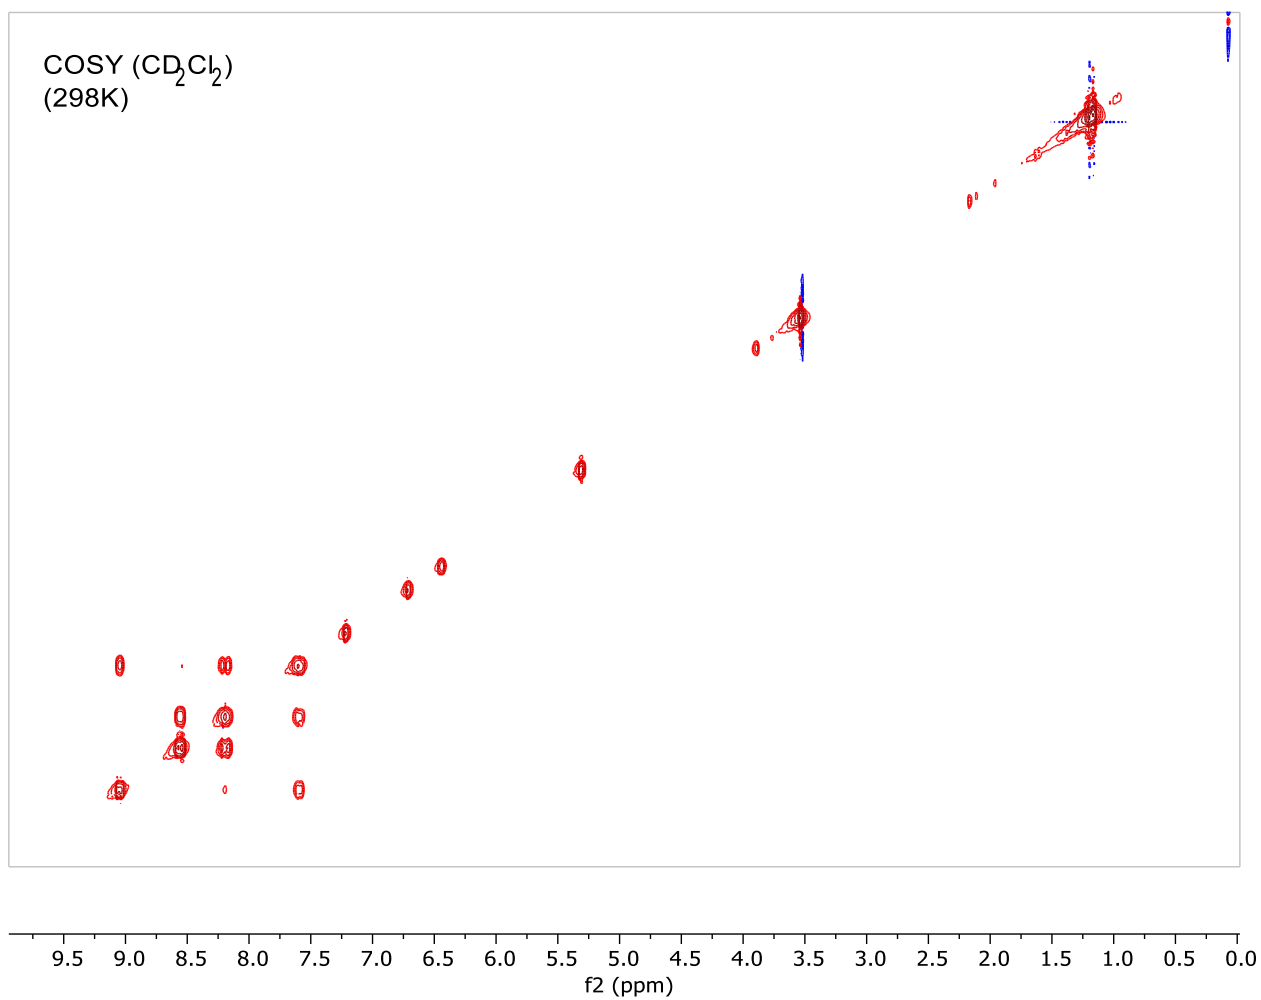



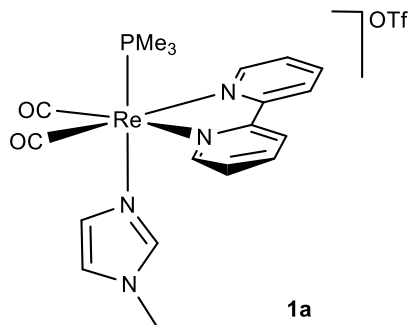

**1a**

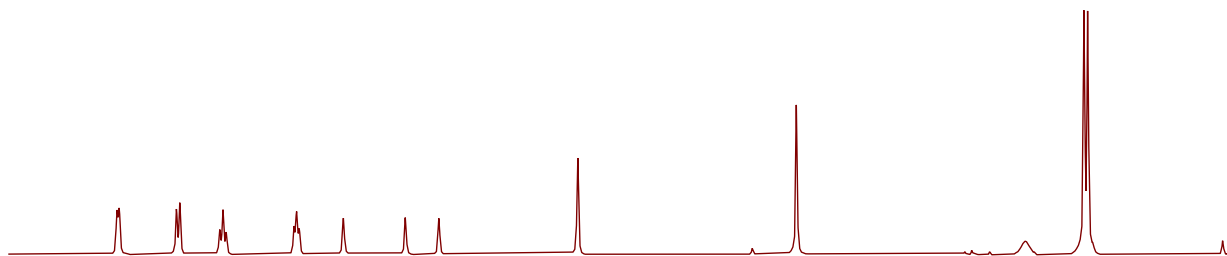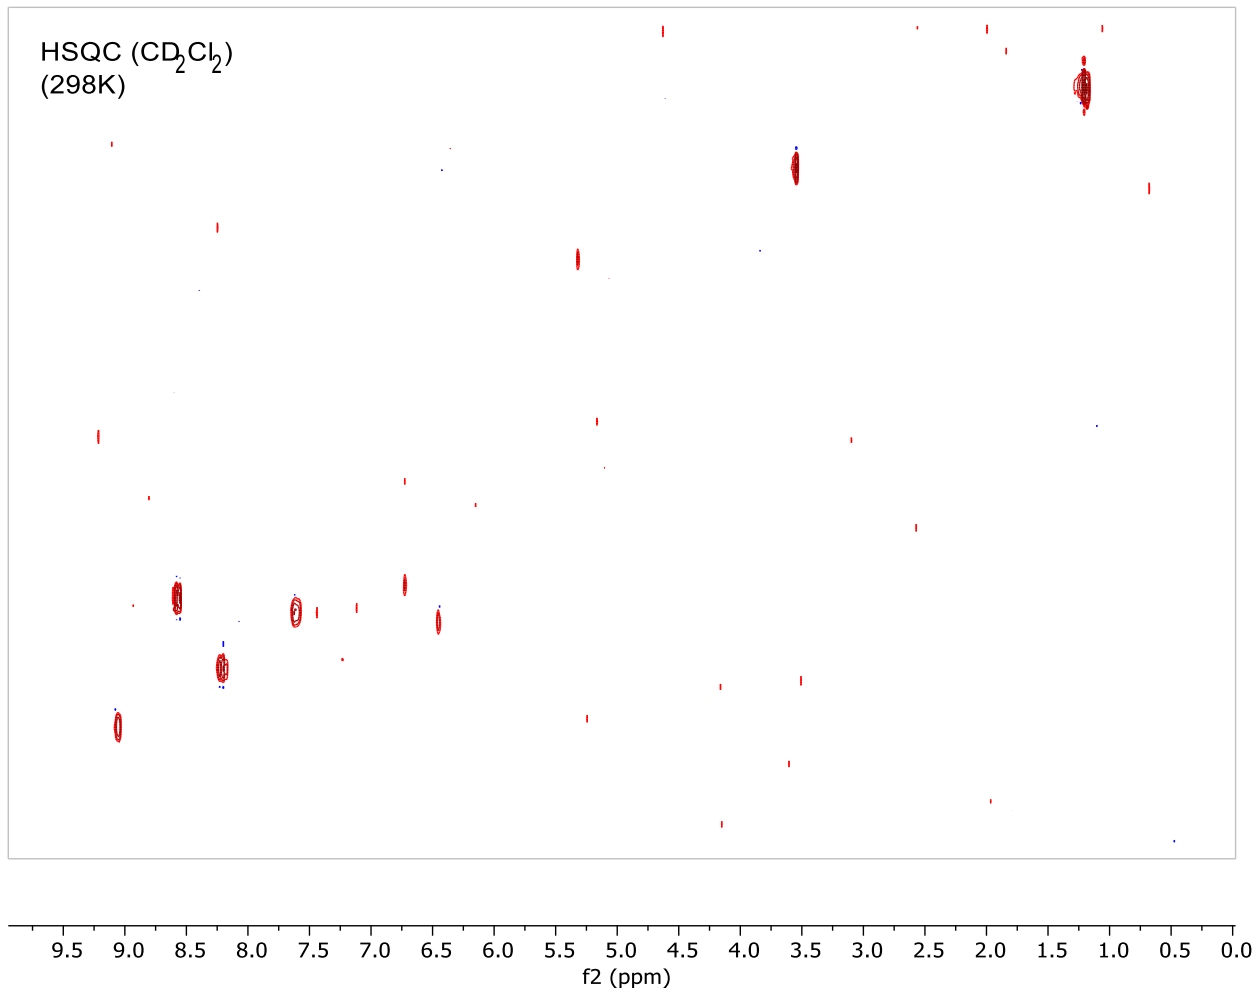

f1 (ppm)

f2 (ppm)

$^1\text{H}$  NMR ( $\text{CD}_2\text{Cl}_2$ )  
(298K)

— 5.32  $\text{CD}_2\text{Cl}_2$

9.09  
9.08  
8.63  
8.61  
8.23  
7.61  
7.24  
6.92  
6.72  
6.58

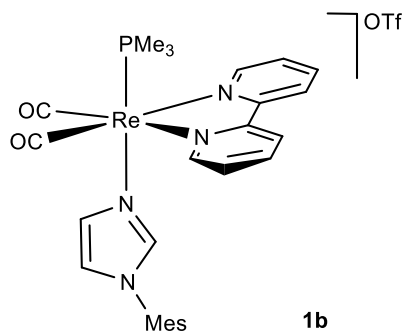

**1b**

2.28  
1.69  
1.25  
1.23

2.00  
2.30  
2.31  
2.30  
0.87  
1.93  
0.95  
0.92

3.01  
6.07  
9.20

9.5 9.0 8.5 8.0 7.5 7.0 6.5 6.0 5.5 5.0 4.5 4.0 3.5 3.0 2.5 2.0 1.5 1.0 0.5  
f1 (ppm)

$^{13}\text{C}$  NMR ( $\text{CD}_2\text{Cl}_2$ )  
(298K)

204.4  
204.4

156.1  
152.2

140.5  
140.5  
139.8  
135.1  
132.0  
130.2  
129.6  
128.4  
125.3  
122.6

21.1  
18.1  
17.7  
17.2

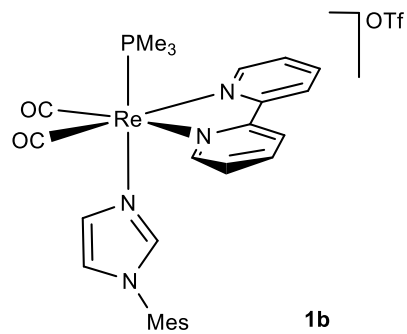

**1b**

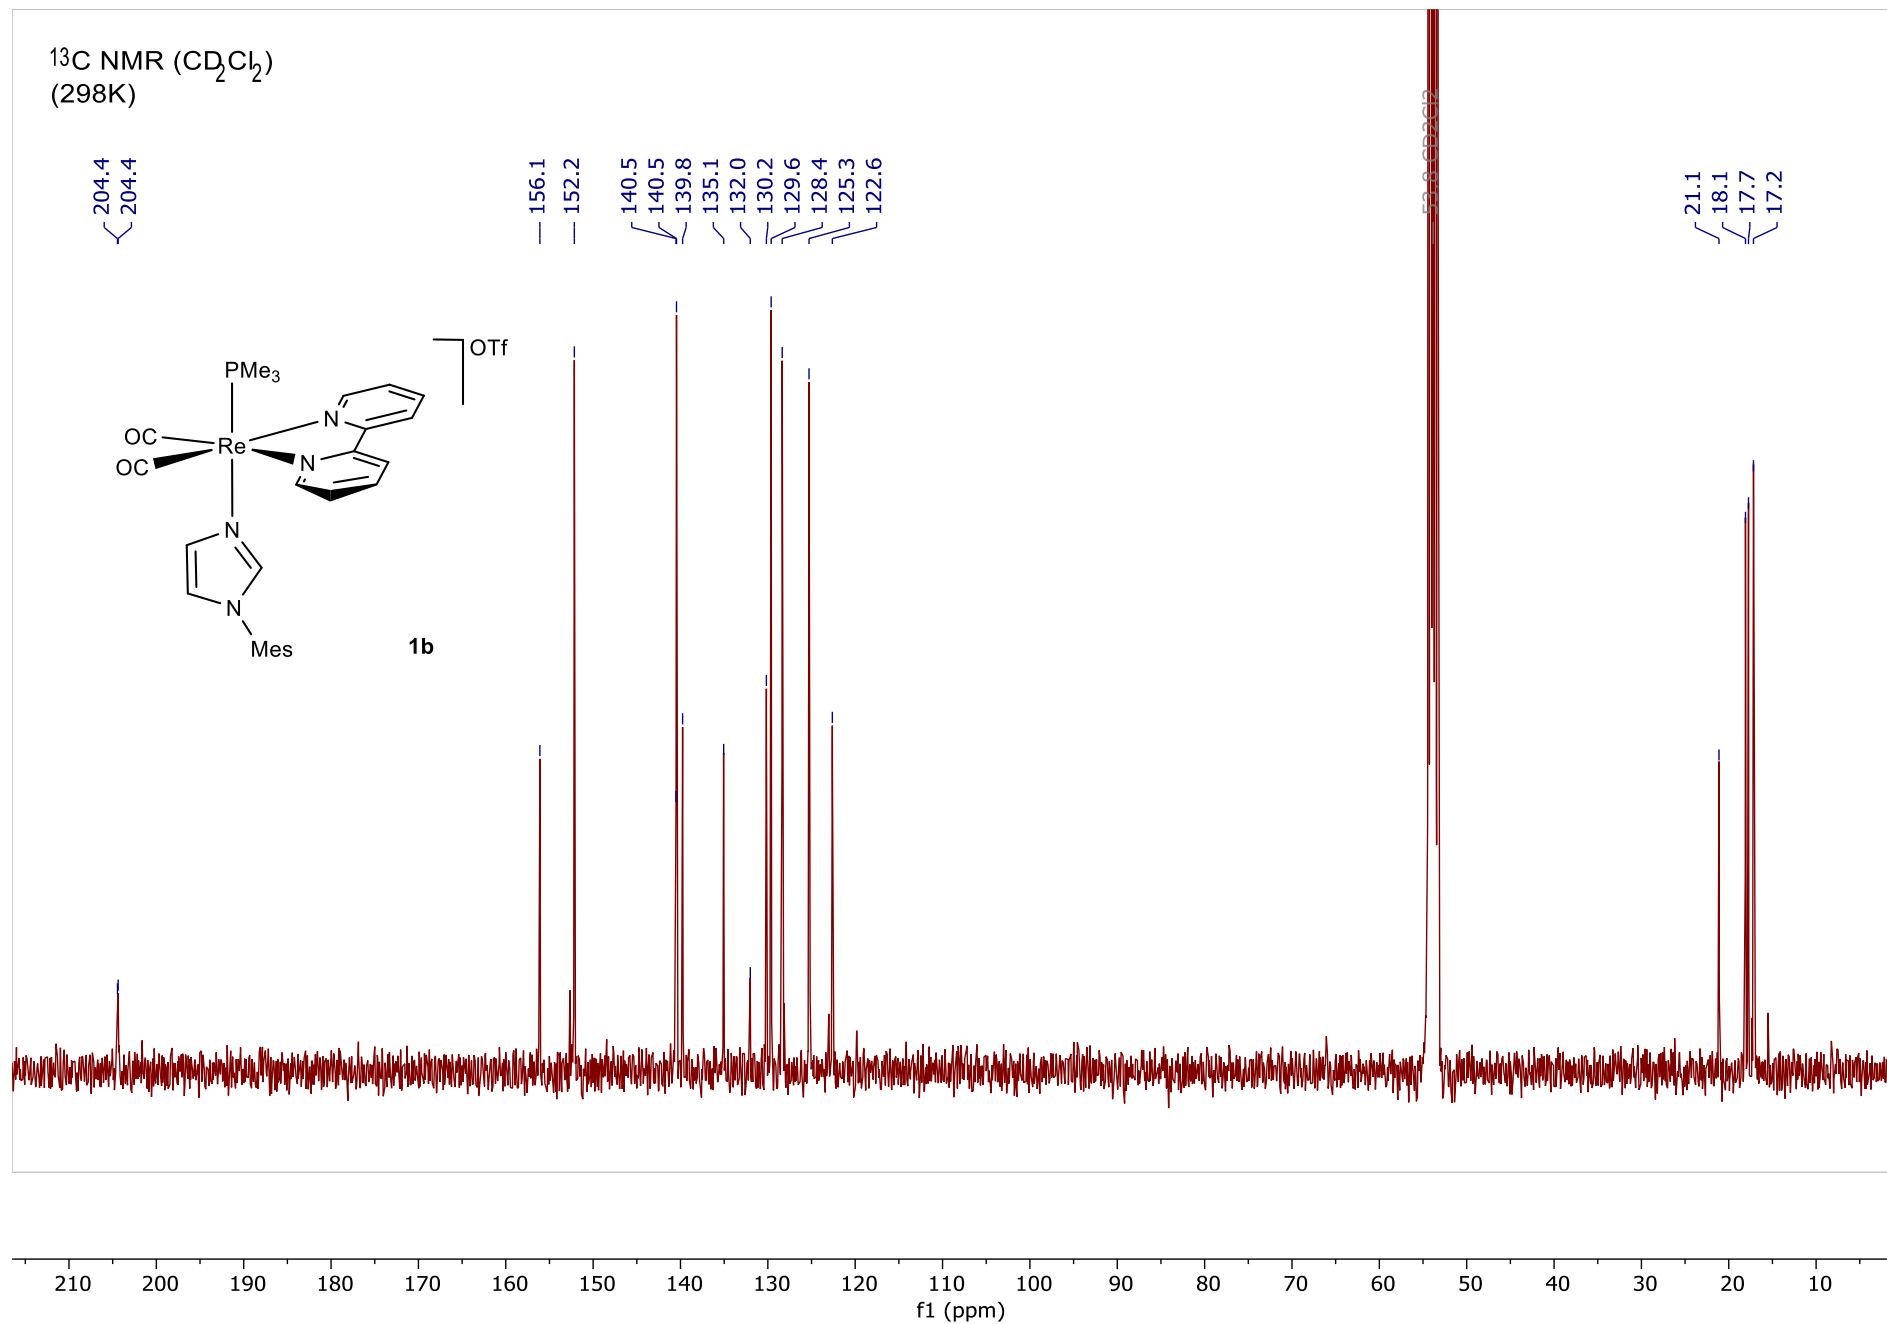

$^{31}\text{P}$  NMR ( $\text{CD}_2\text{Cl}_2$ )  
(298K)

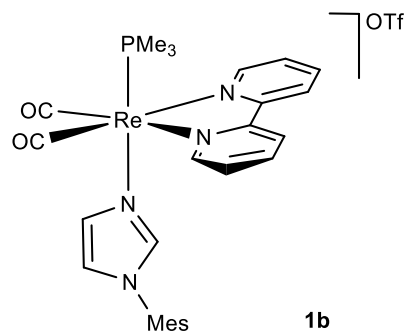

— -21.2

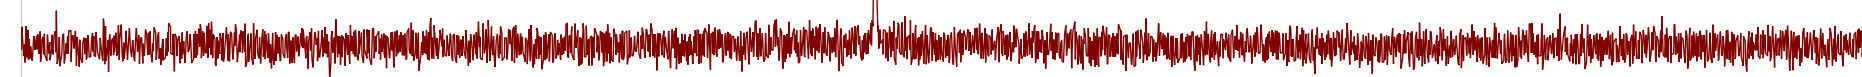

130 120 110 100 90 80 70 60 50 40 30 20 10 0 -10 -20 -30 -40 -50 -60 -70 -80 -90 -100 -110 -120 -130 -140 -150 -160 -170 -180 -190 -200  
f1 (ppm)

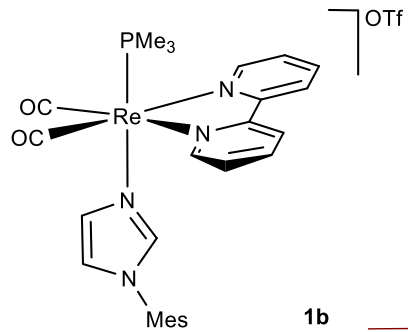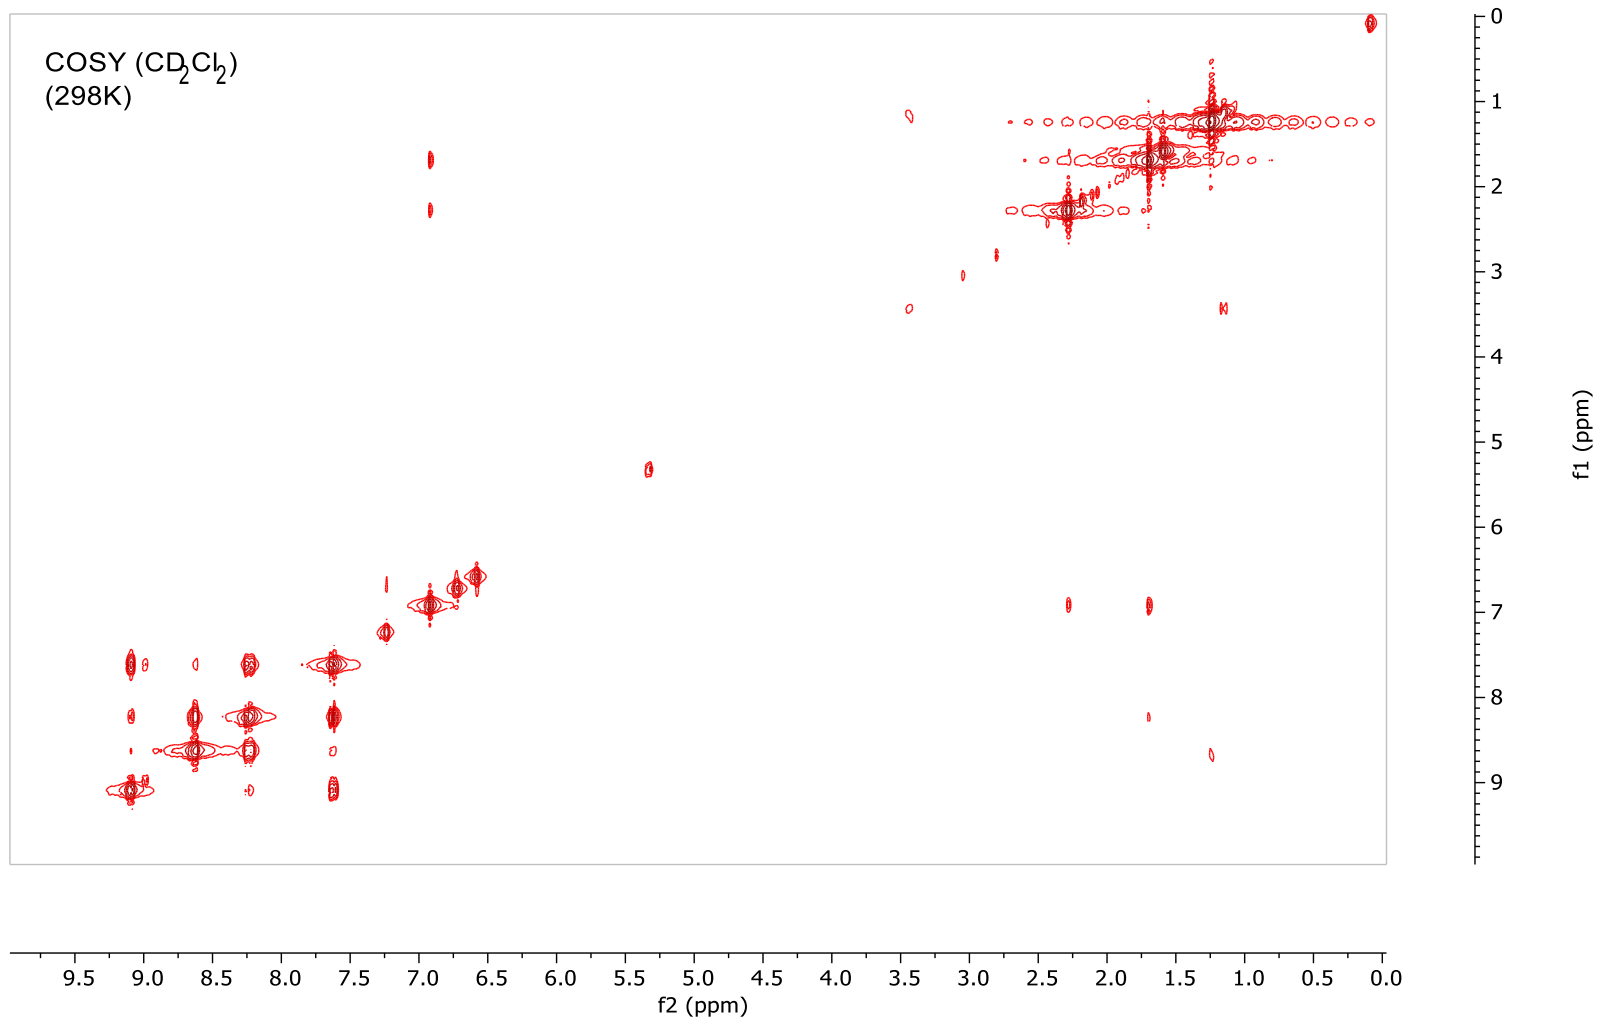

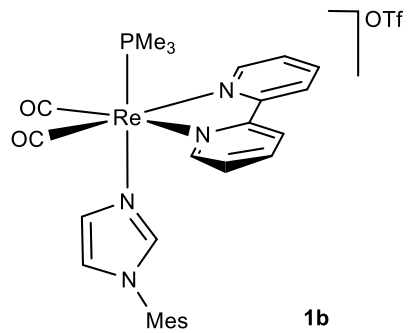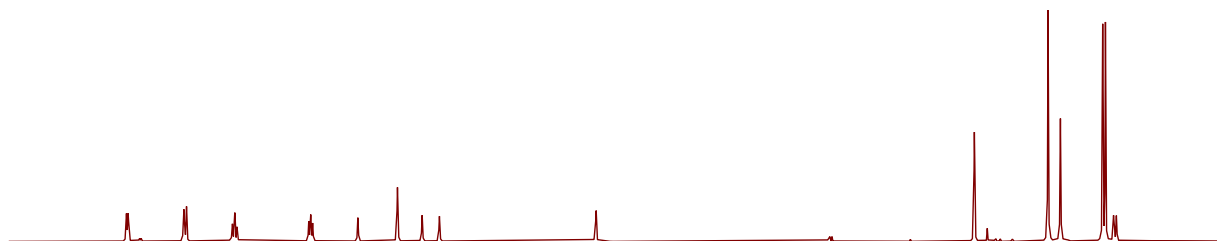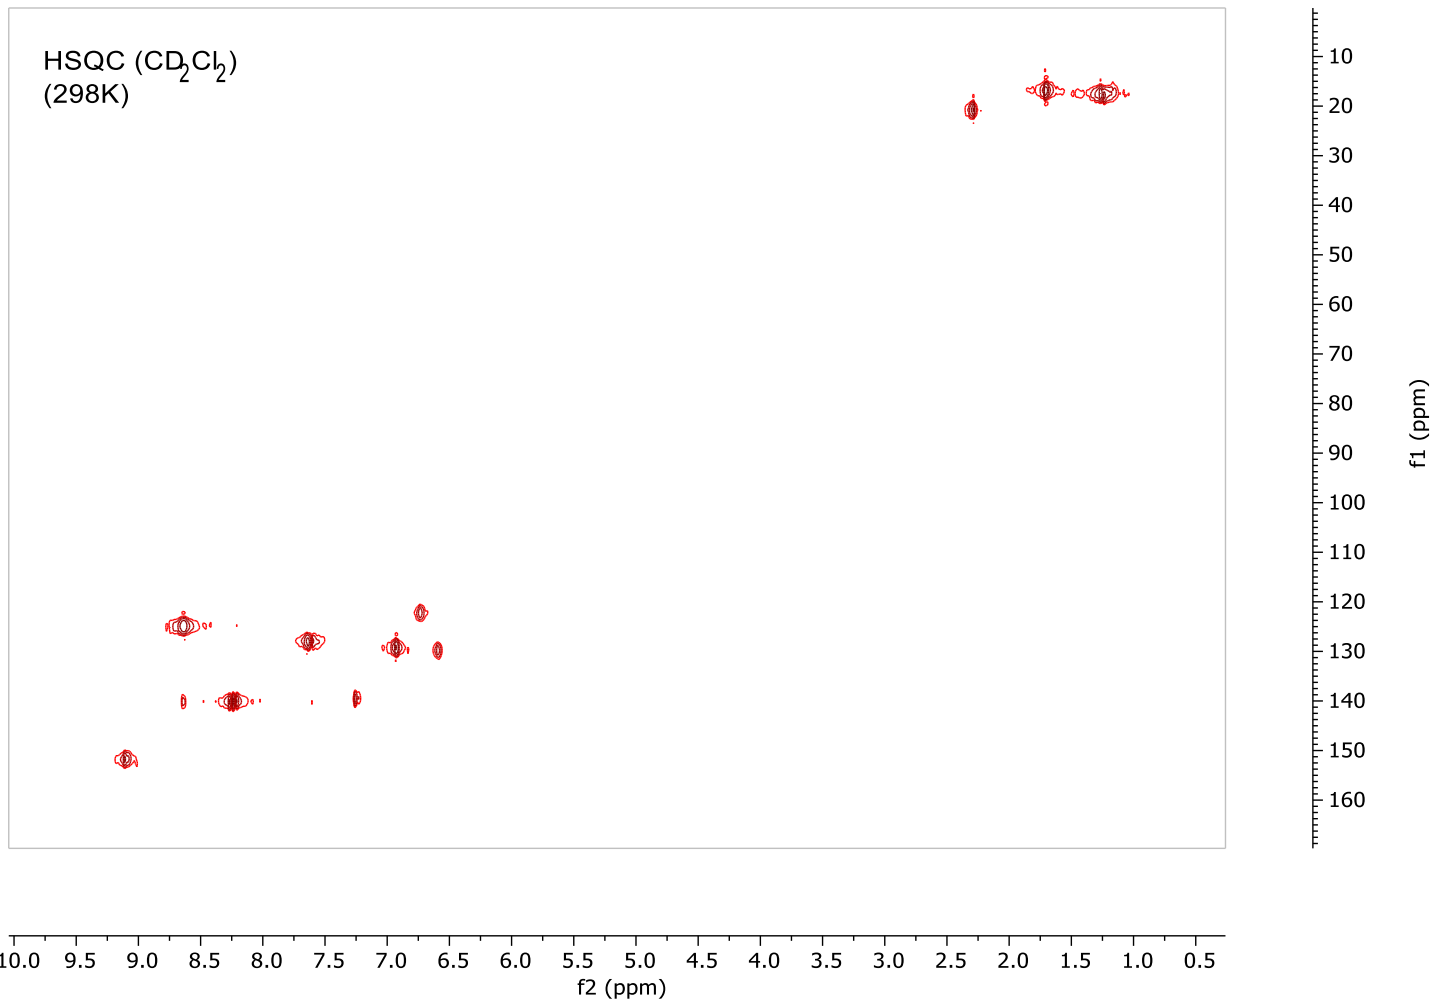

$^1\text{H NMR}$  ( $\text{CD}_2\text{Cl}_2$ )  
(298K)

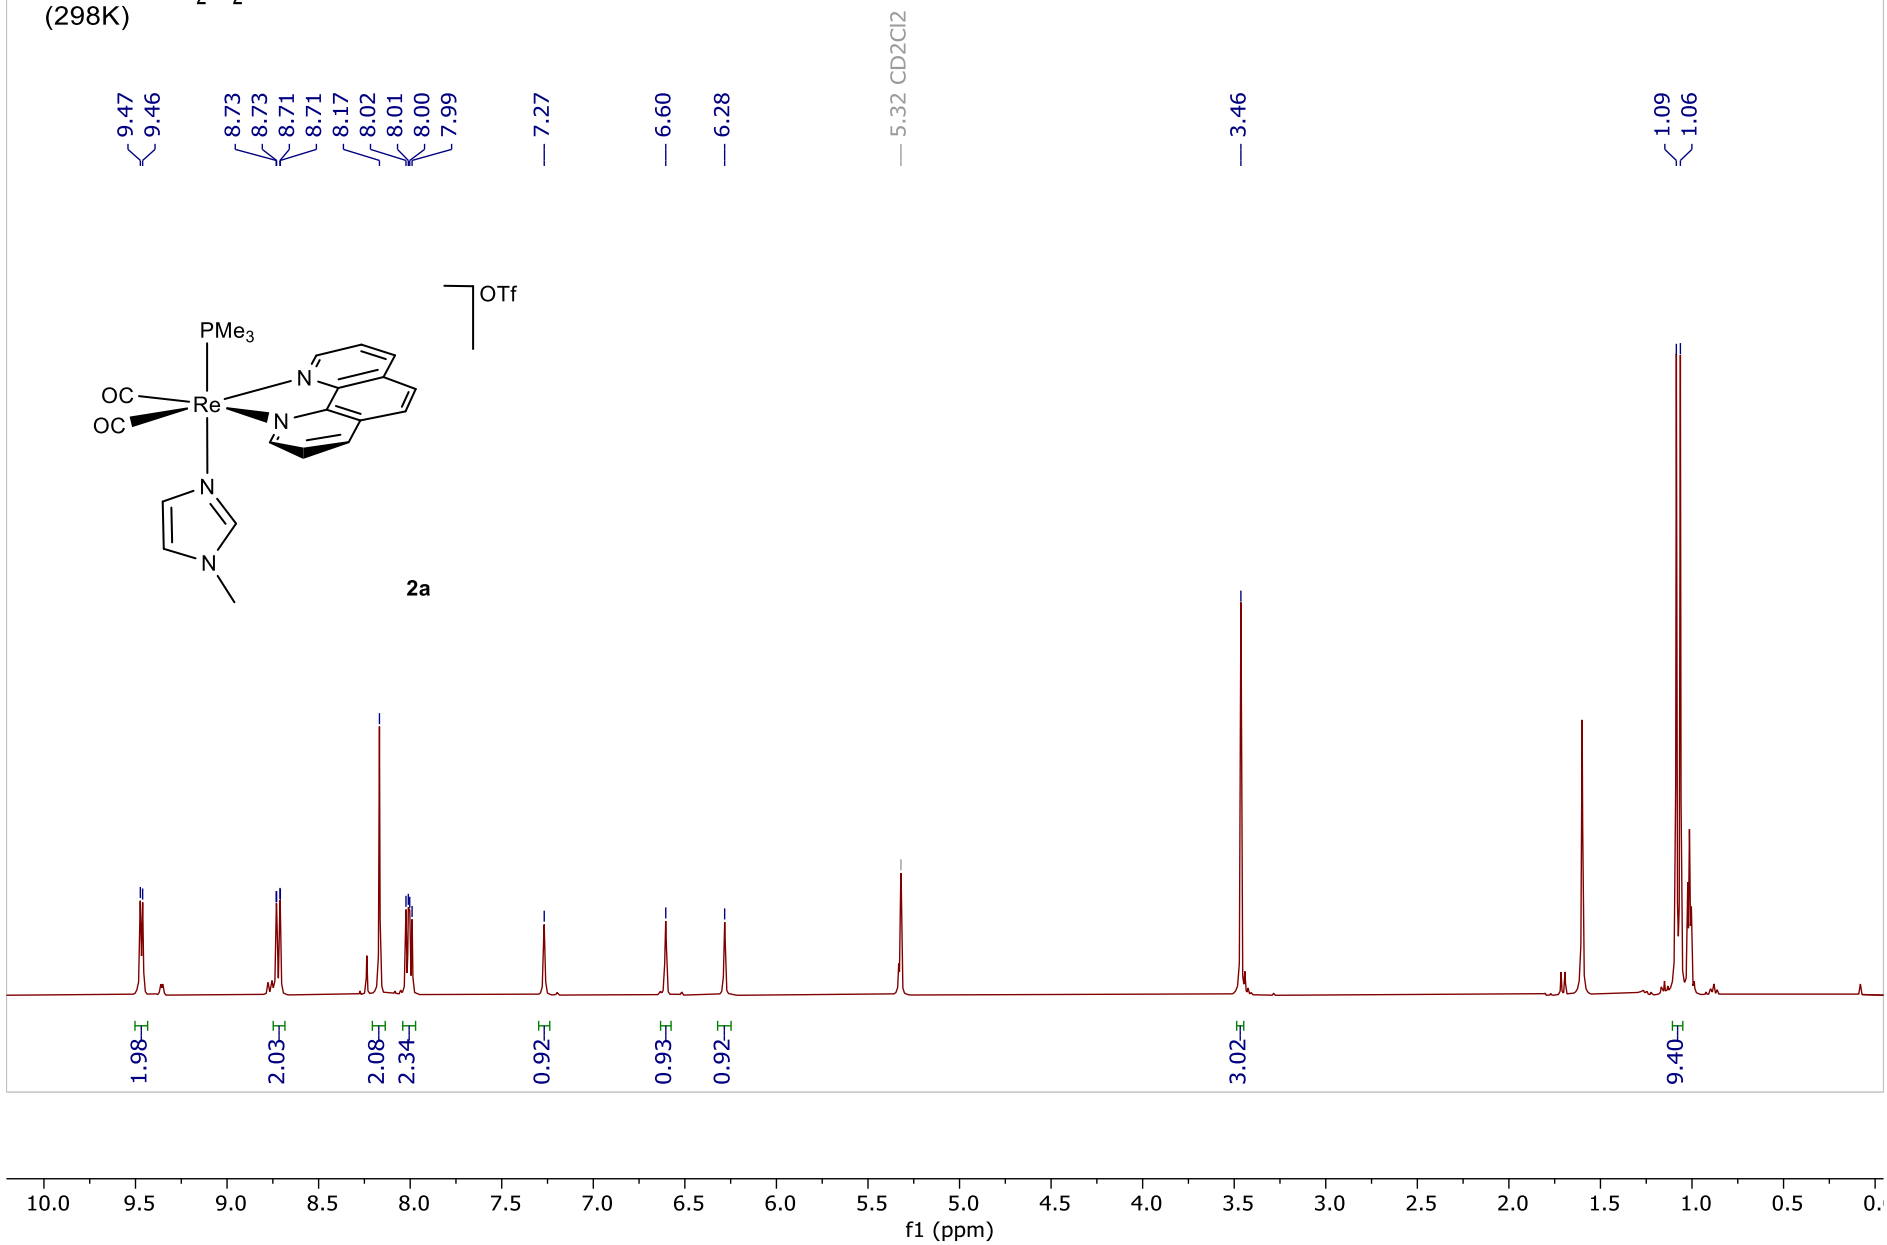

$^{13}\text{C}$  NMR ( $\text{CD}_2\text{Cl}_2$ )  
(298K)

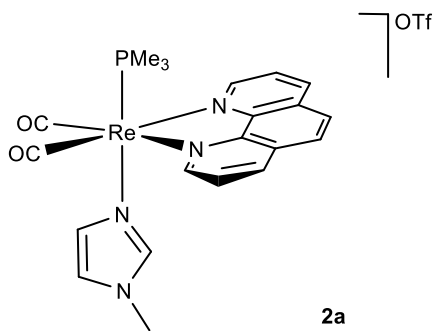

— 204.4  
— 153.0  
— 147.1  
— 140.3  
— 139.4  
— 131.5  
— 129.9  
— 128.8  
— 127.1  
— 122.3

— 34.8  
— 18.0  
— 17.7

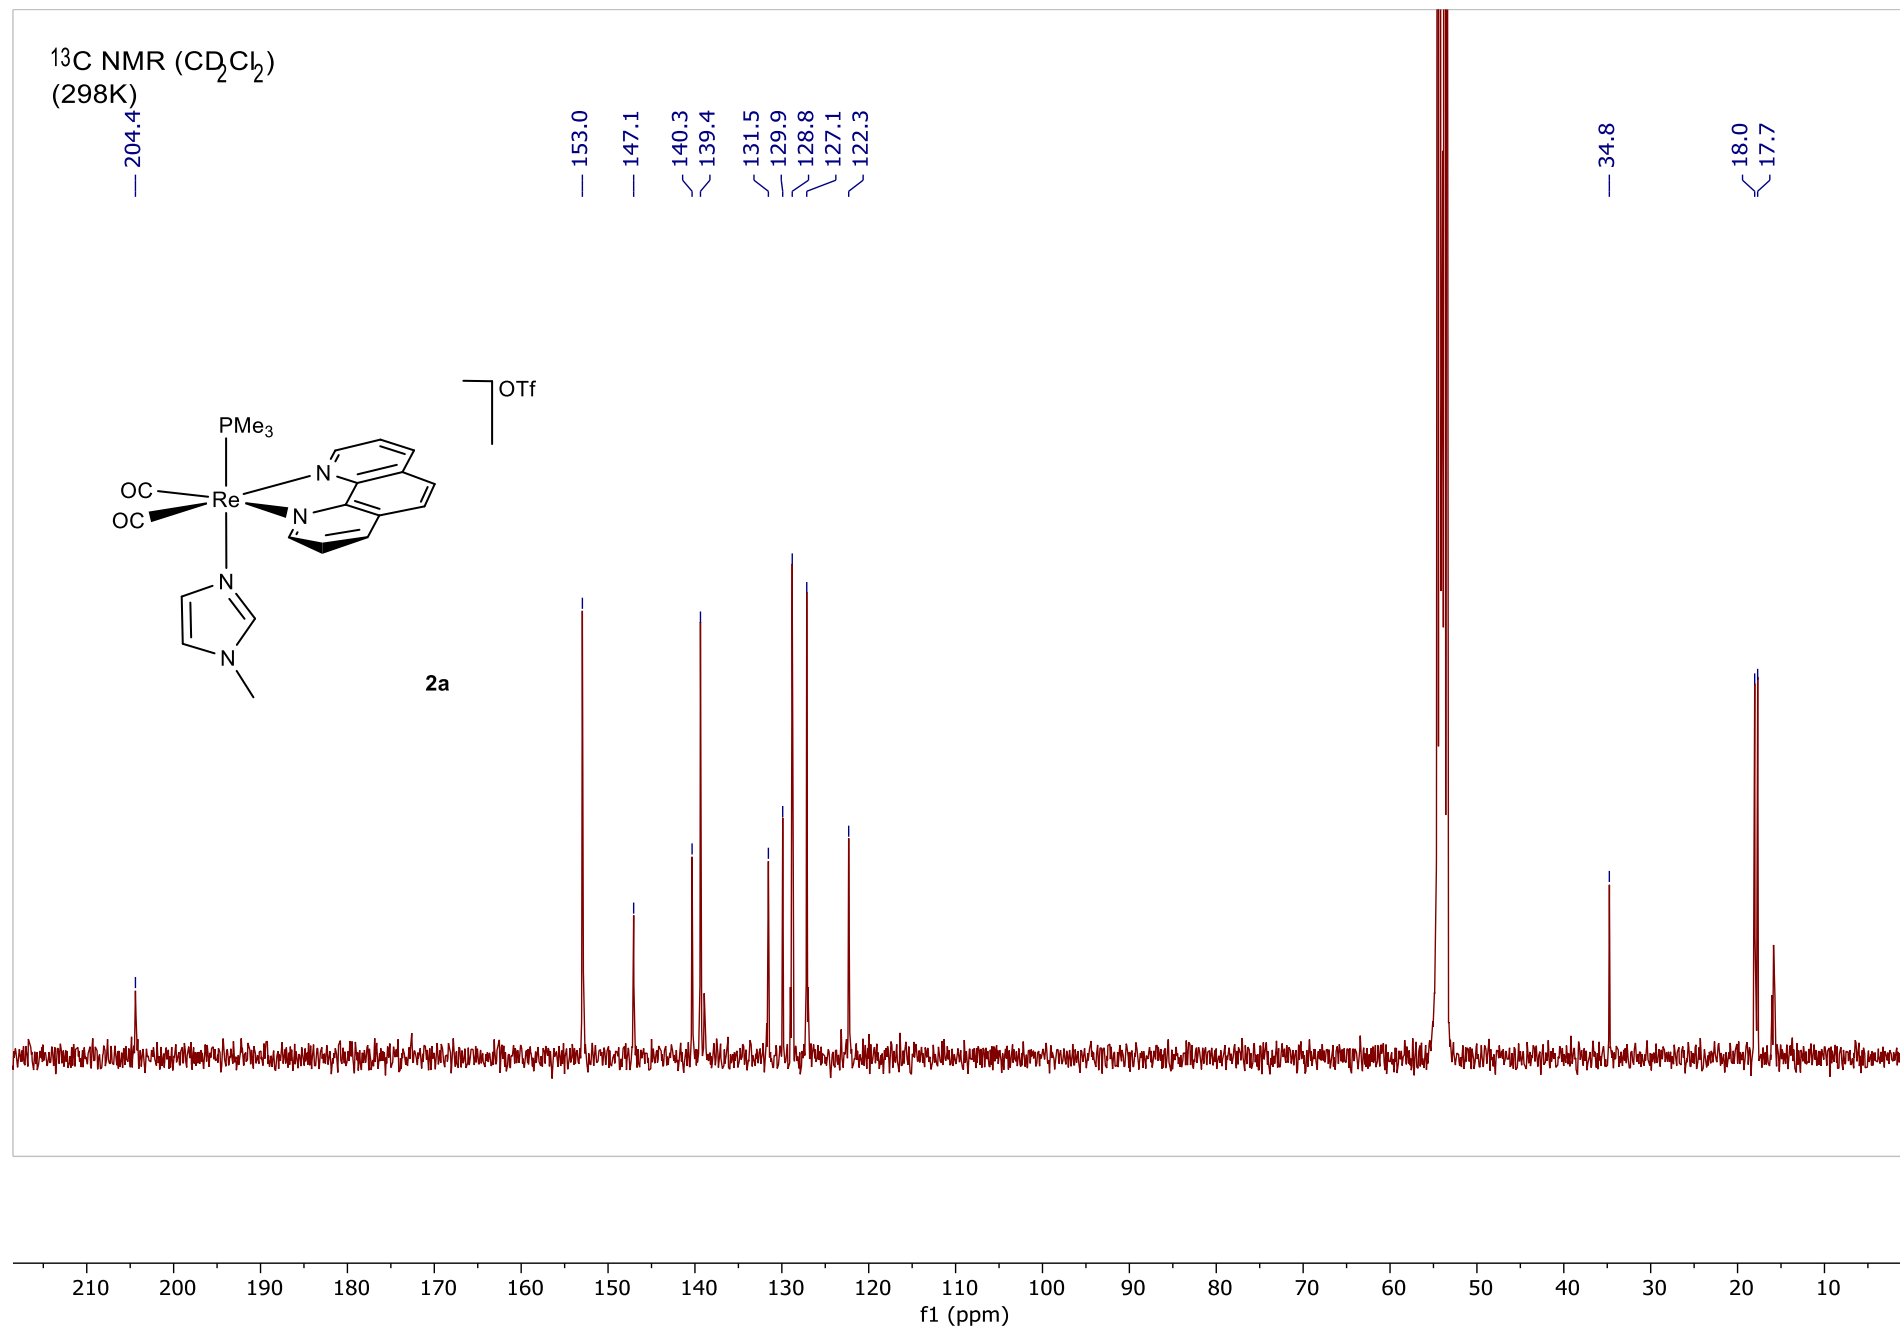



$^{31}\text{P}$  NMR ( $\text{CD}_2\text{Cl}_2$ )  
(298K)

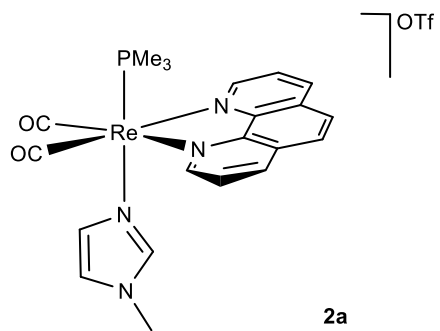

-21.6

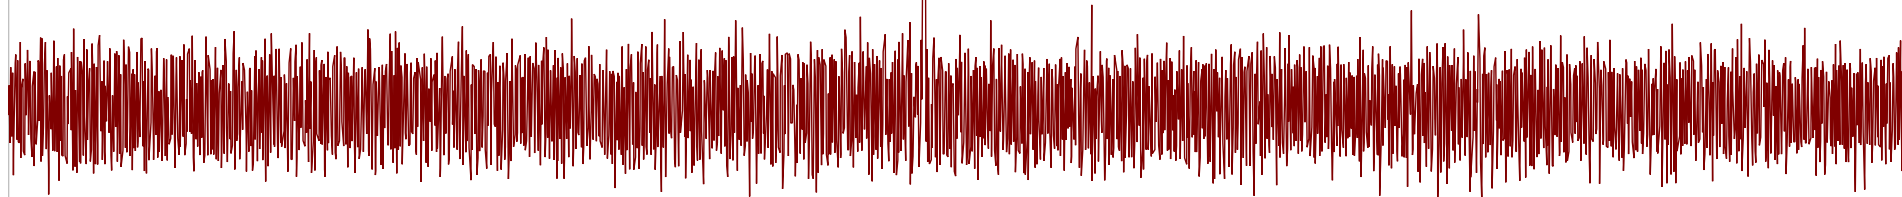

130 120 110 100 90 80 70 60 50 40 30 20 10 0 -10 -20 -30 -40 -50 -60 -70 -80 -90 -100 -110 -120 -130 -140 -150 -160 -170 -180  
f1 (ppm)

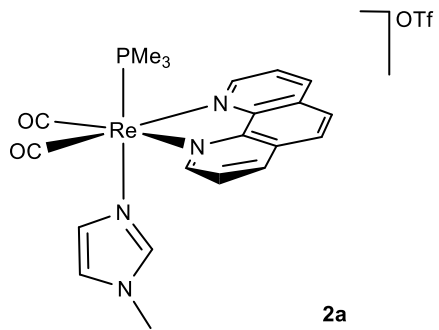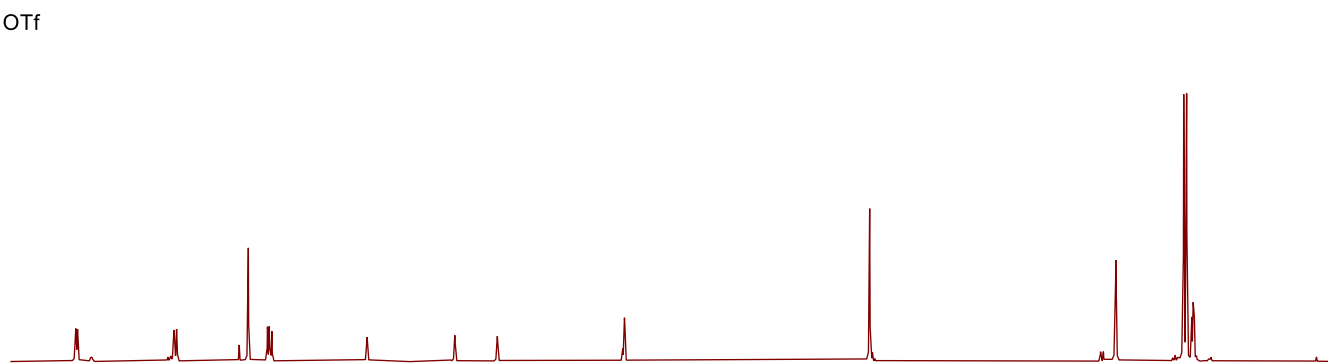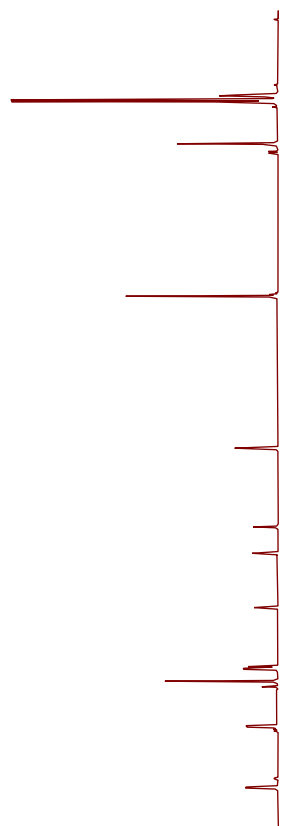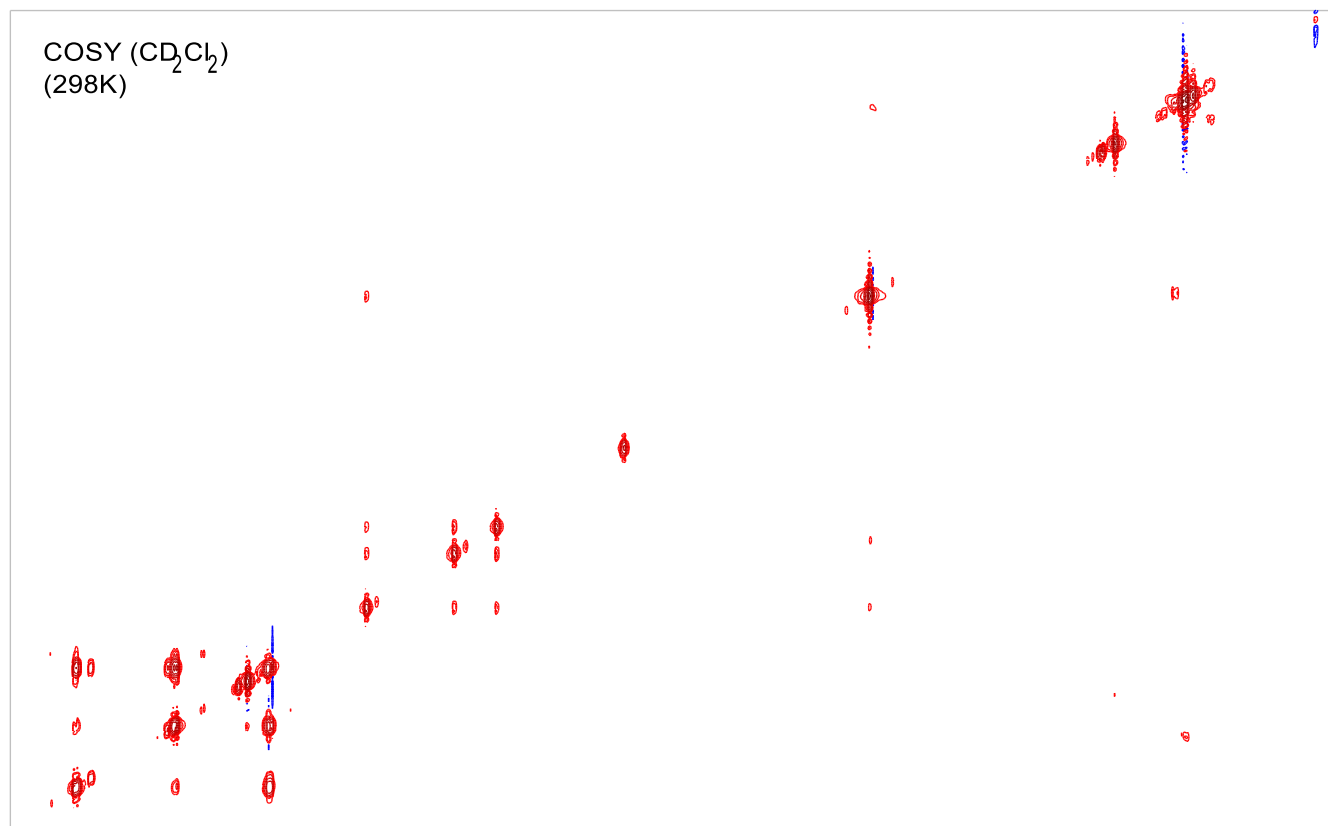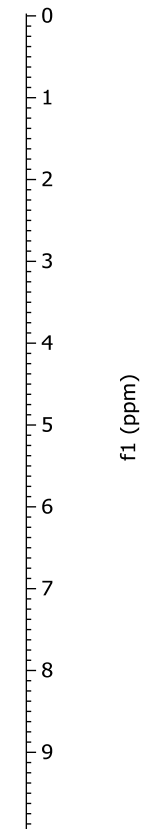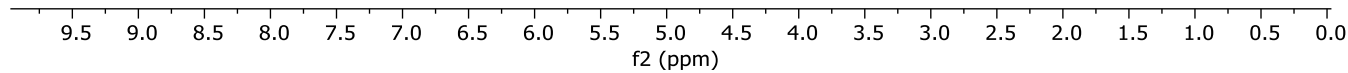

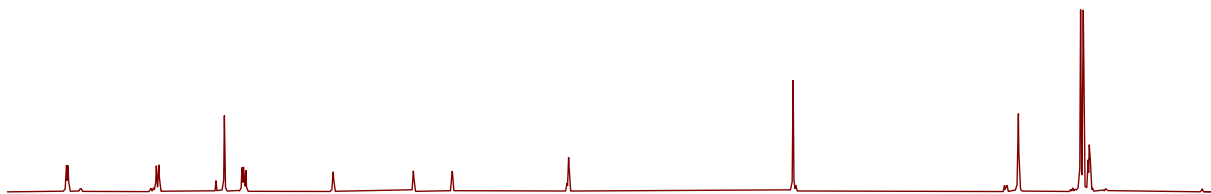

HSQC (CD<sub>2</sub>Cl<sub>2</sub>)  
(298K)

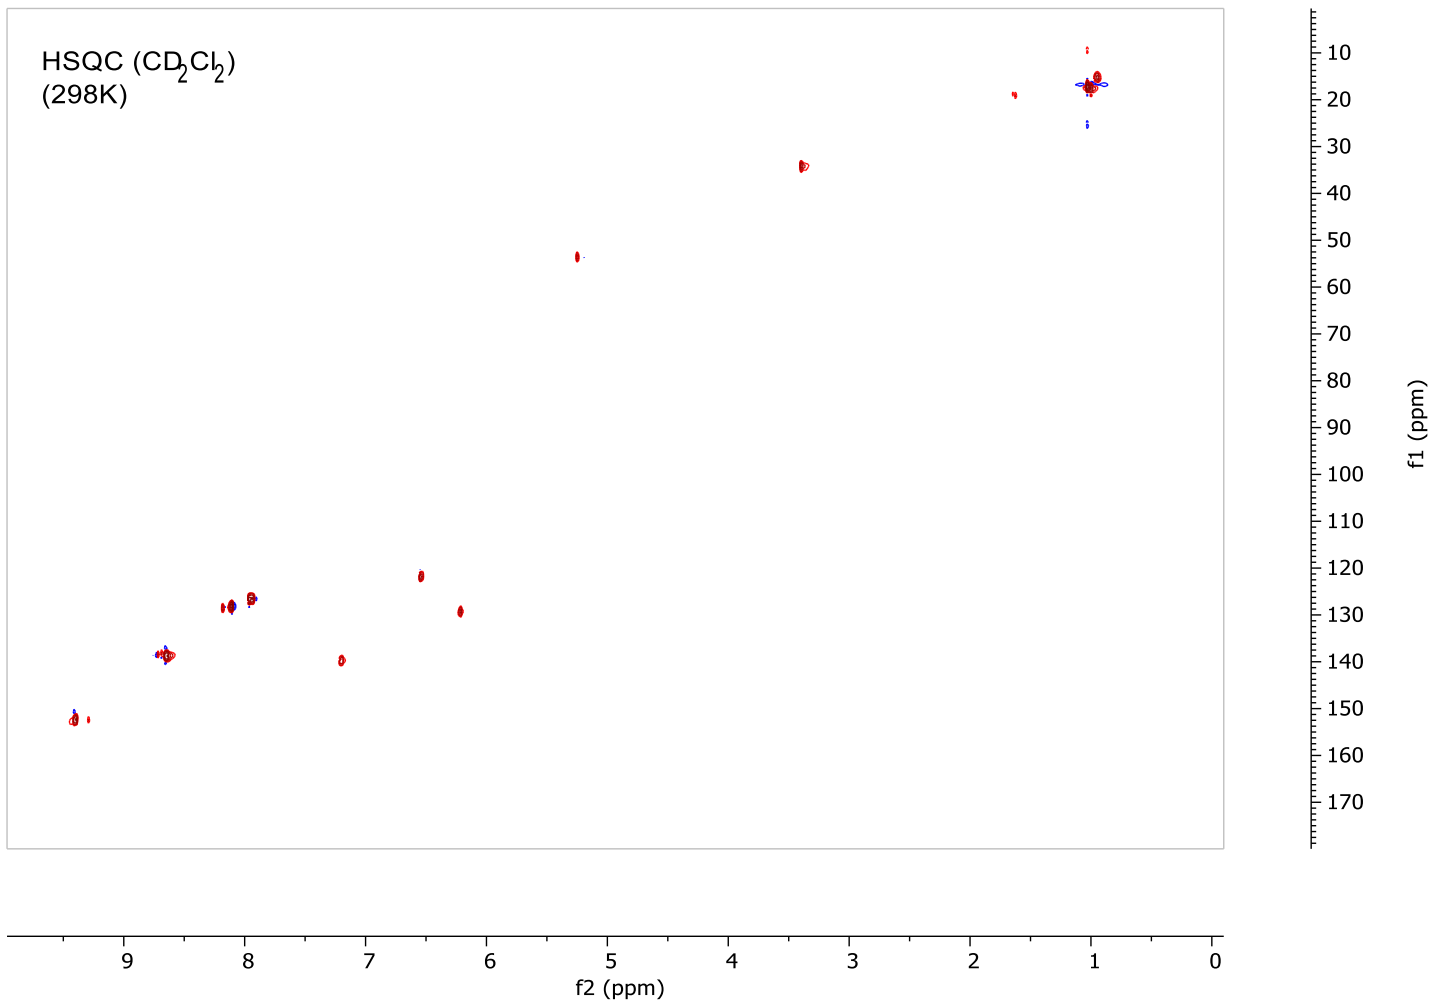

$^1\text{H}$  NMR ( $\text{CD}_2\text{Cl}_2$ )  
(298K)

9.50  
9.48  
8.77  
8.75  
8.75  
8.20  
8.04  
8.03  
8.02  
8.00

7.10  
6.85  
6.57  
6.47

2.24

1.50

1.16  
1.14

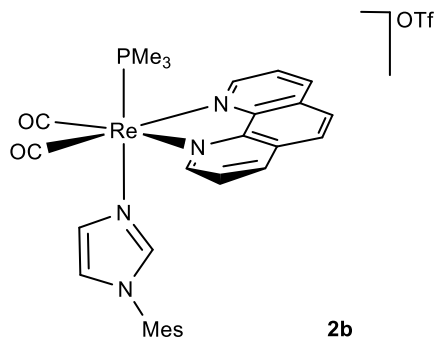

**2b**

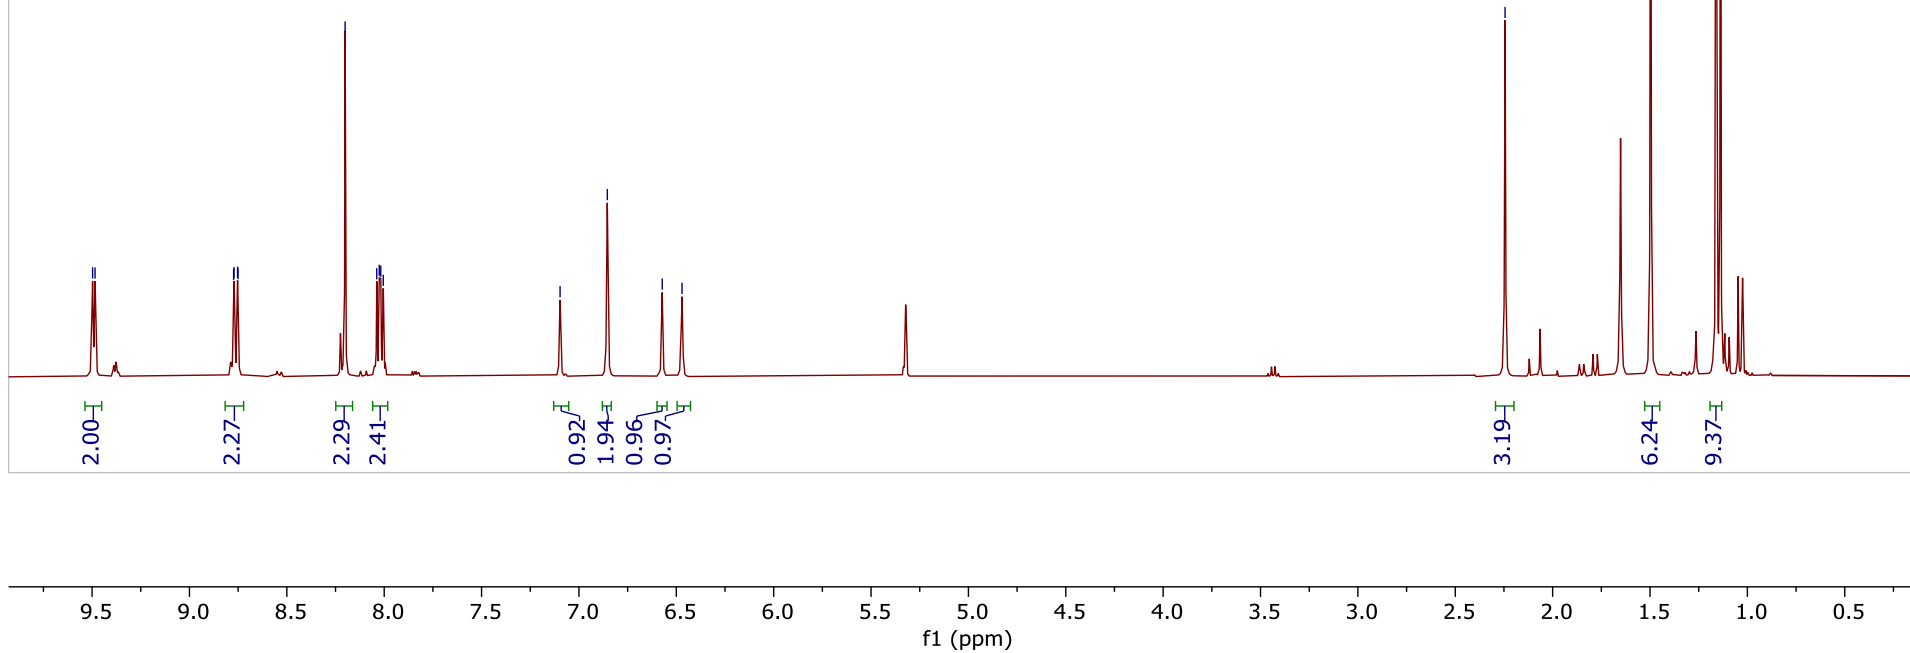

$^{13}\text{C}$  NMR ( $\text{CD}_2\text{Cl}_2$ )  
(298K)

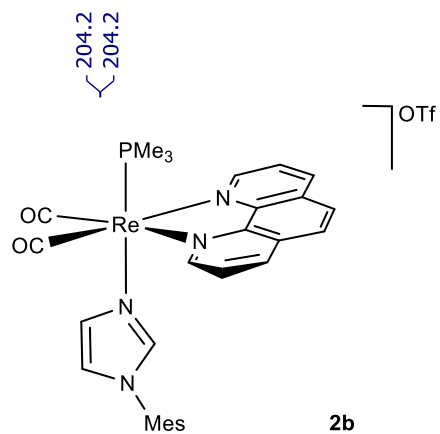

— 152.7  
— 146.8  
— 139.5  
— 139.4  
— 134.9  
— 131.8  
— 131.4  
— 130.1  
— 129.5  
— 128.7  
— 127.0  
— 122.4

— 21.1  
— 18.0  
— 17.6  
— 17.1

53.6, 53.6, 53.6

210 200 190 180 170 160 150 140 130 120 110 100 90 80 70 60 50 40 30 20 1  
f1 (ppm)

$^{31}\text{P}$  NMR ( $\text{CD}_2\text{Cl}_2$ )  
(298K)

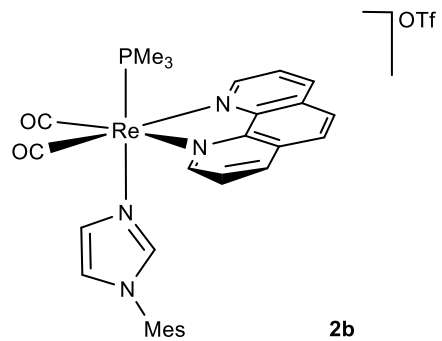

— -21.7

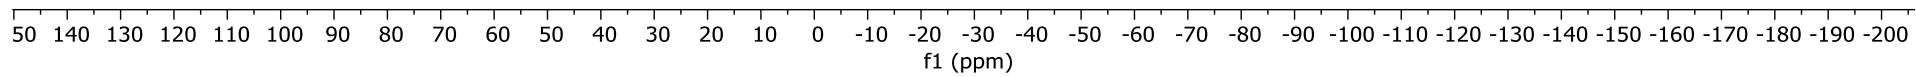

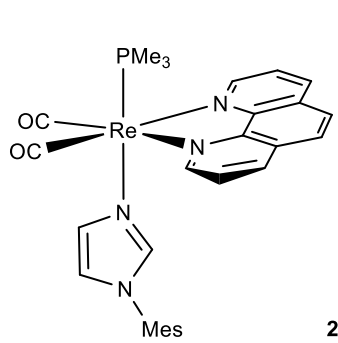

**2b**

OTf

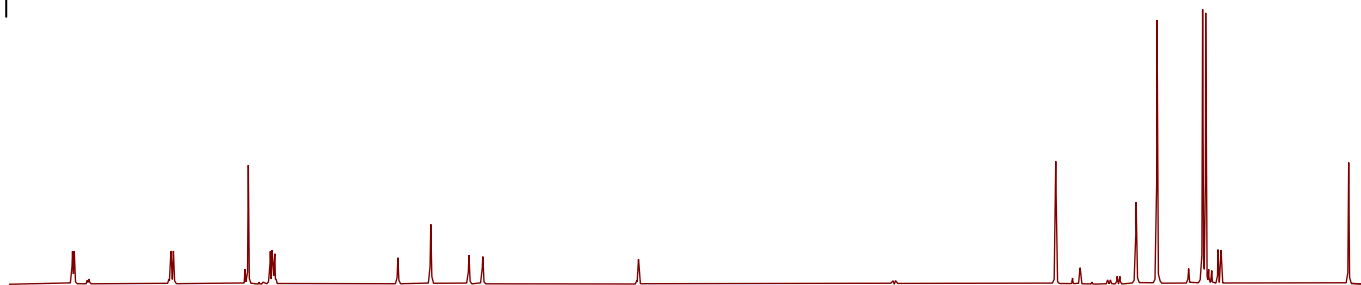

COSY (CD<sub>2</sub>Cl<sub>2</sub>)  
(298K)

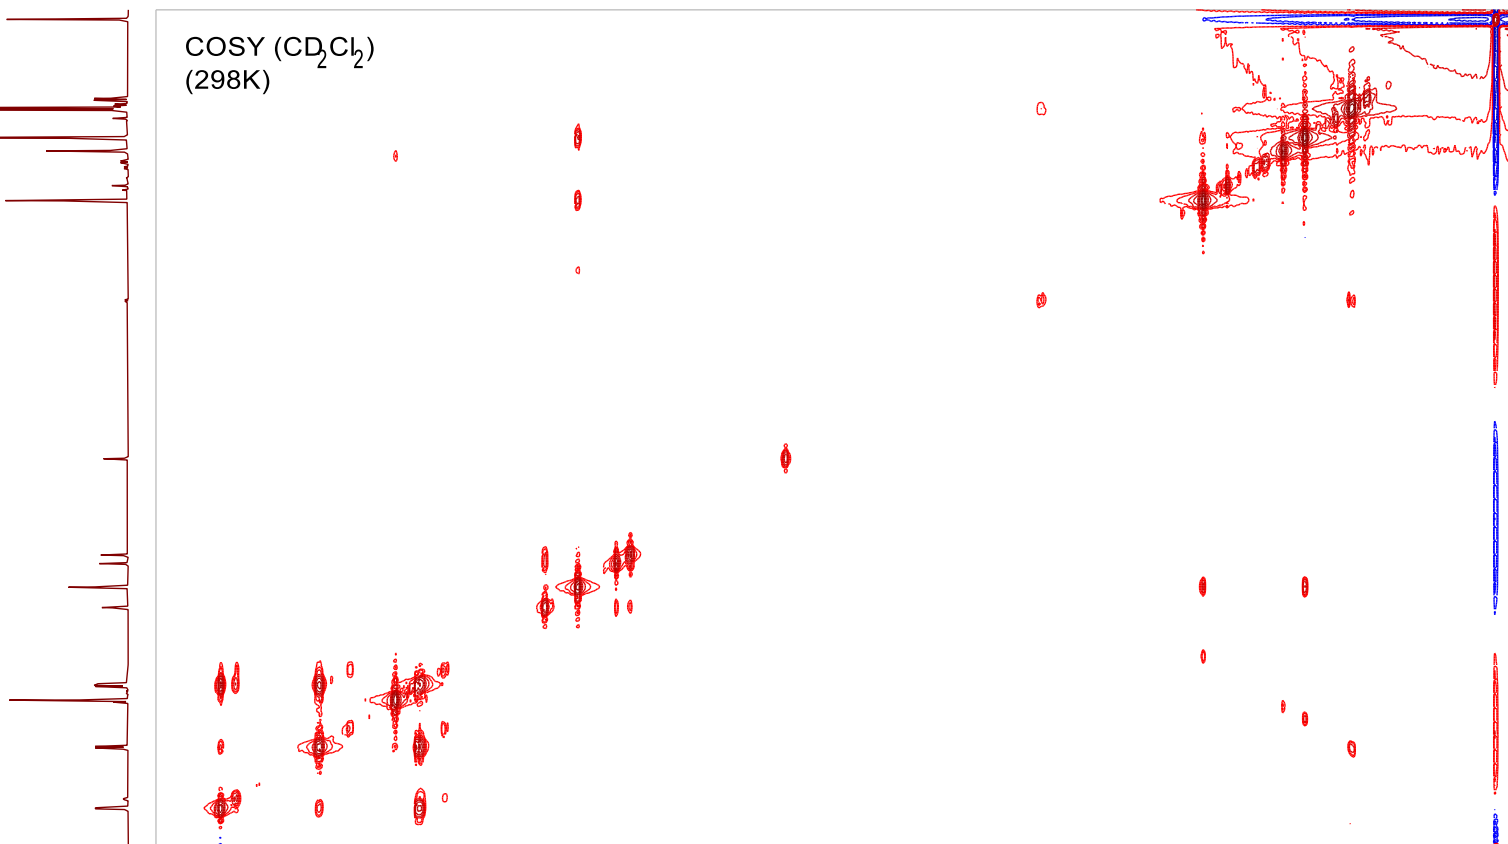

f1 (ppm)

f2 (ppm)

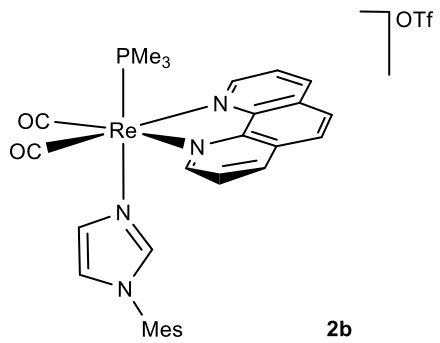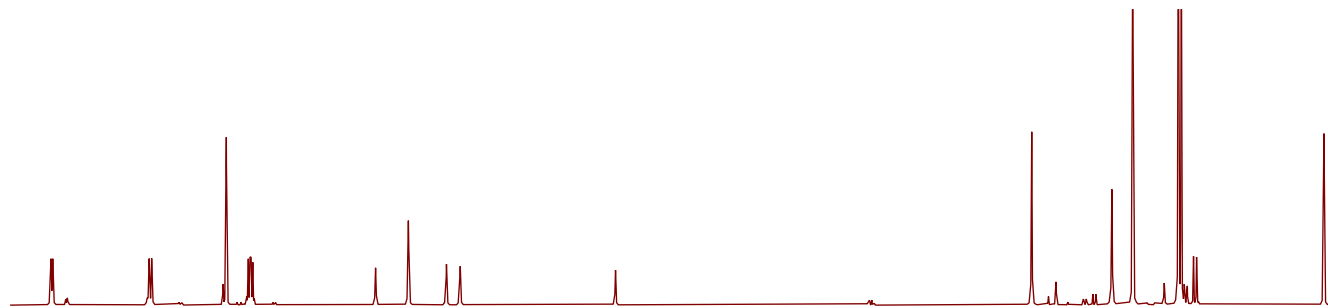

HSQC (CD<sub>2</sub>Cl<sub>2</sub>)  
(298K)

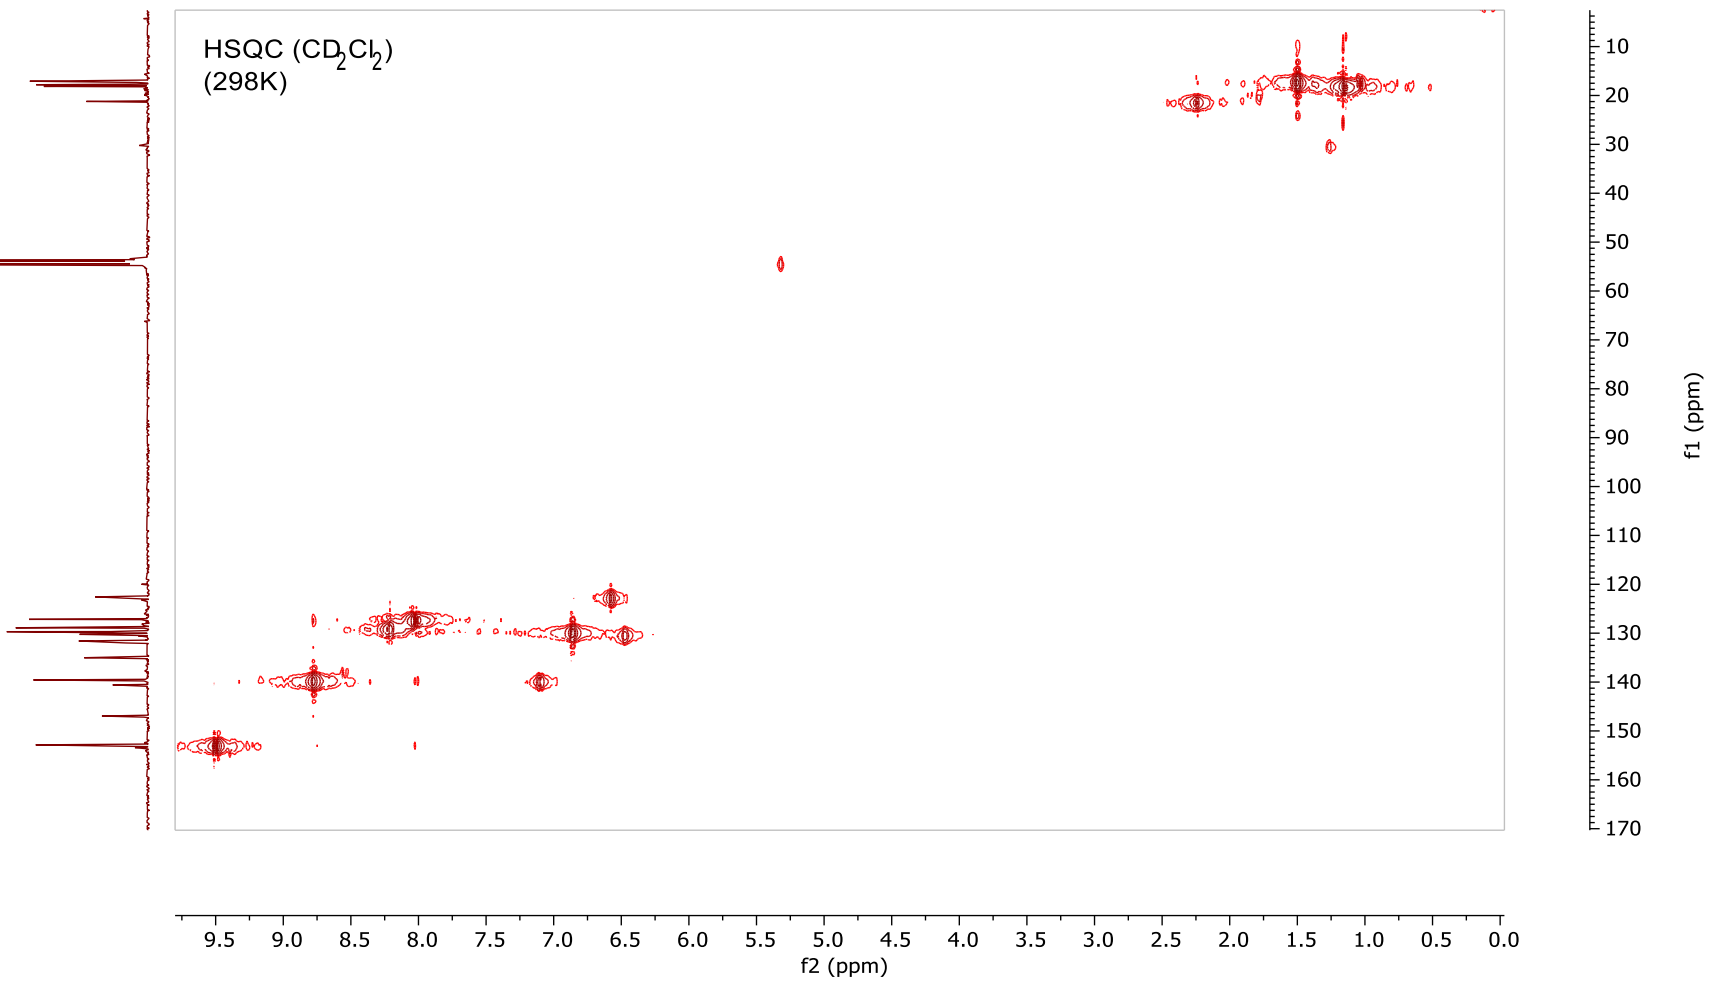



$^1\text{H}$  NMR ( $\text{CD}_2\text{Cl}_2$ )  
(298K)

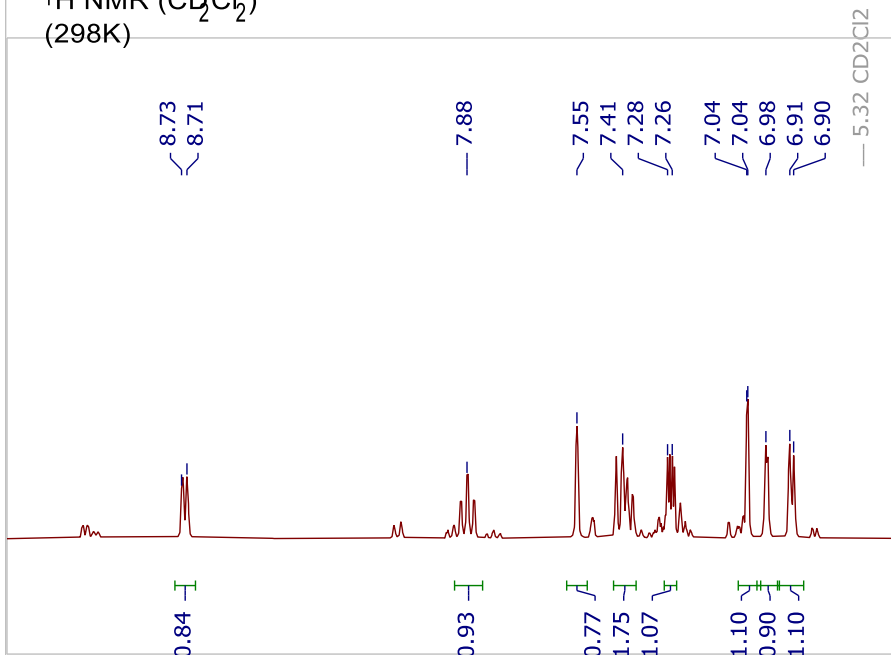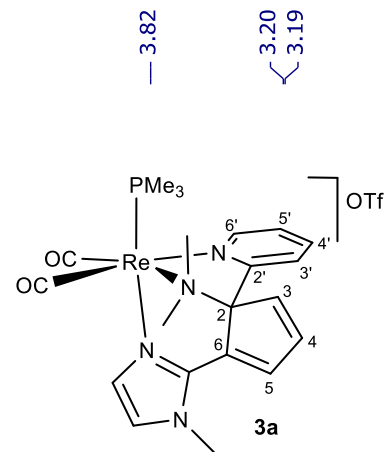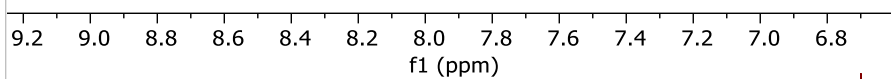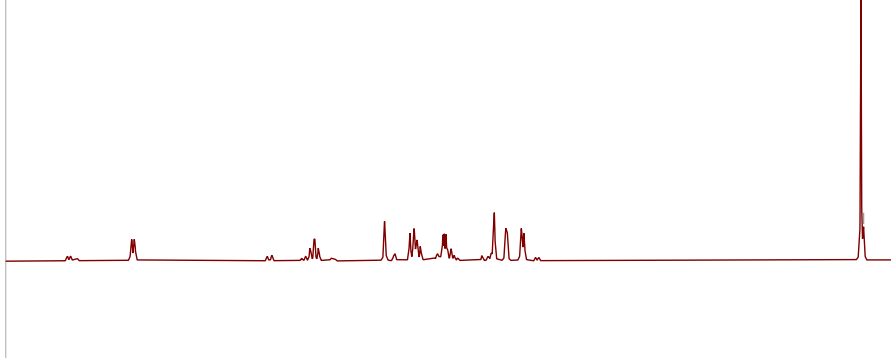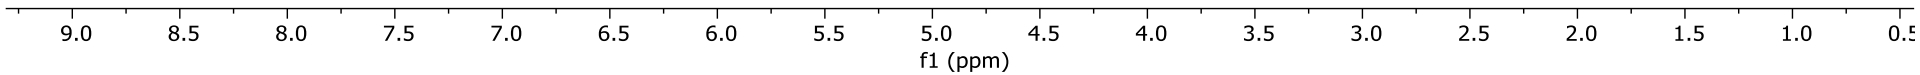

$^{13}\text{C}$  NMR ( $\text{CD}_2\text{Cl}_2$ )  
(298K)

204.6  
204.5  
202.2  
202.1

158.8  
153.5  
141.1  
140.7  
135.8  
135.5  
133.9  
133.1  
131.1  
126.5  
126.1  
124.0

88.6

56.6  
56.5  
53.8  $\text{CD}_2\text{Cl}_2$

47.6

37.8

20.7  
20.3

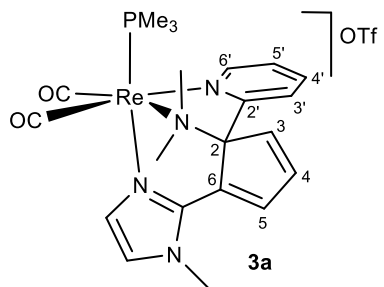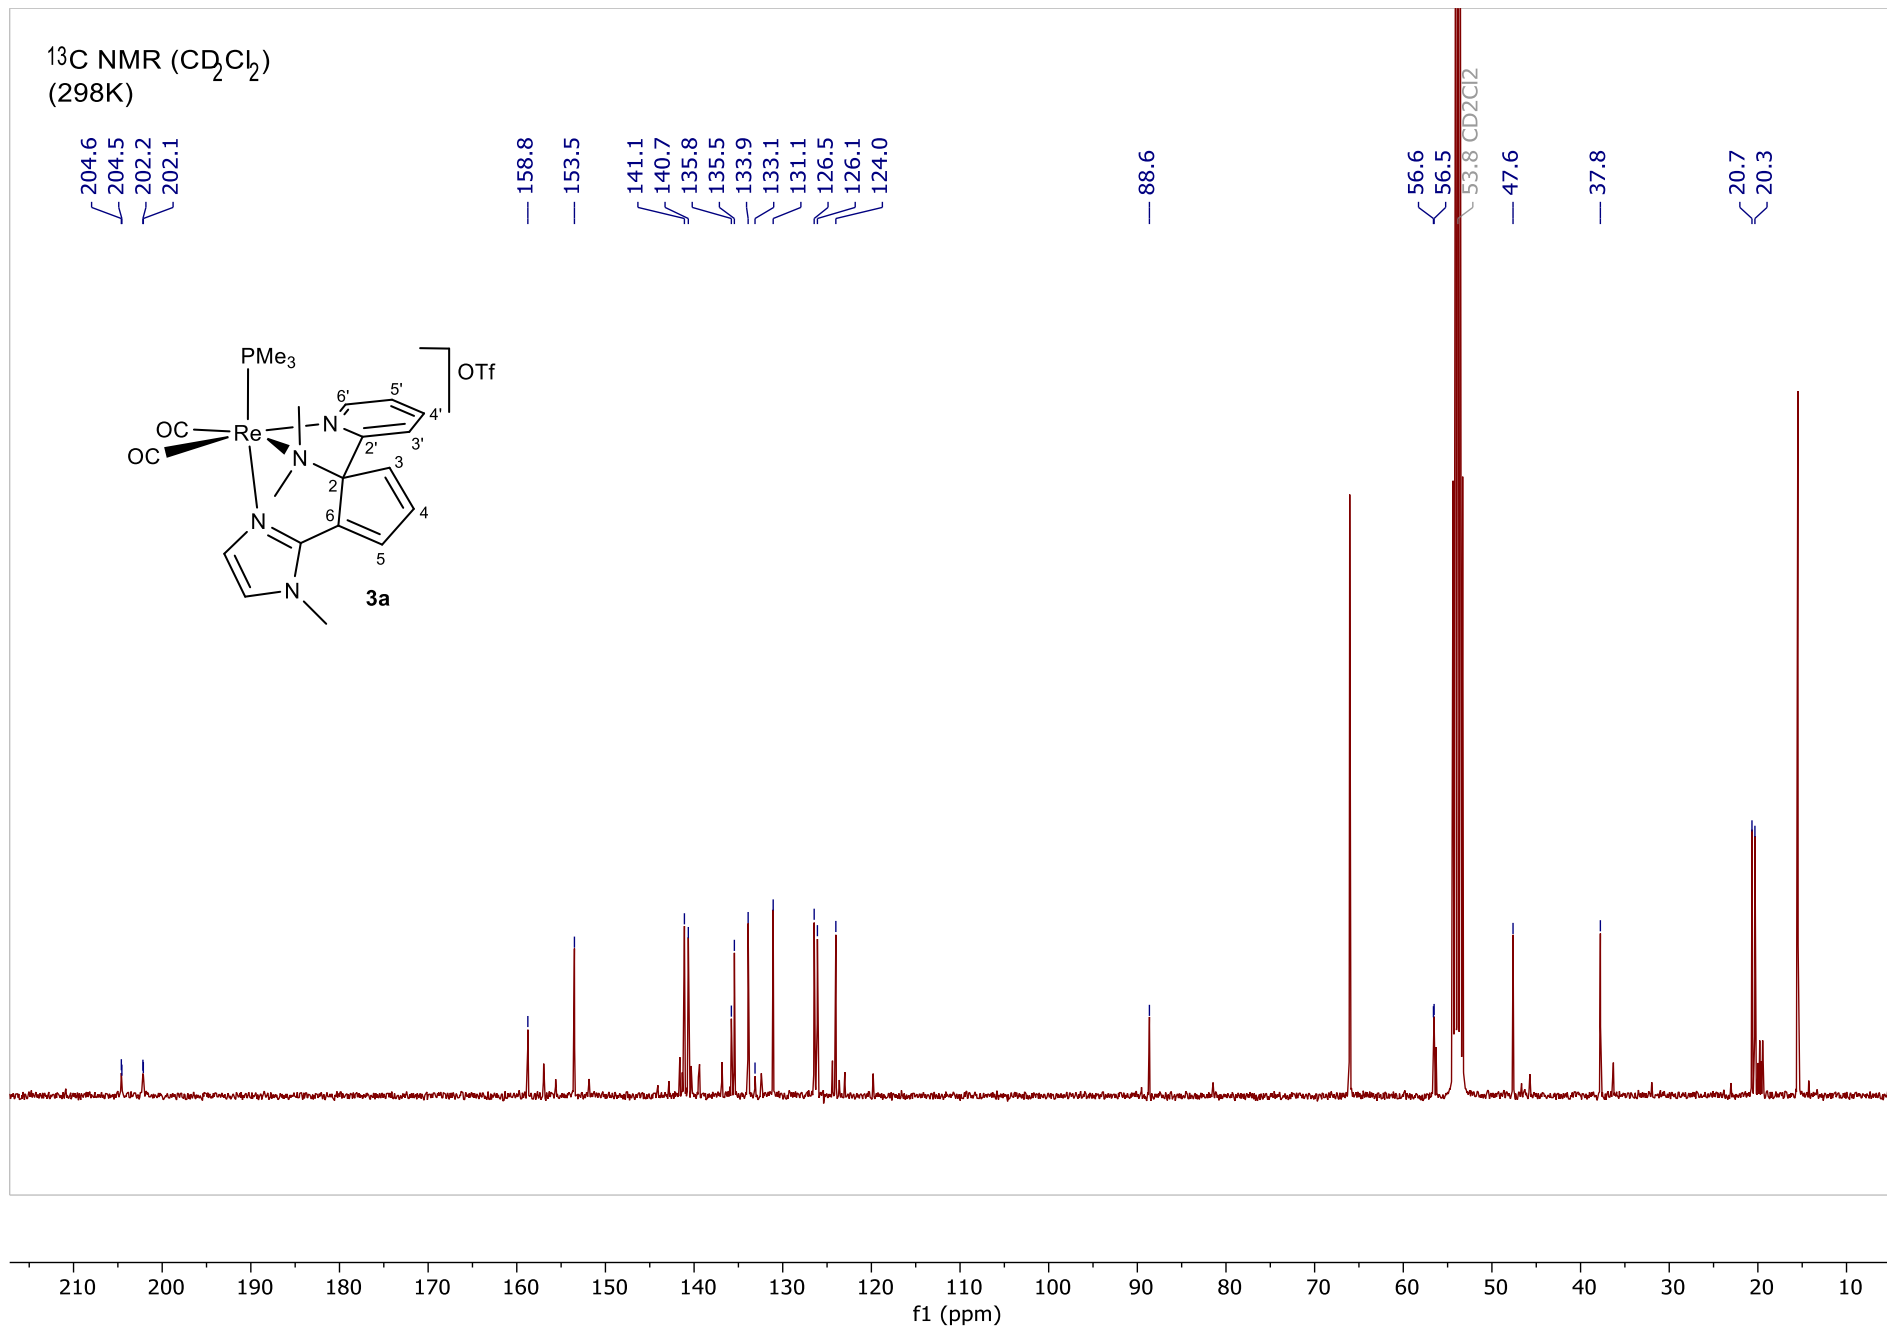

$^{13}\text{P}$  NMR ( $\text{CD}_2\text{Cl}_2$ )  
(298K)

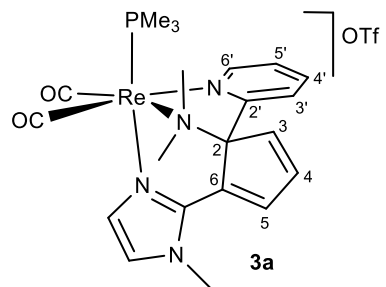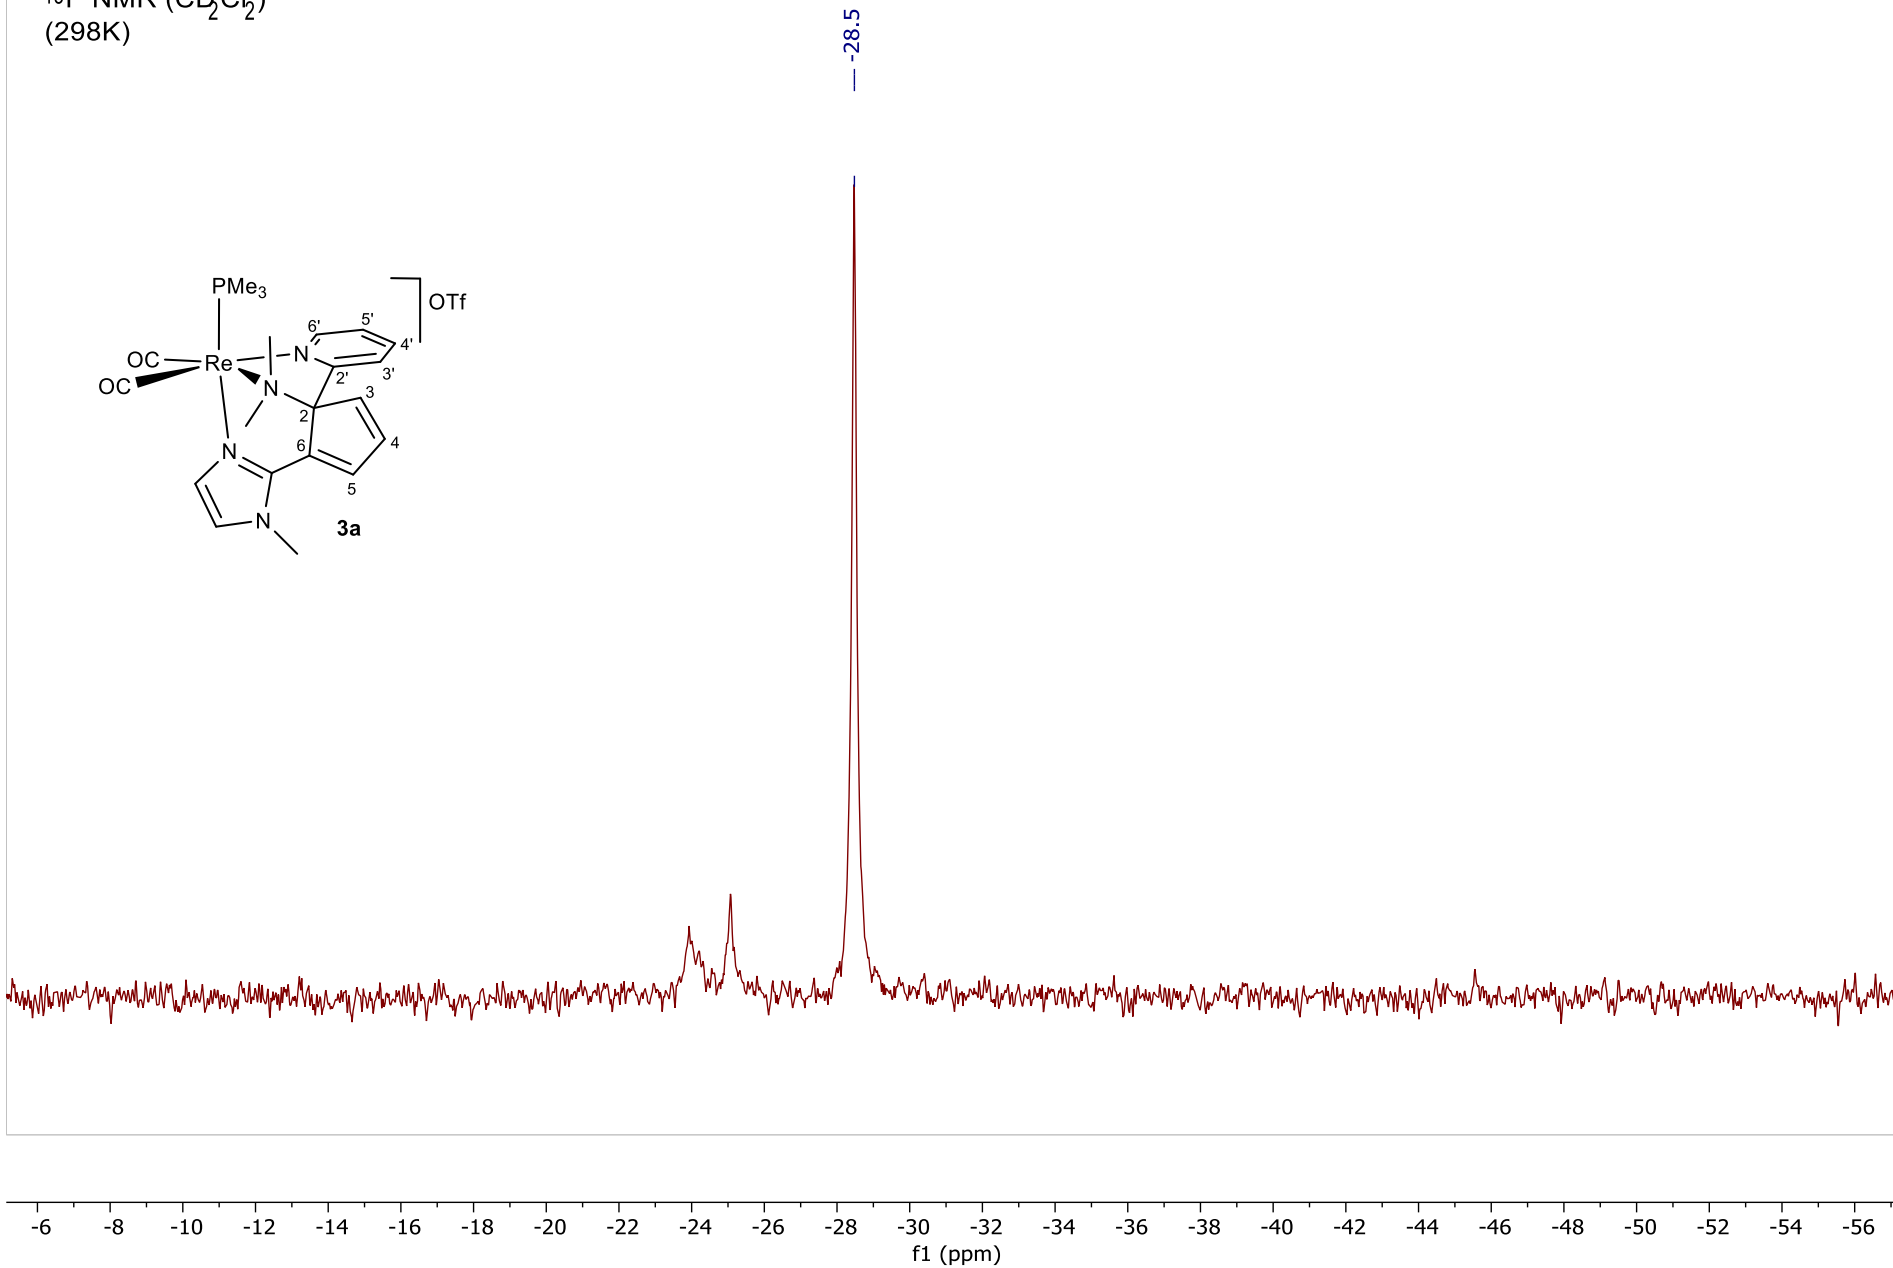

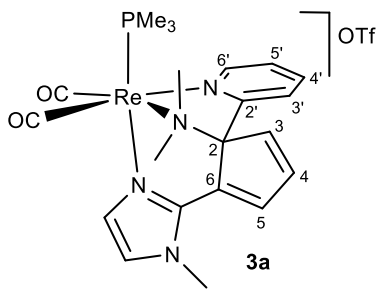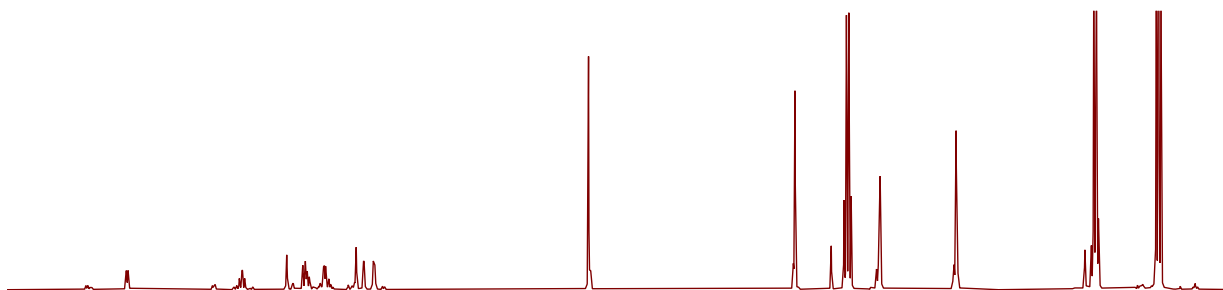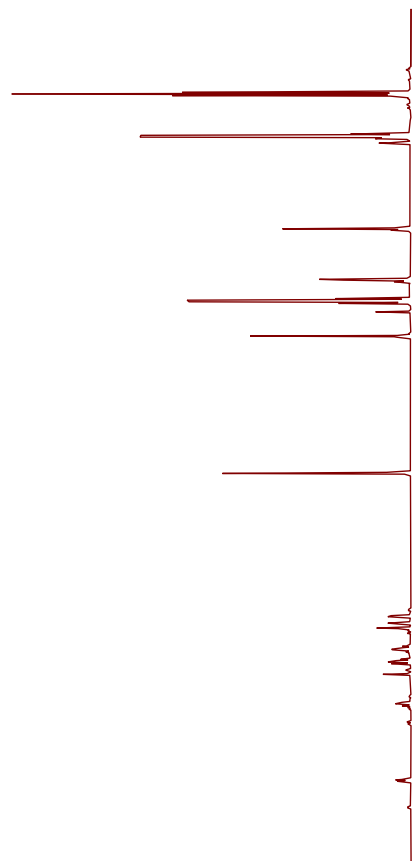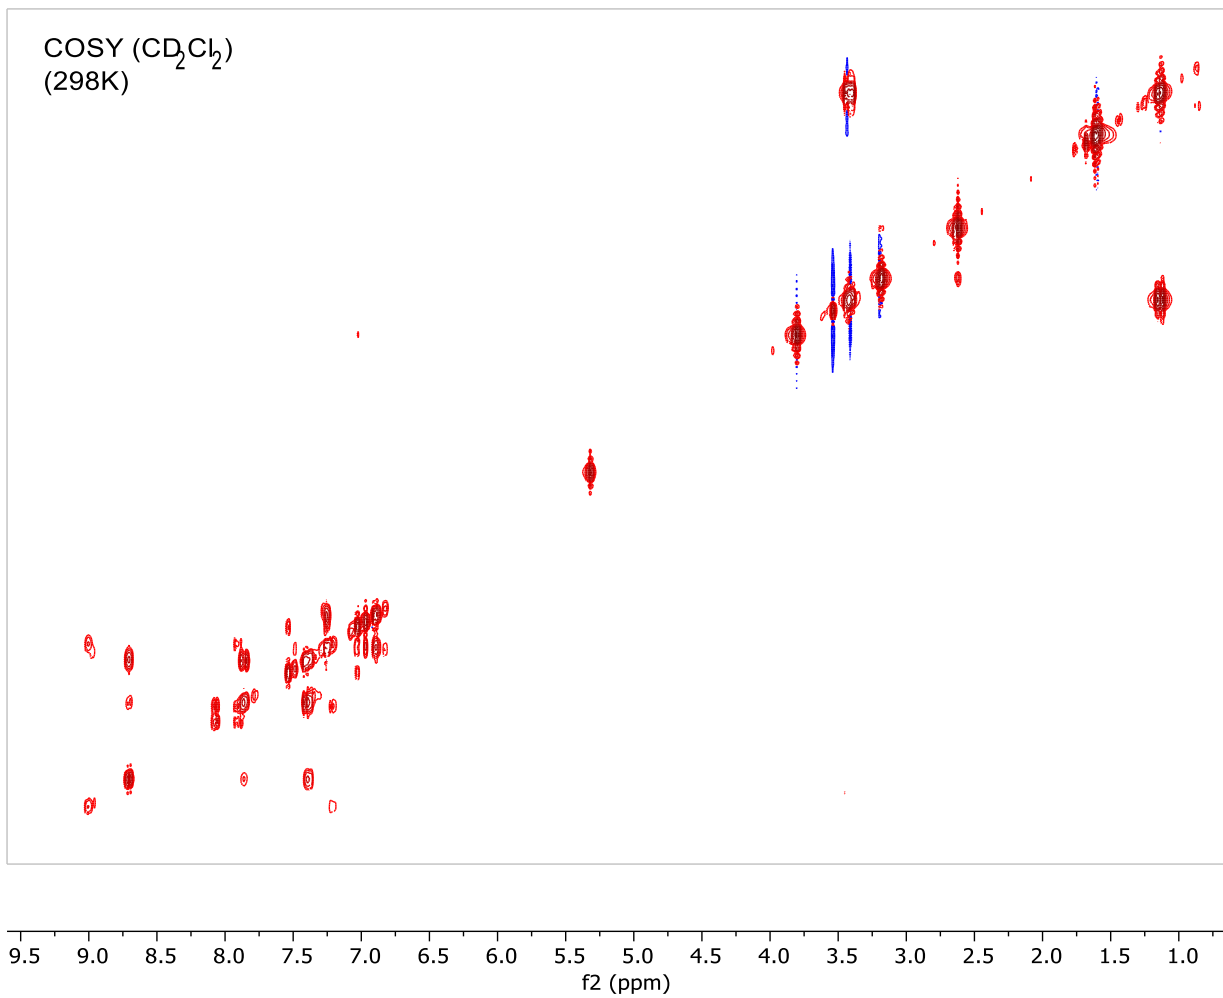

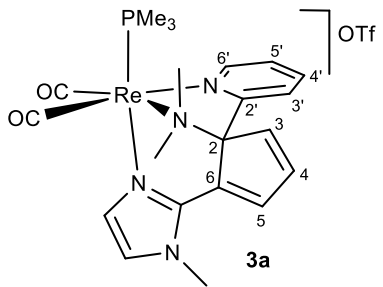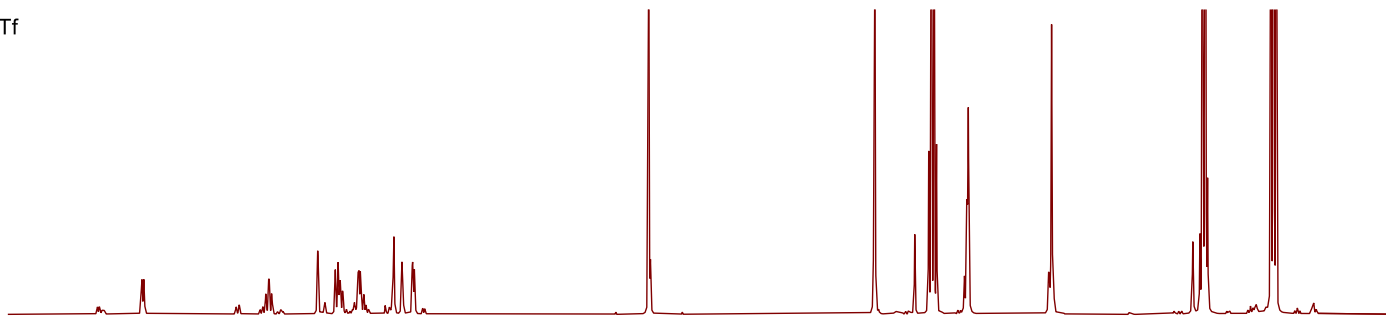

HSQC ( $\text{CD}_2\text{Cl}_2$ )  
(298K)

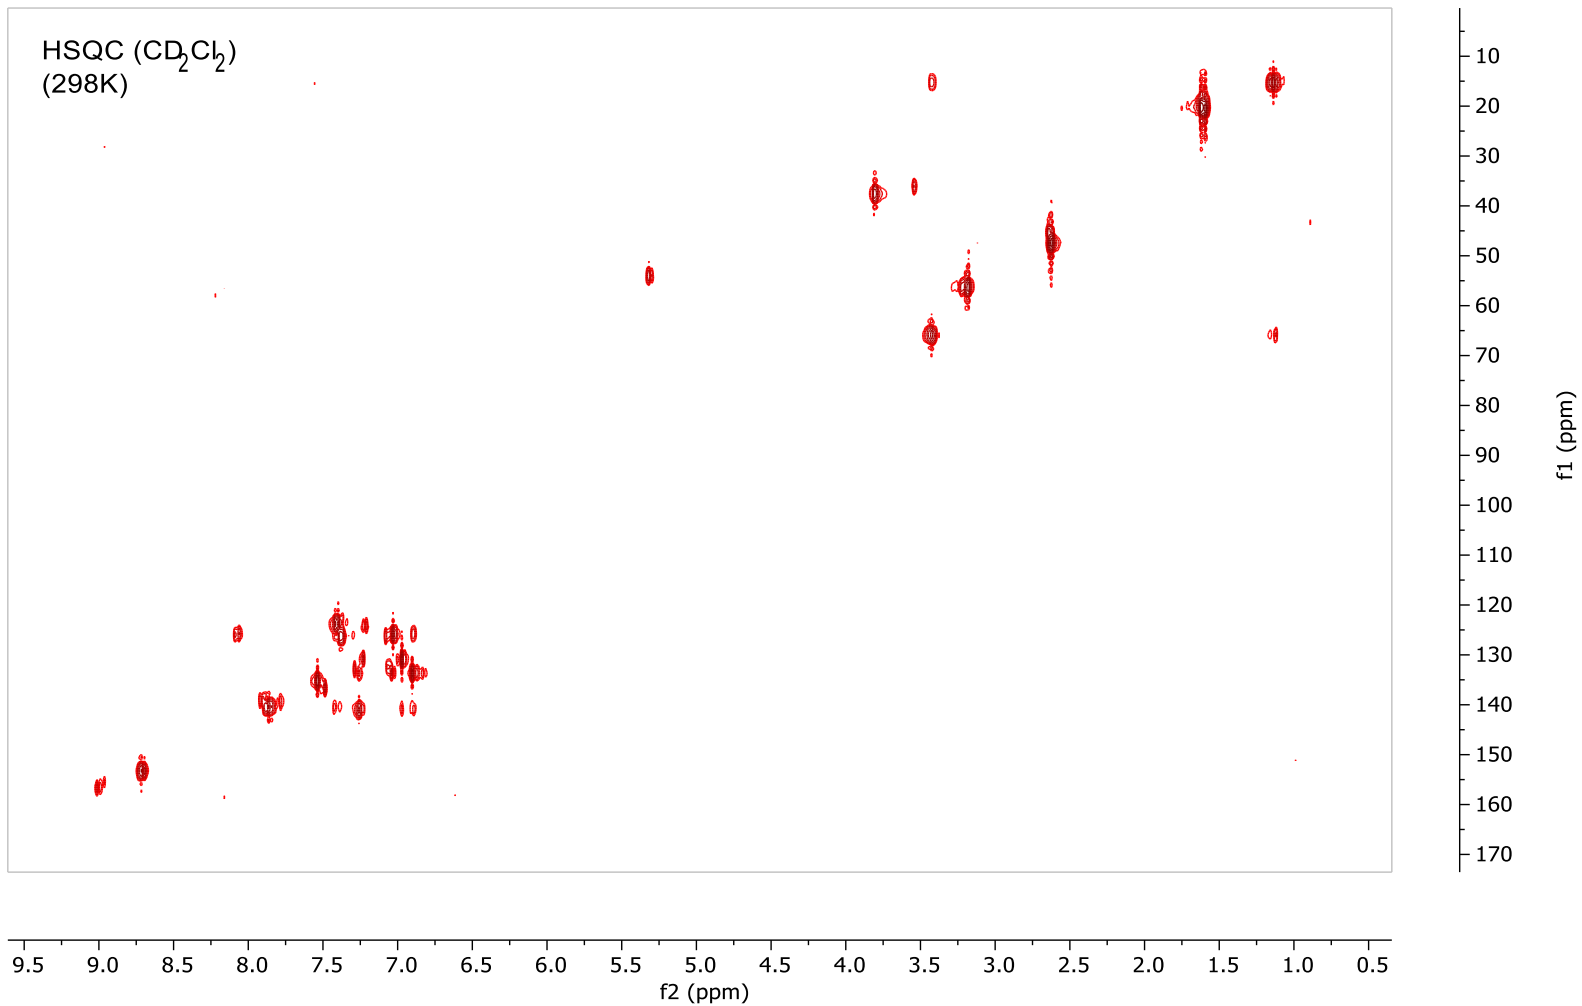

$^1\text{H}$  NMR ( $\text{CD}_2\text{Cl}_2$ )  
(298K)

8.77  
8.75  
8.74  
8.72  
7.89  
7.86  
7.85  
7.77  
7.75  
7.73  
7.71  
7.69  
7.42  
7.35  
7.33  
7.28  
7.22  
7.19  
7.08  
6.95  
6.95  
6.92  
6.90  
6.73  
6.72  
6.71  
6.09  
— 5.48  
— 5.31

3.41  
3.22  
3.21  
2.64  
2.56  
2.54  
2.35  
— 2.00  
1.64  
1.62  
1.28  
1.24  
1.14

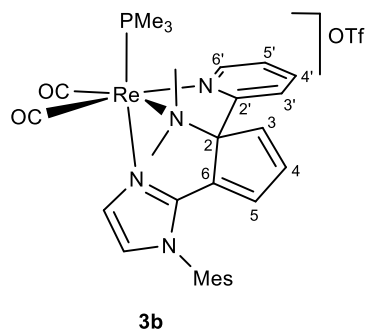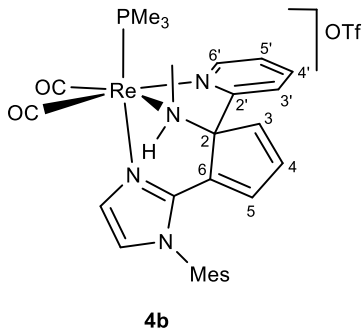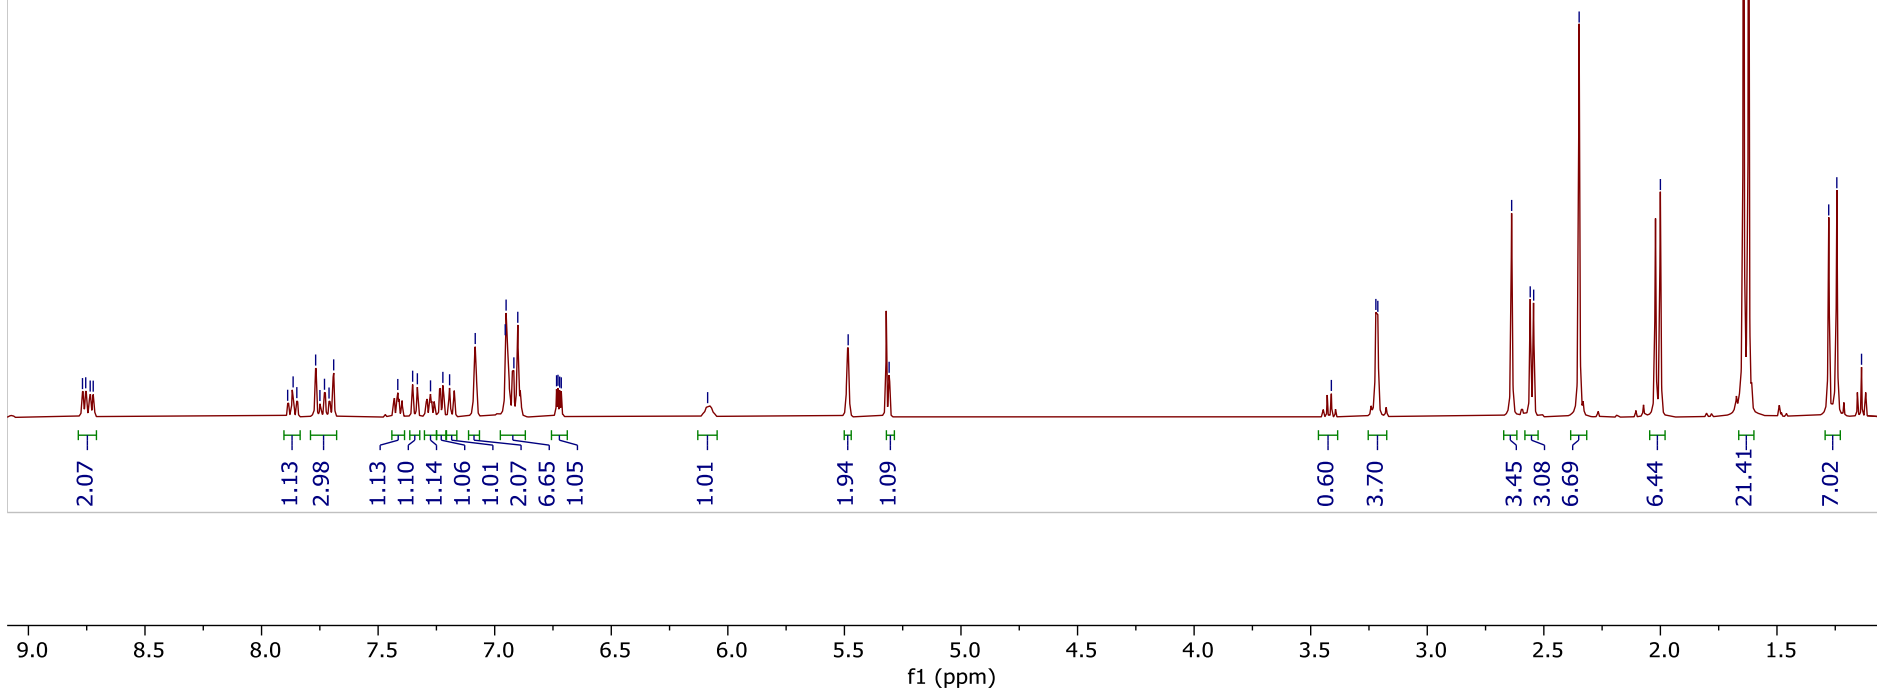

$^{13}\text{C}$  NMR ( $\text{CD}_2\text{Cl}_2$ )  
(298K)

205.1  
205.1  
204.7  
204.6  
202.8  
202.1  
202.0

159.9  
158.9  
153.5  
153.1  
141.4  
141.0  
140.7  
140.3  
139.7  
138.1  
137.1  
136.9  
135.8  
135.3  
134.9  
134.3  
134.1  
133.2  
132.9  
131.1  
130.7  
130.4  
130.3  
130.1  
126.5  
125.5  
124.3  
123.6  
123.5  
122.3  
88.5  
83.4

56.7  
56.6  
53.8  $\text{CD}_2\text{Cl}_2$   
47.7

36.2  
21.3  
20.7  
20.2  
18.9  
18.4  
17.9  
17.8  
16.6  
16.6

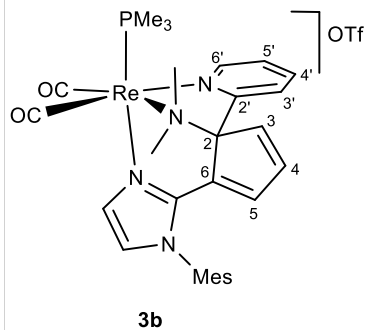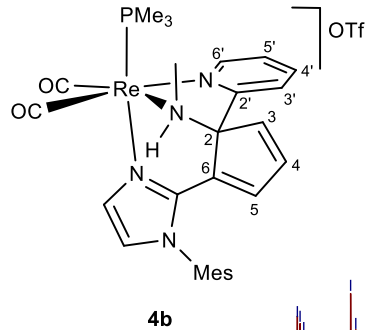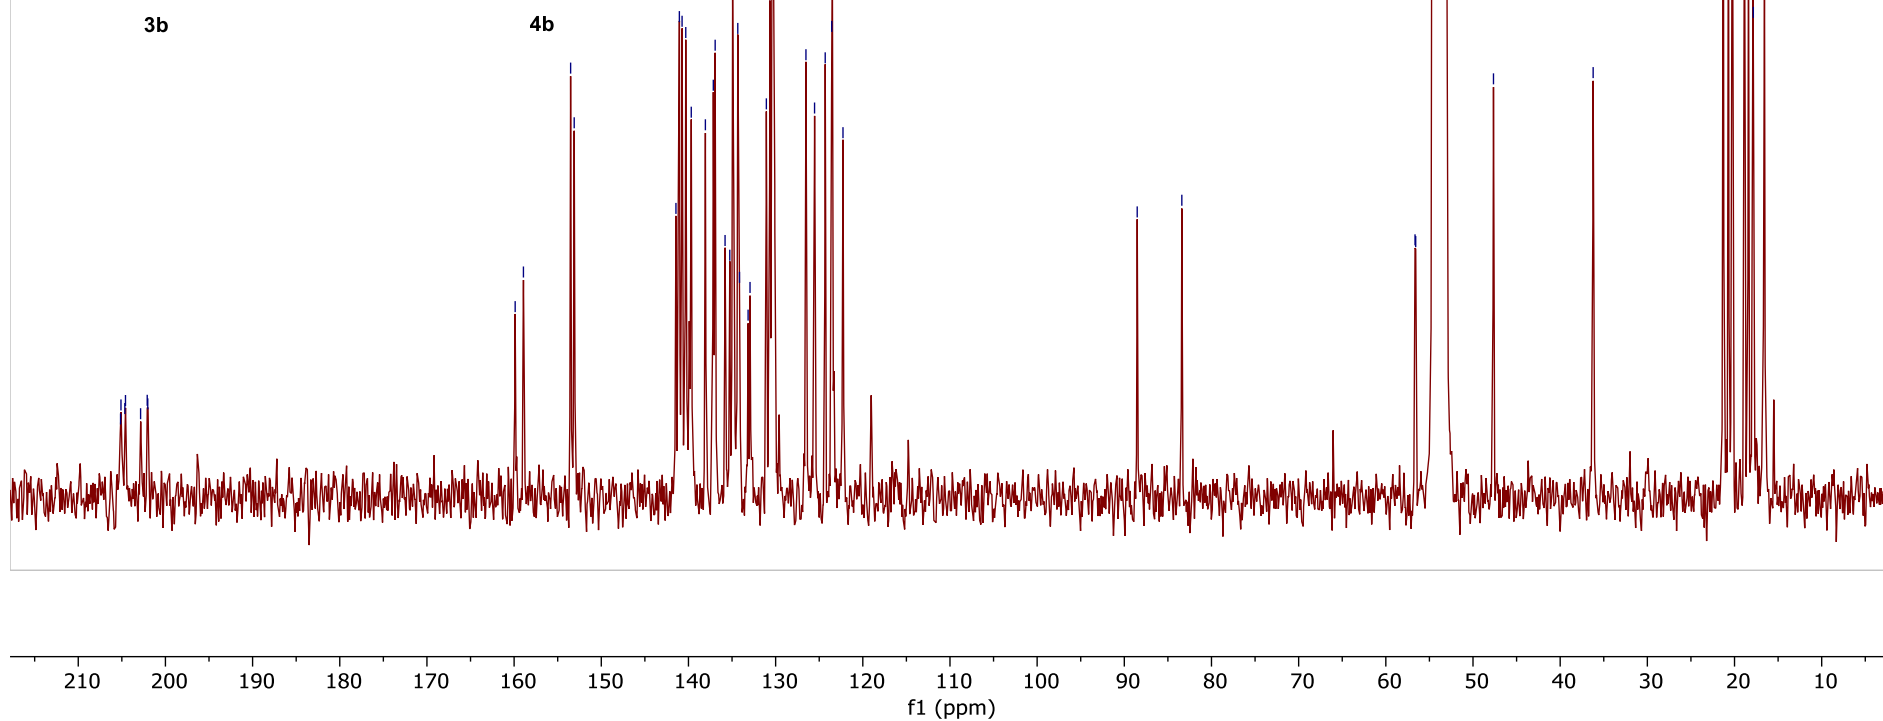

$^{31}\text{P}$  NMR ( $\text{CD}_2\text{Cl}_2$ )  
(298K)

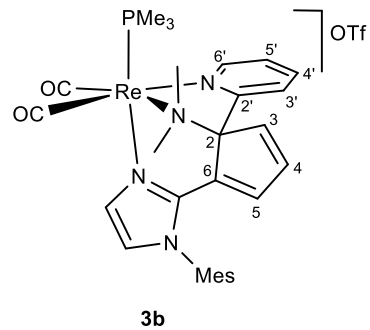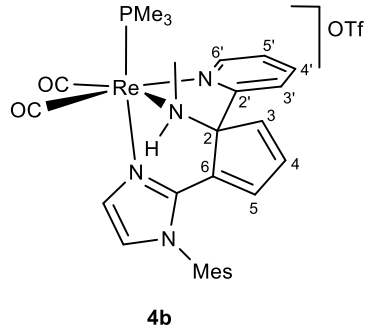

-20.8

-28.4

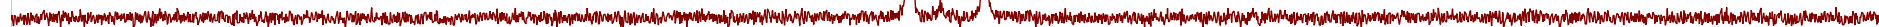

60

50

40

30

20

10

0

-10

-20

f1 (ppm)

-40

-50

-60

-70

-80

-90

-100

-110



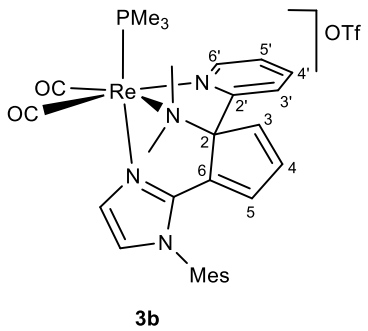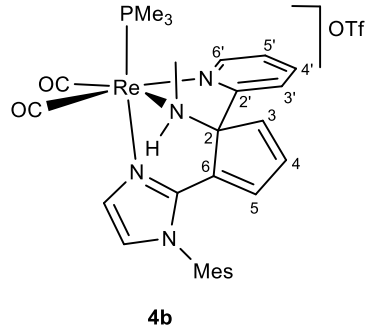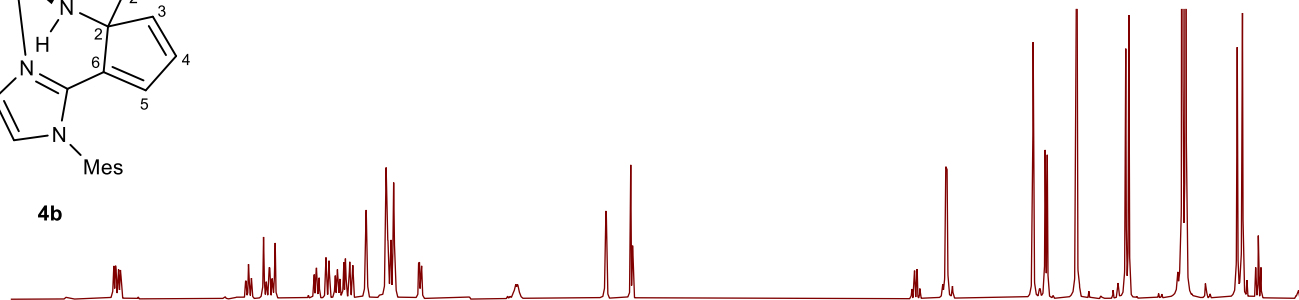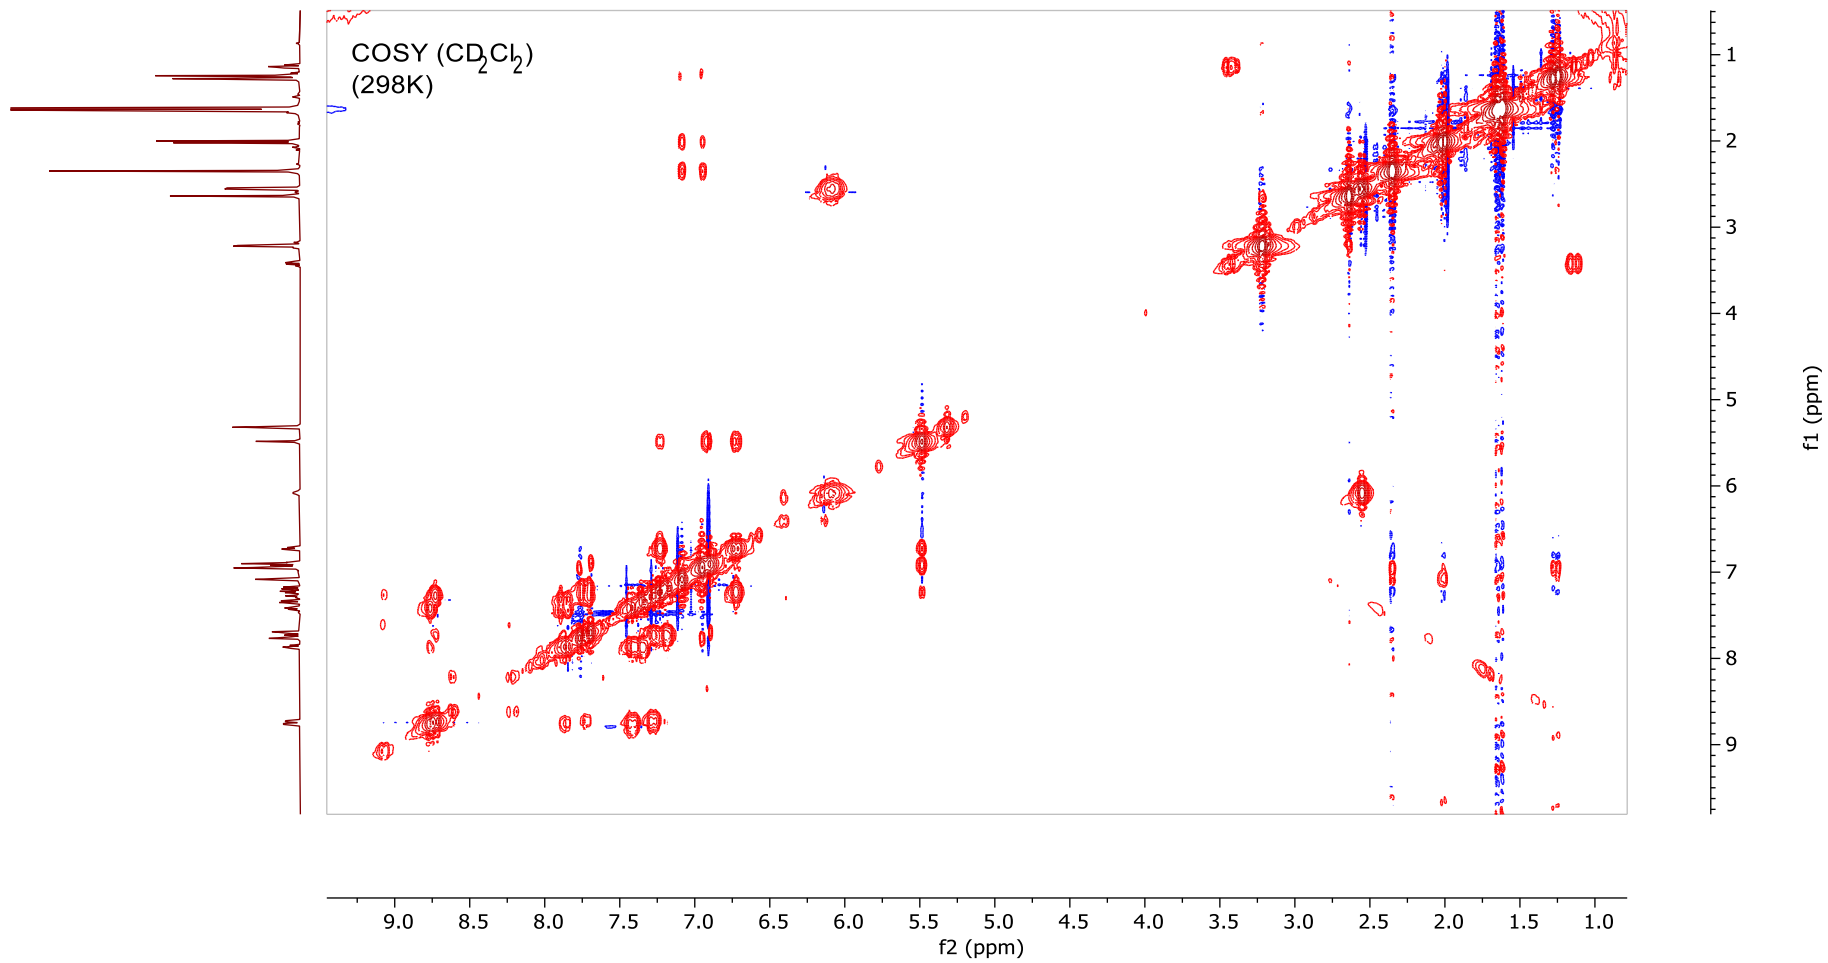

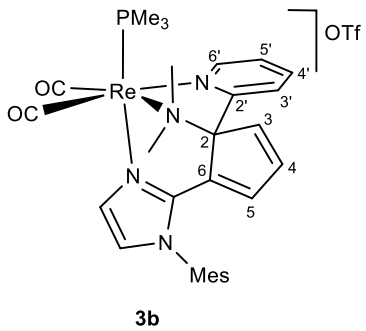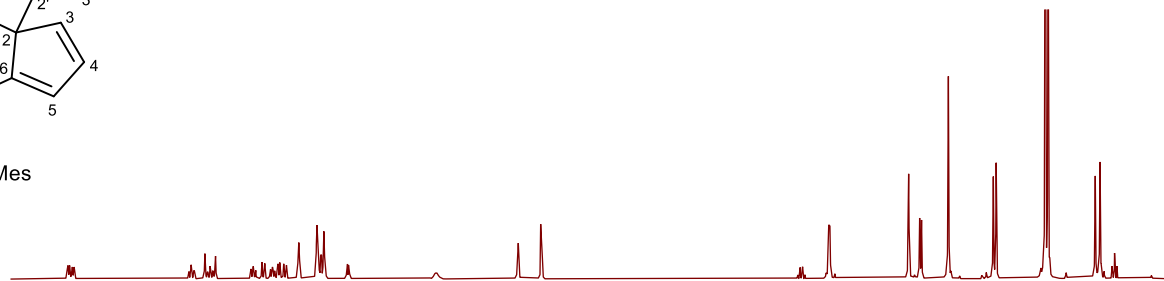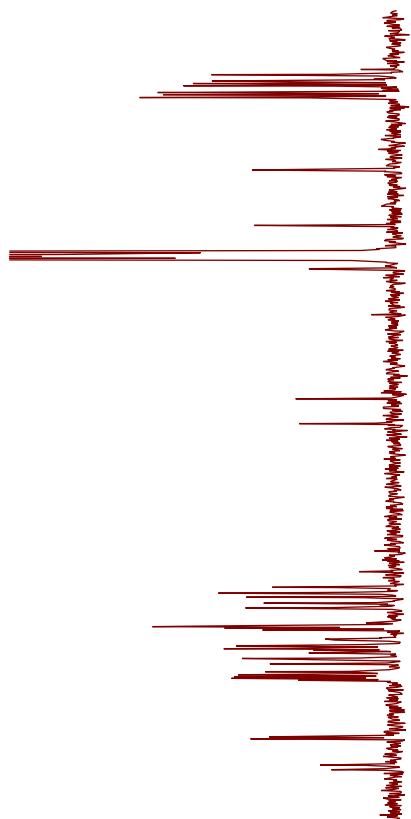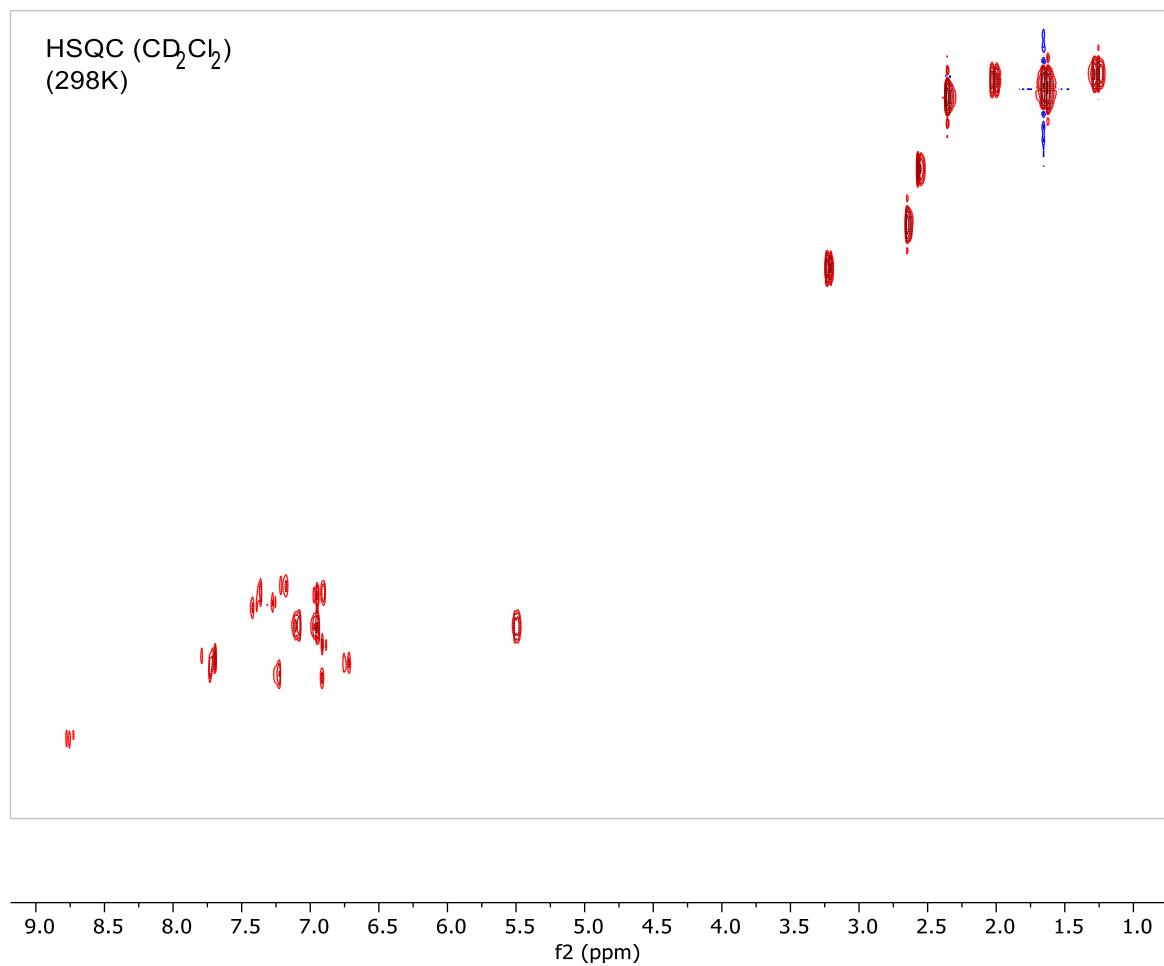

$^1\text{H NMR (CD}_2\text{Cl}_2)$   
(298K)

9.43  
9.42  
9.41  
9.41  
8.50  
8.50  
8.48  
8.48  
8.14  
8.12  
7.83  
7.81  
7.69  
7.68  
7.47  
7.46  
7.45  
7.44  
7.34  
7.20  
7.18  
6.84  
6.84

— 5.32 CD<sub>2</sub>Cl<sub>2</sub>

— 3.53

— 3.29

< 2.56

< 2.55

< 1.52

< 1.50

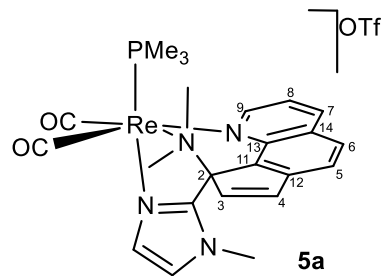

1.01

1.00

1.03

0.95

0.99

1.01

0.91

1.06

0.96

3.22

3.19

3.24

9.65

10.0 9.5 9.0 8.5 8.0 7.5 7.0 6.5 6.0 5.5 5.0 4.5 4.0 3.5 3.0 2.5 2.0 1.5 1.0 0.0

f1 (ppm)

$^{13}\text{C}$  NMR ( $\text{CD}_2\text{Cl}_2$ )  
(298K)



159.0  
144.5  
142.0  
141.3  
141.2  
134.2  
132.7  
132.6  
131.3  
130.1  
126.0  
124.2  
122.2  
115.8  
115.4

81.2

55.4

53.8  $\text{CD}_2\text{Cl}_2$

45.7  
45.7

36.8

19.7  
19.4

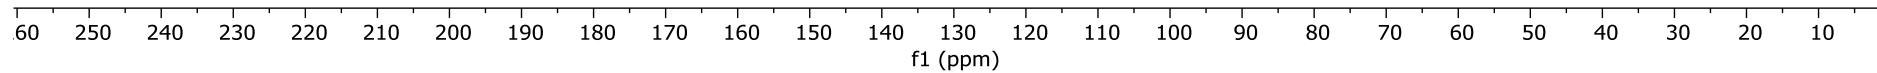

$^{31}\text{P}$  NMR ( $\text{CD}_2\text{Cl}_2$ )  
(298K)

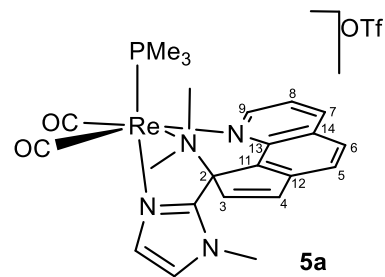

-23.4

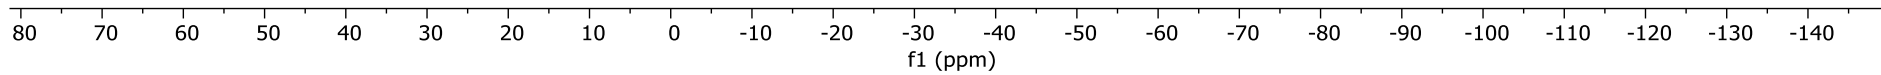

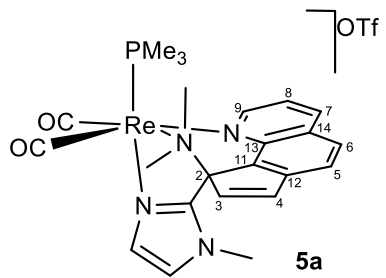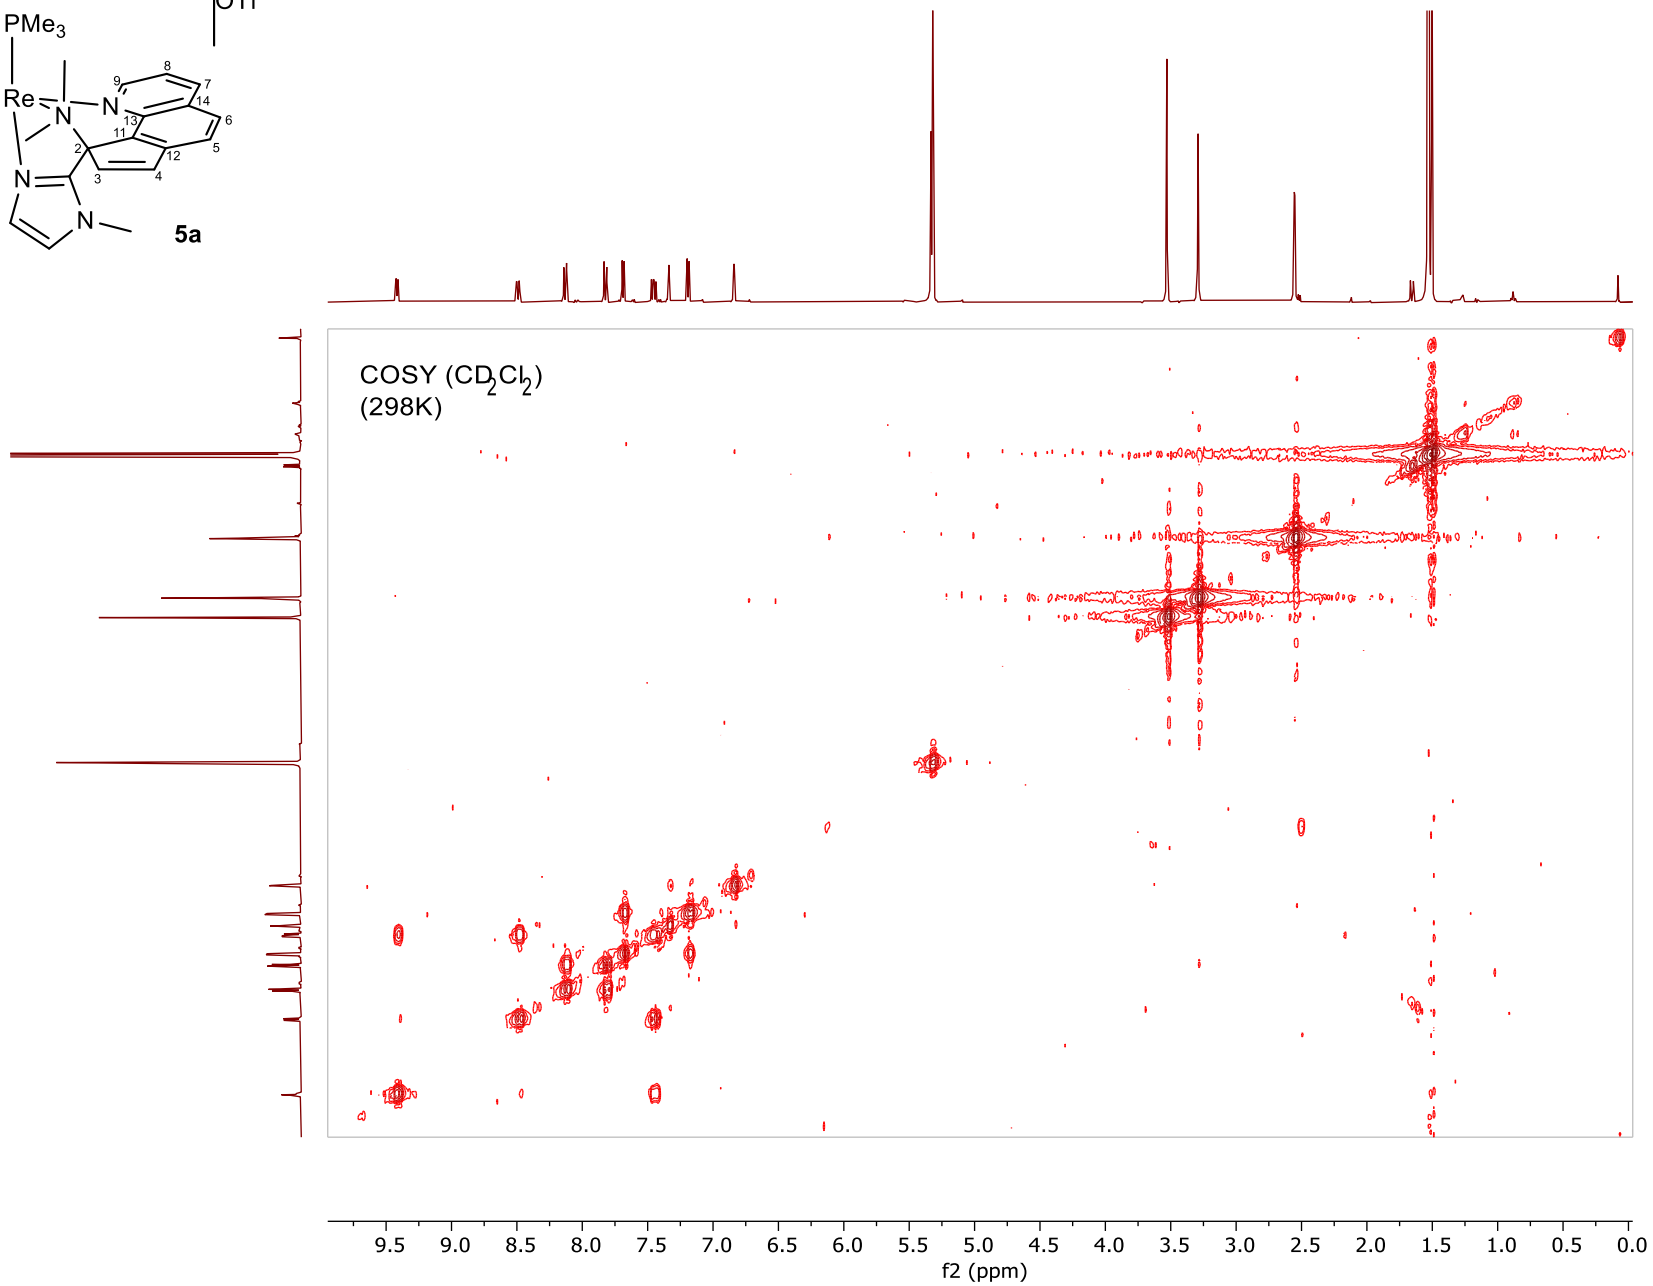

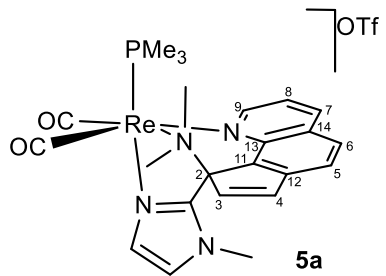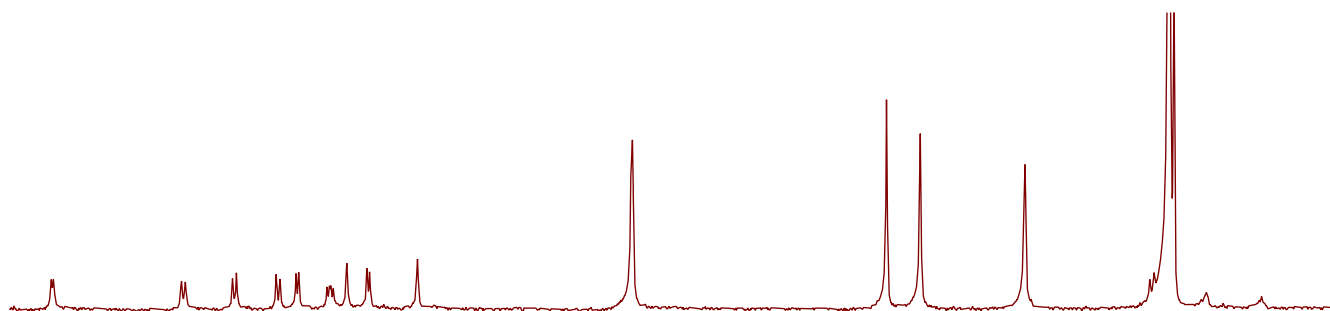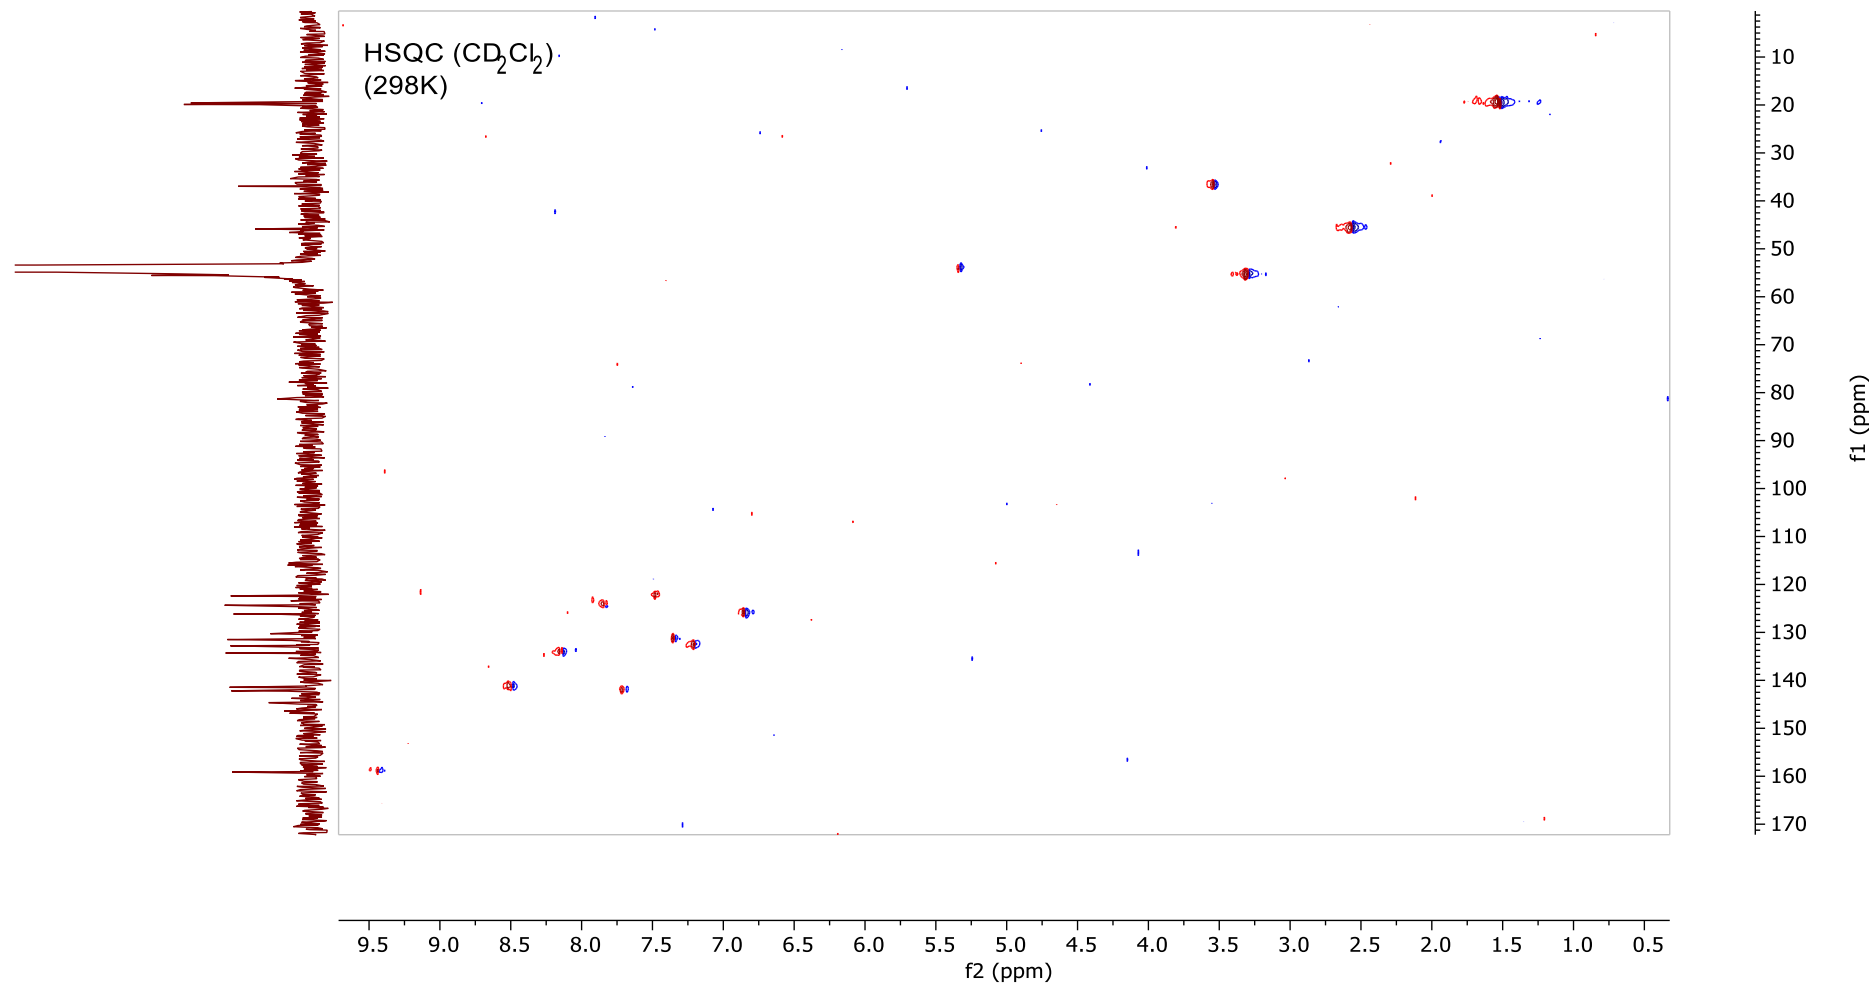

$^1\text{H}$  NMR ( $\text{CD}_2\text{Cl}_2$ )  
(298K)

9.69  
9.67

8.36  
8.33  
8.05  
8.02  
7.72  
7.69  
7.60  
7.58  
7.41  
7.39  
7.35  
7.33  
7.32  
7.30  
7.07  
7.07  
6.72  
6.71

6.12  
6.10

5.32  $\text{CD}_2\text{Cl}_2$

3.51

2.51  
2.50

1.66  
1.63

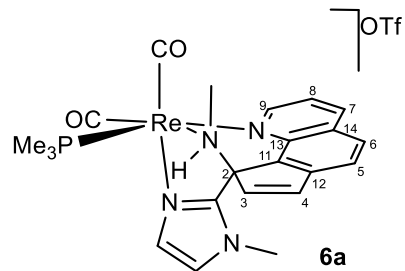

1.00

0.99

1.03

1.02

1.03

1.02

1.04

0.95

0.96

1.02

3.34

3.36

10.40

10.0 9.5 9.0 8.5 8.0 7.5 7.0 6.5 6.0 5.5 5.0 4.5 4.0 3.5 3.0 2.5 2.0 1.5 1.0 0.5  
f1 (ppm)



$^{13}\text{C}$  NMR ( $\text{CD}_2\text{Cl}_2$ )  
(298K)

205.9  
205.8  
202.8  
202.7

161.1  
149.3  
145.2  
142.1  
139.3  
139.2  
138.6  
133.8  
133.4  
132.3  
131.4  
129.6  
129.2  
125.0  
123.2  
122.0

75.0

53.6-CD<sub>2</sub>Cl<sub>2</sub>

36.4  
35.2  
32.0

23.0  
18.8  
18.3  
14.3

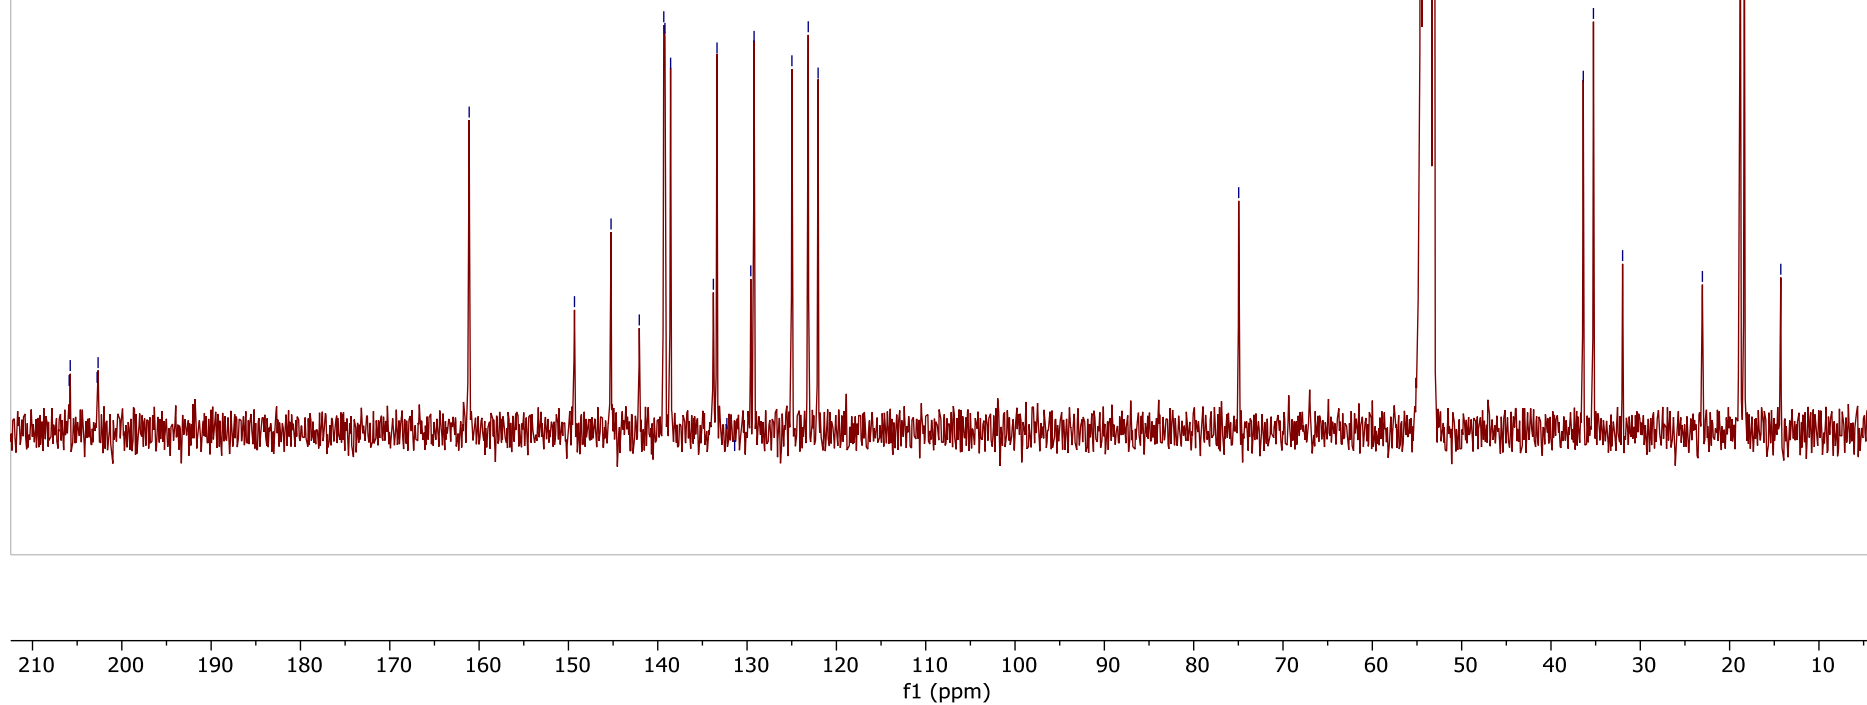

$^{31}\text{P}$  NMR ( $\text{CD}_2\text{Cl}_2$ )  
(298K)

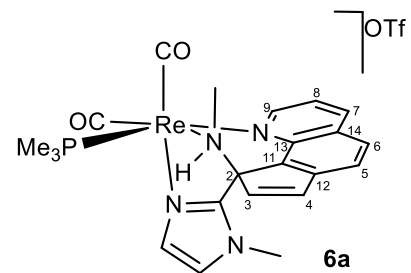

— -18.1

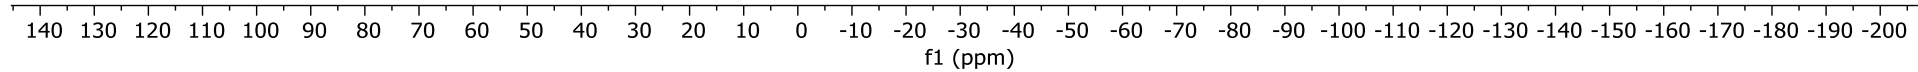

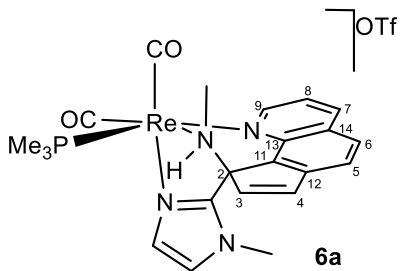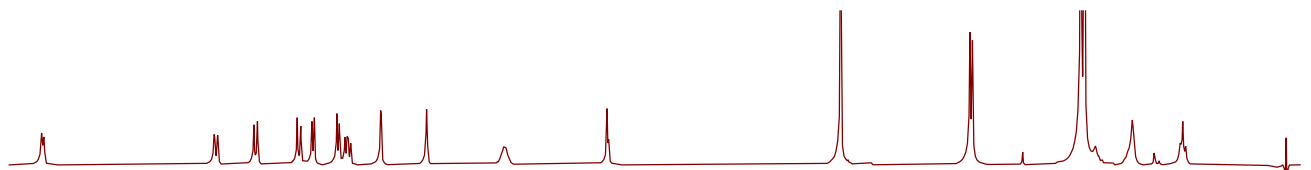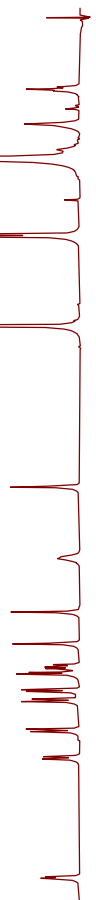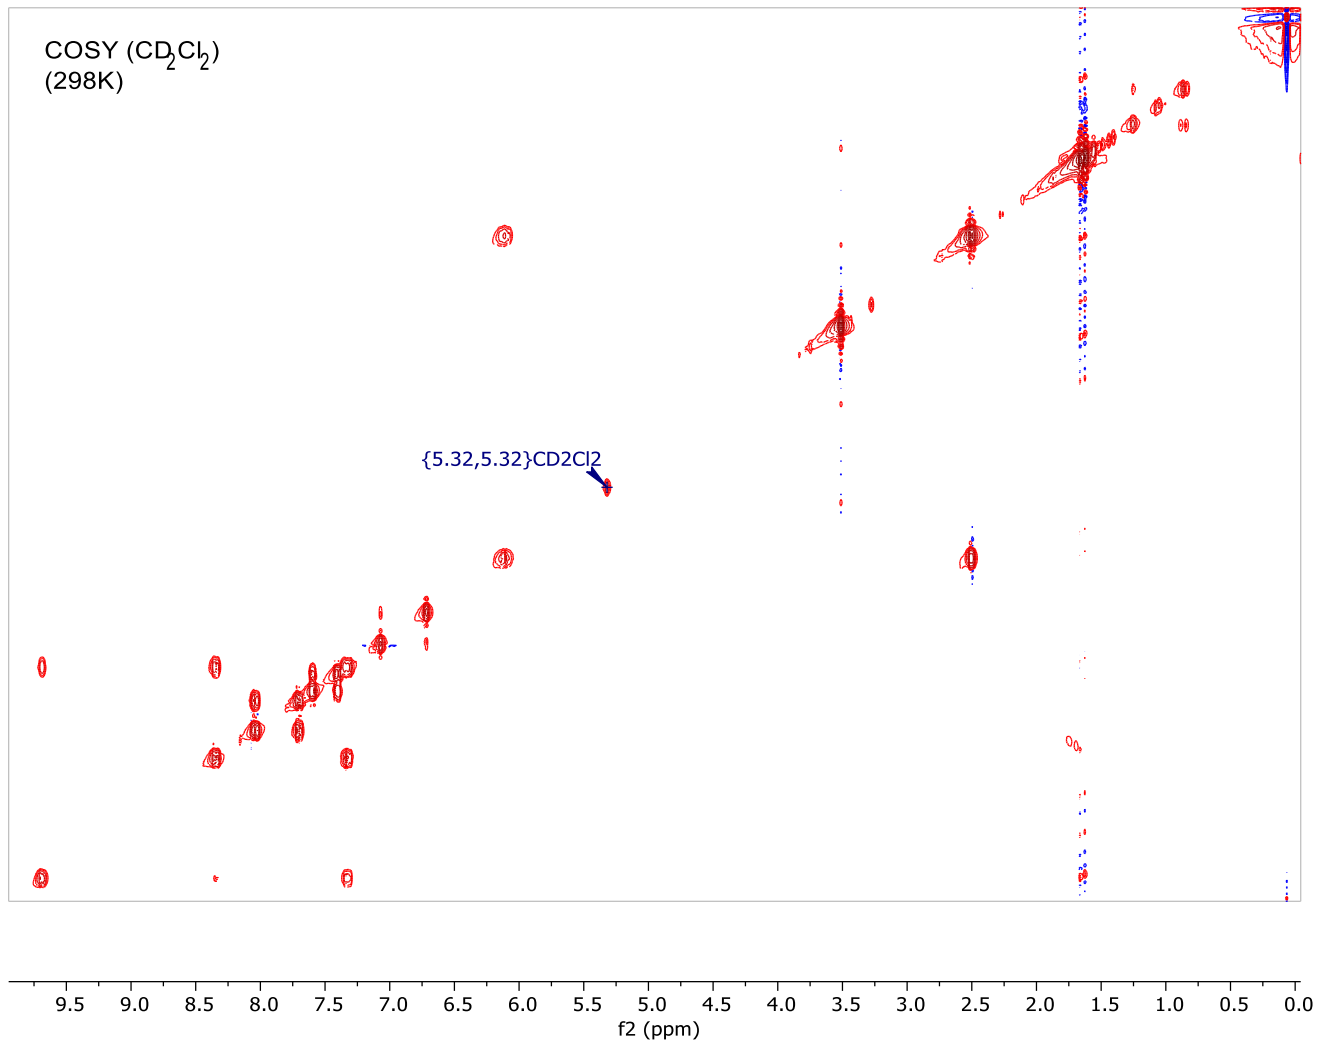

f1 (ppm)

f2 (ppm)

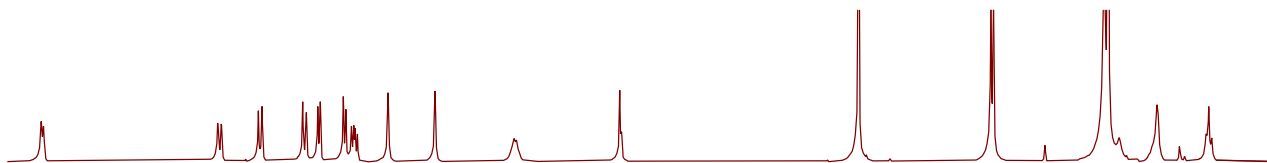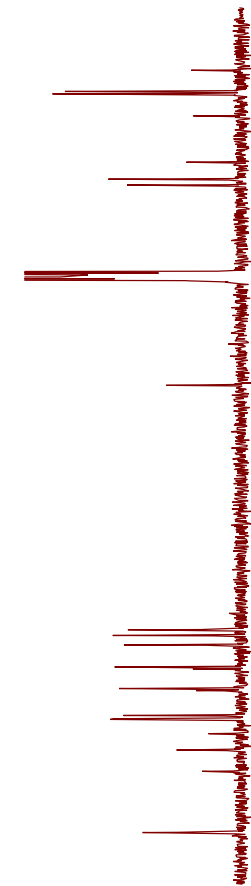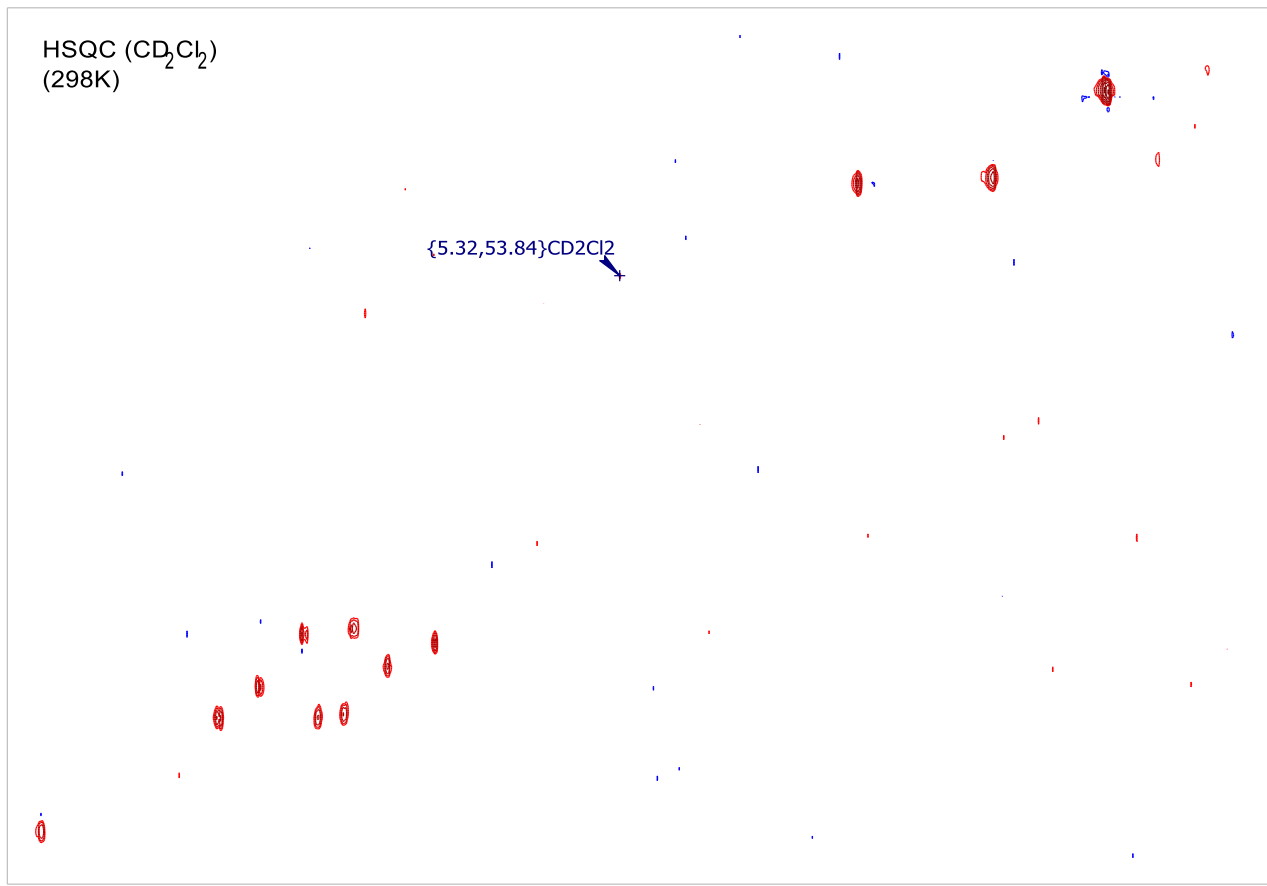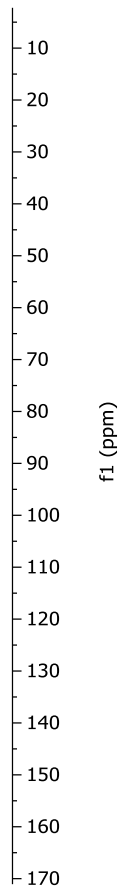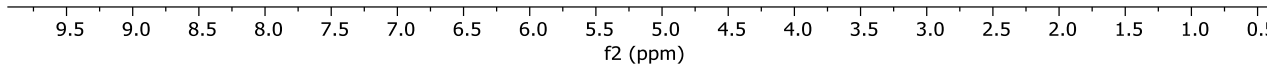

$^1\text{H NMR}$  ( $\text{CD}_2\text{Cl}_2$ )  
(298K)

— 5.32  $\text{CD}_2\text{Cl}_2$

9.42  
9.41

8.55  
8.53

8.17  
8.15

7.86  
7.84

7.74  
7.72

7.49  
7.48

7.47  
7.46

7.36  
7.34

7.32  
6.89

— 3.58

— 3.31

2.56  
2.55

1.52  
1.50

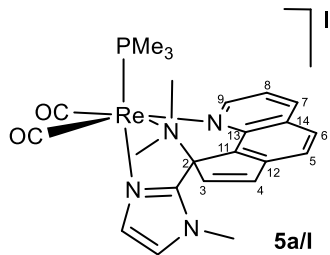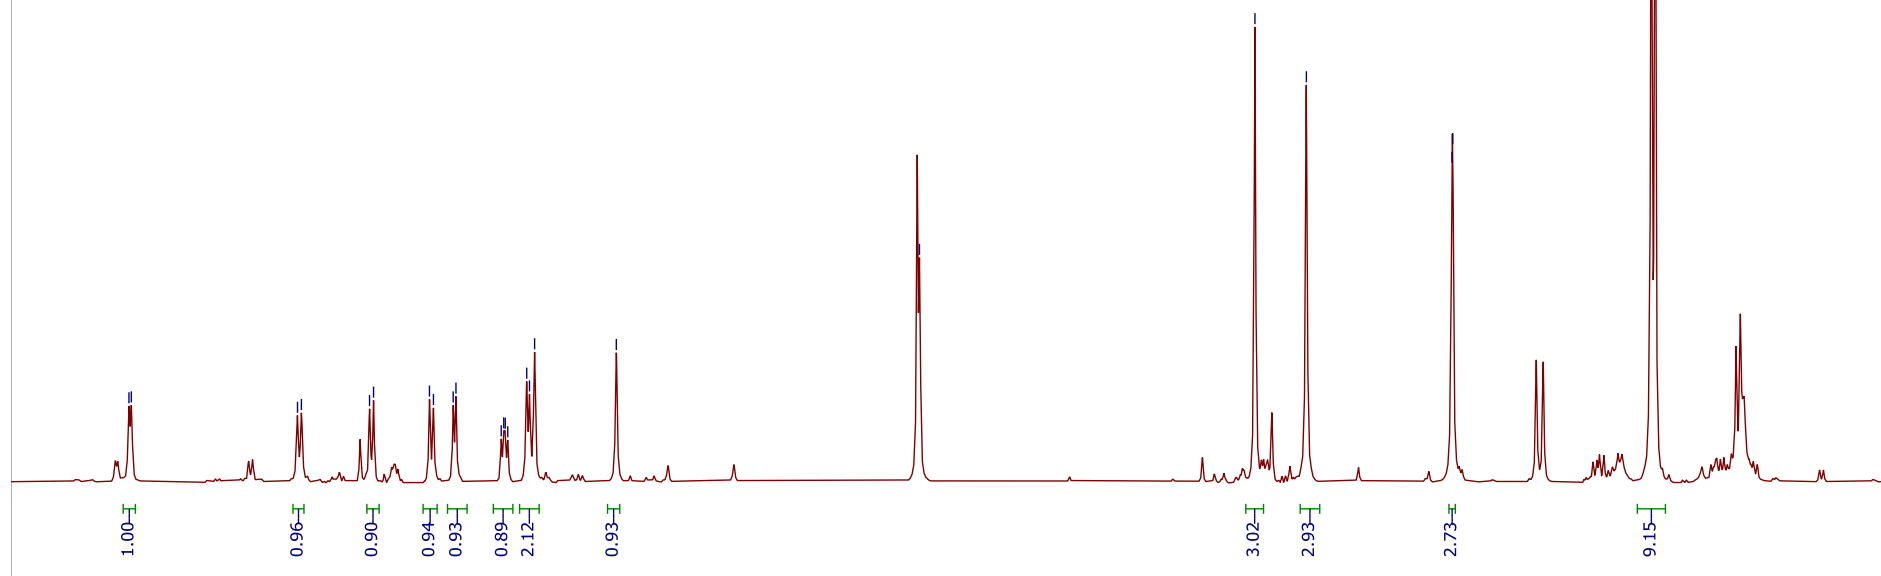

0.0 9.5 9.0 8.5 8.0 7.5 7.0 6.5 6.0 5.5 5.0 4.5 4.0 3.5 3.0 2.5 2.0 1.5 1.0 0.5  
f1 (ppm)

$^{13}\text{C}$  NMR ( $\text{CD}_2\text{Cl}_2$ )  
(298K)

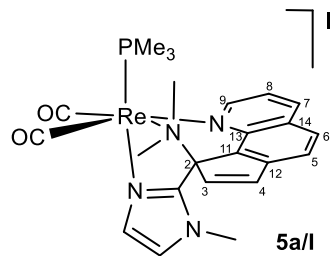

158.9  
156.8  
146.3  
144.5  
141.9  
141.3  
141.1  
139.2  
135.2  
134.1  
133.1  
131.2  
130.1  
128.7  
127.1  
126.0  
124.2  
122.2

81.1

55.7

53.8 CD<sub>2</sub>Cl<sub>2</sub>

45.7  
45.7

37.1

19.7  
19.4

220 210 200 190 180 170 160 150 140 130 120 110 100 90 80 70 60 50 40 30 20 10

f1 (ppm)

$^{31}\text{P}$  NMR ( $\text{CD}_2\text{Cl}_2$ )  
(298K)



-22.8

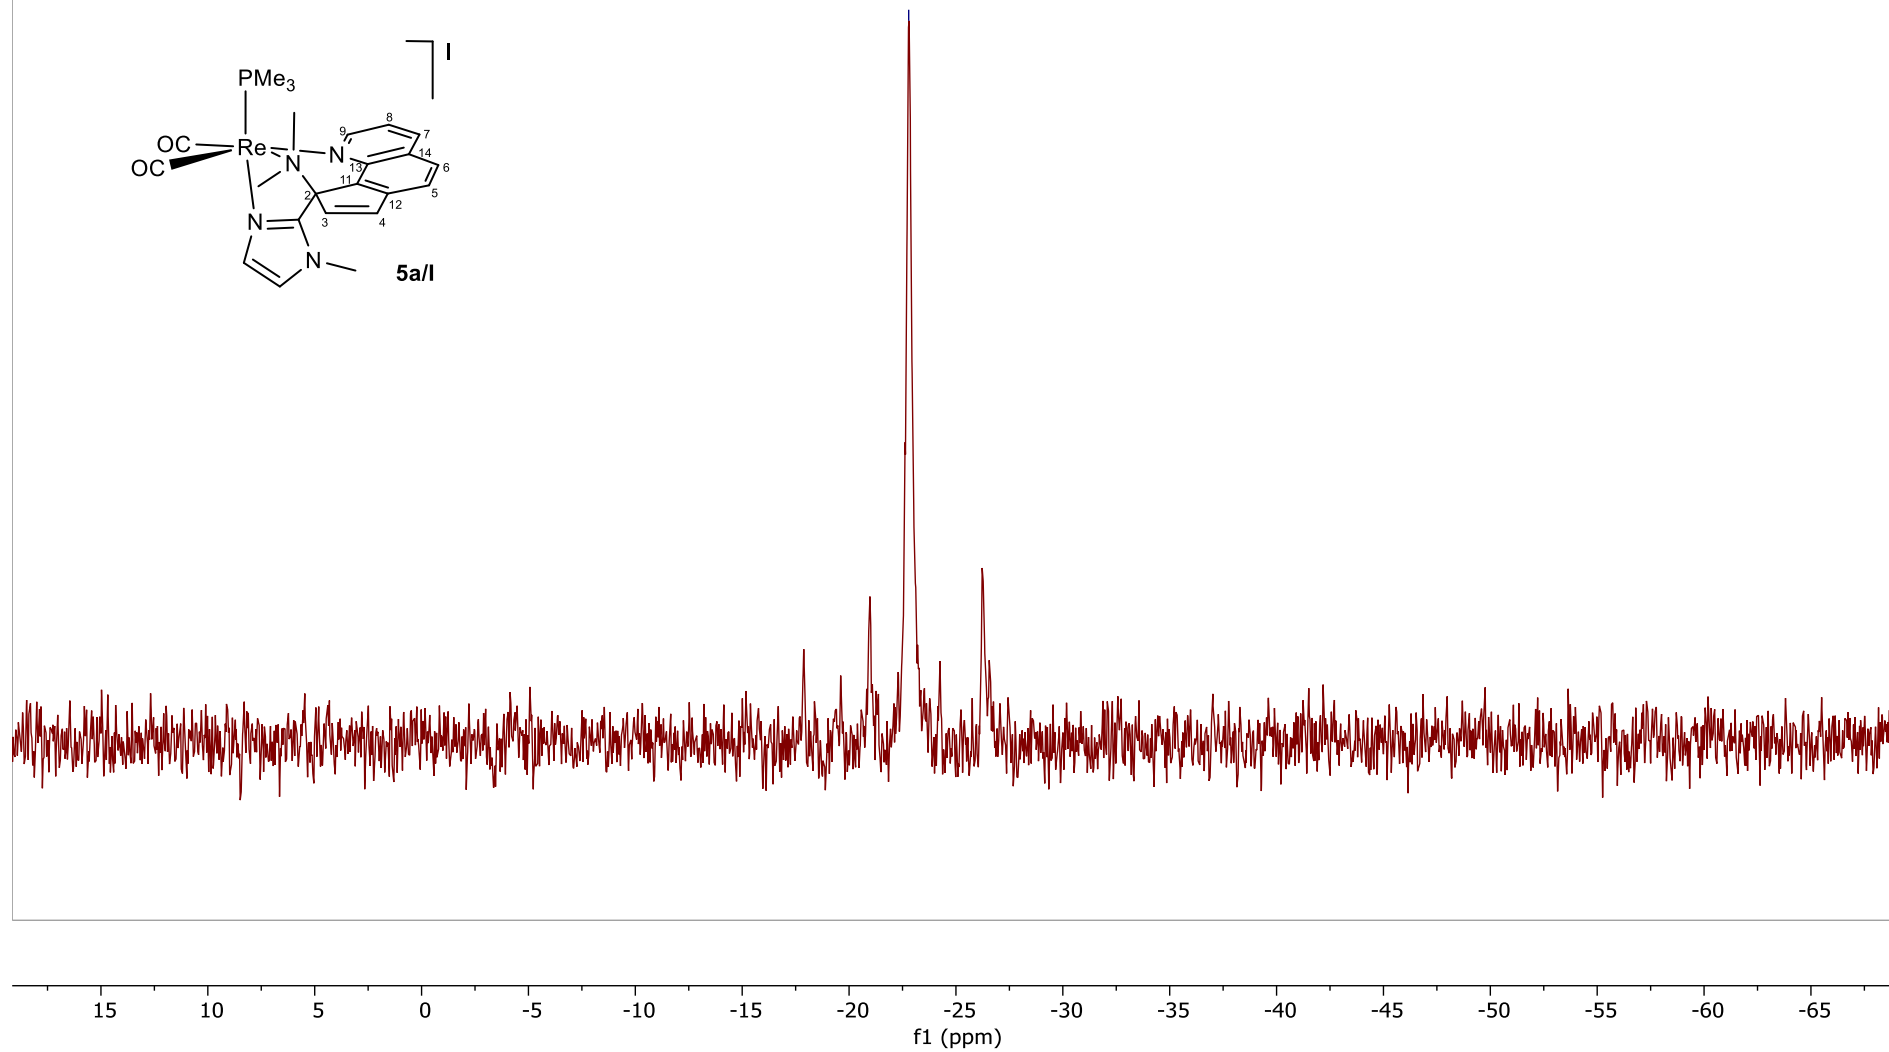

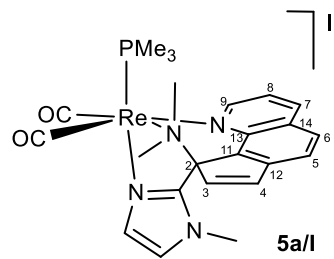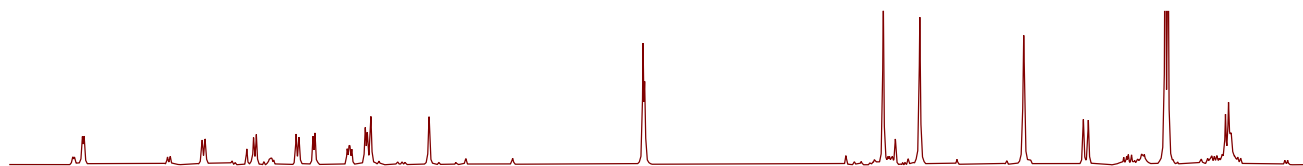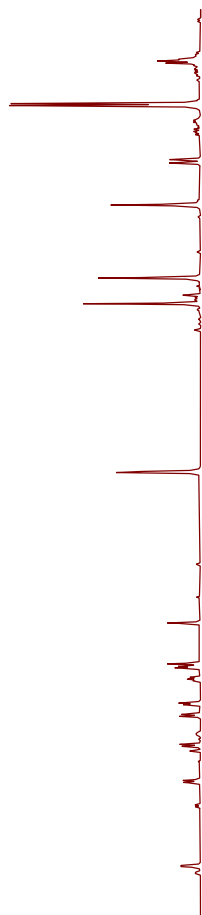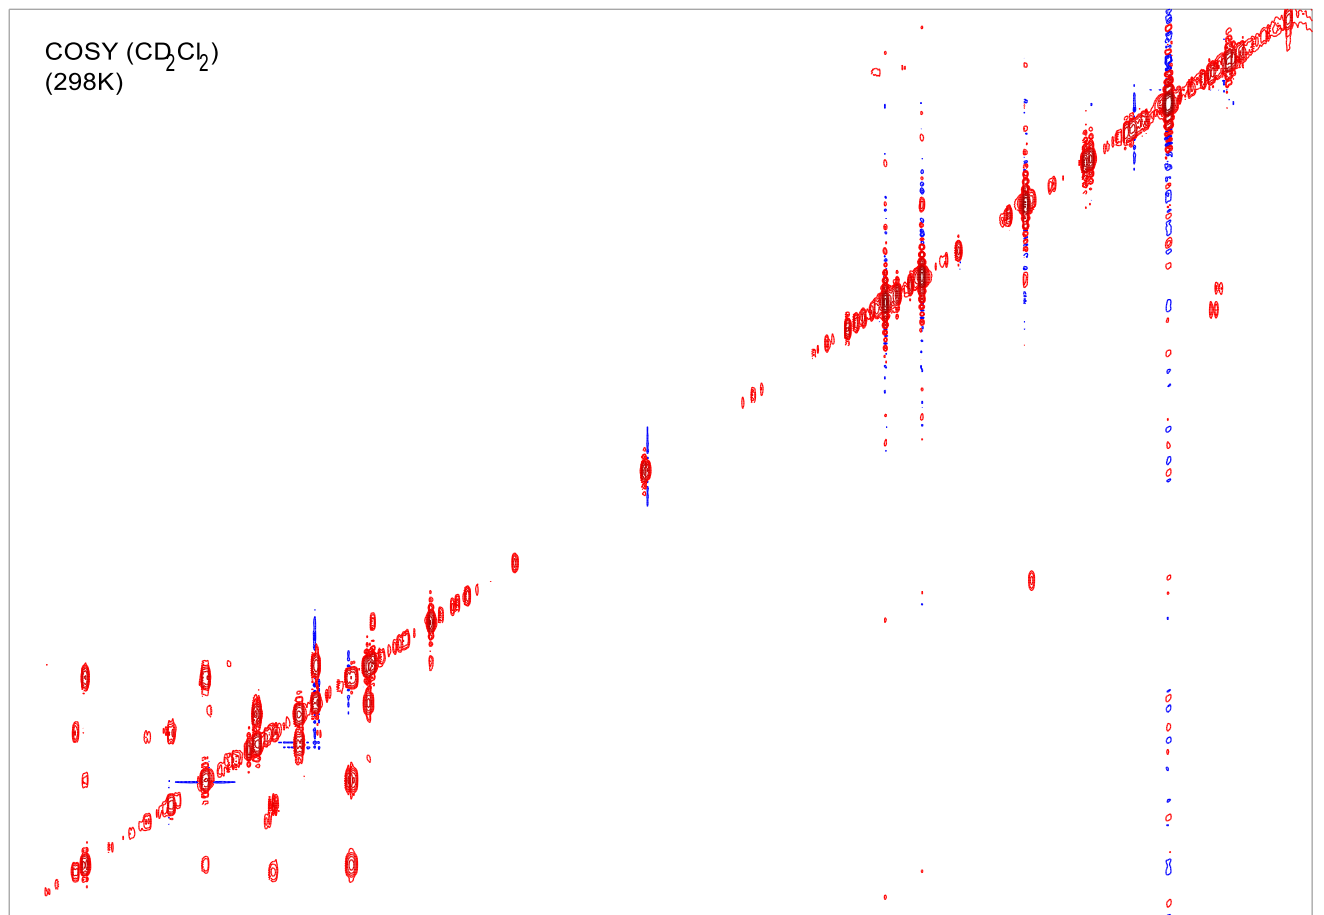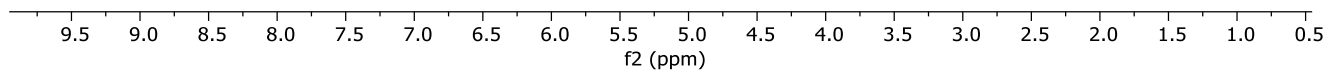



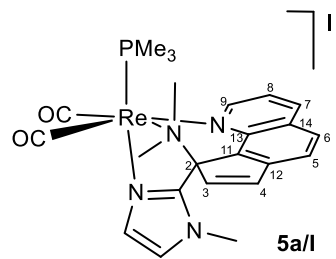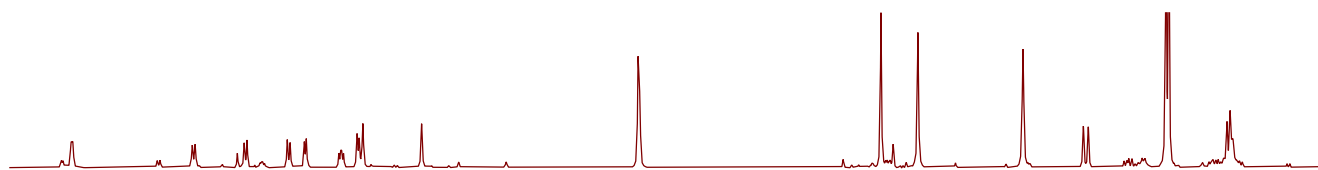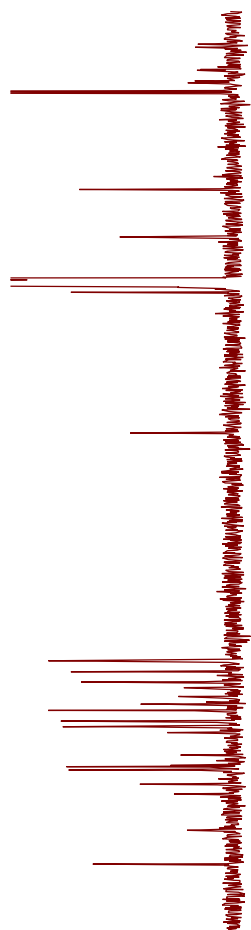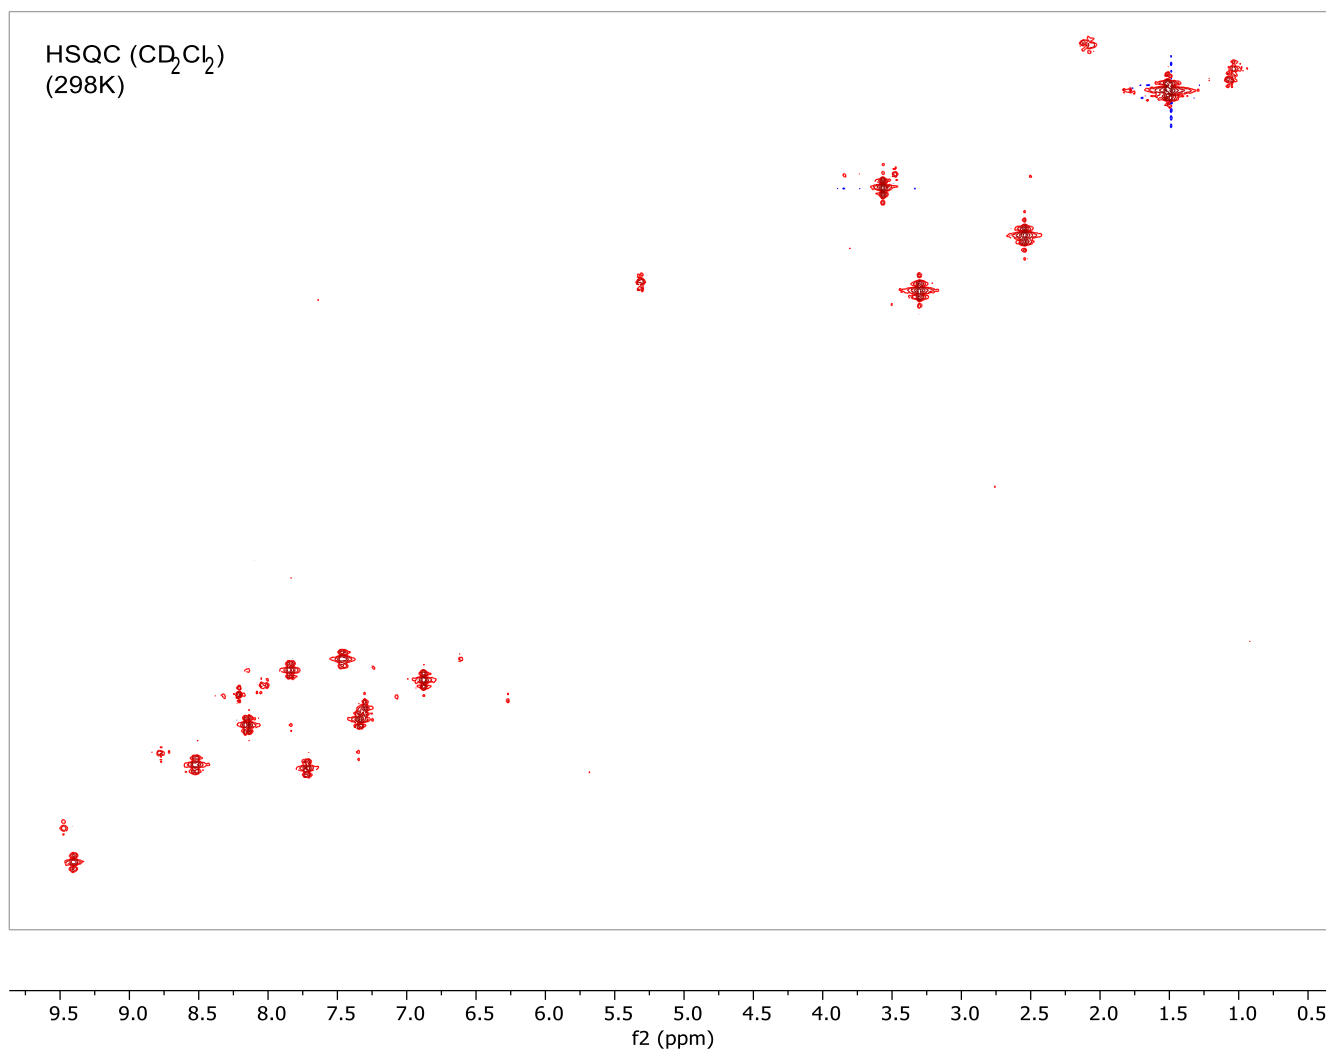

f1 (ppm)

f2 (ppm)

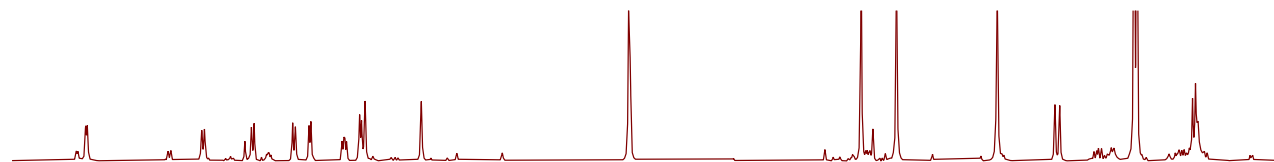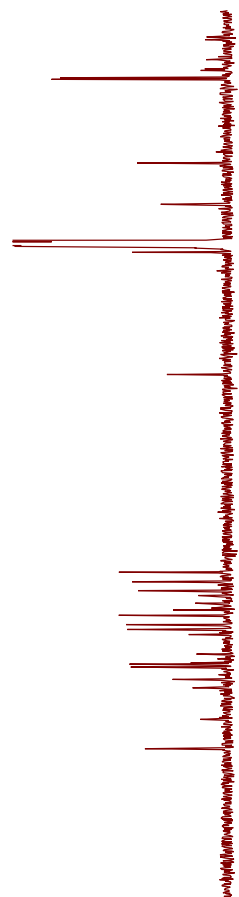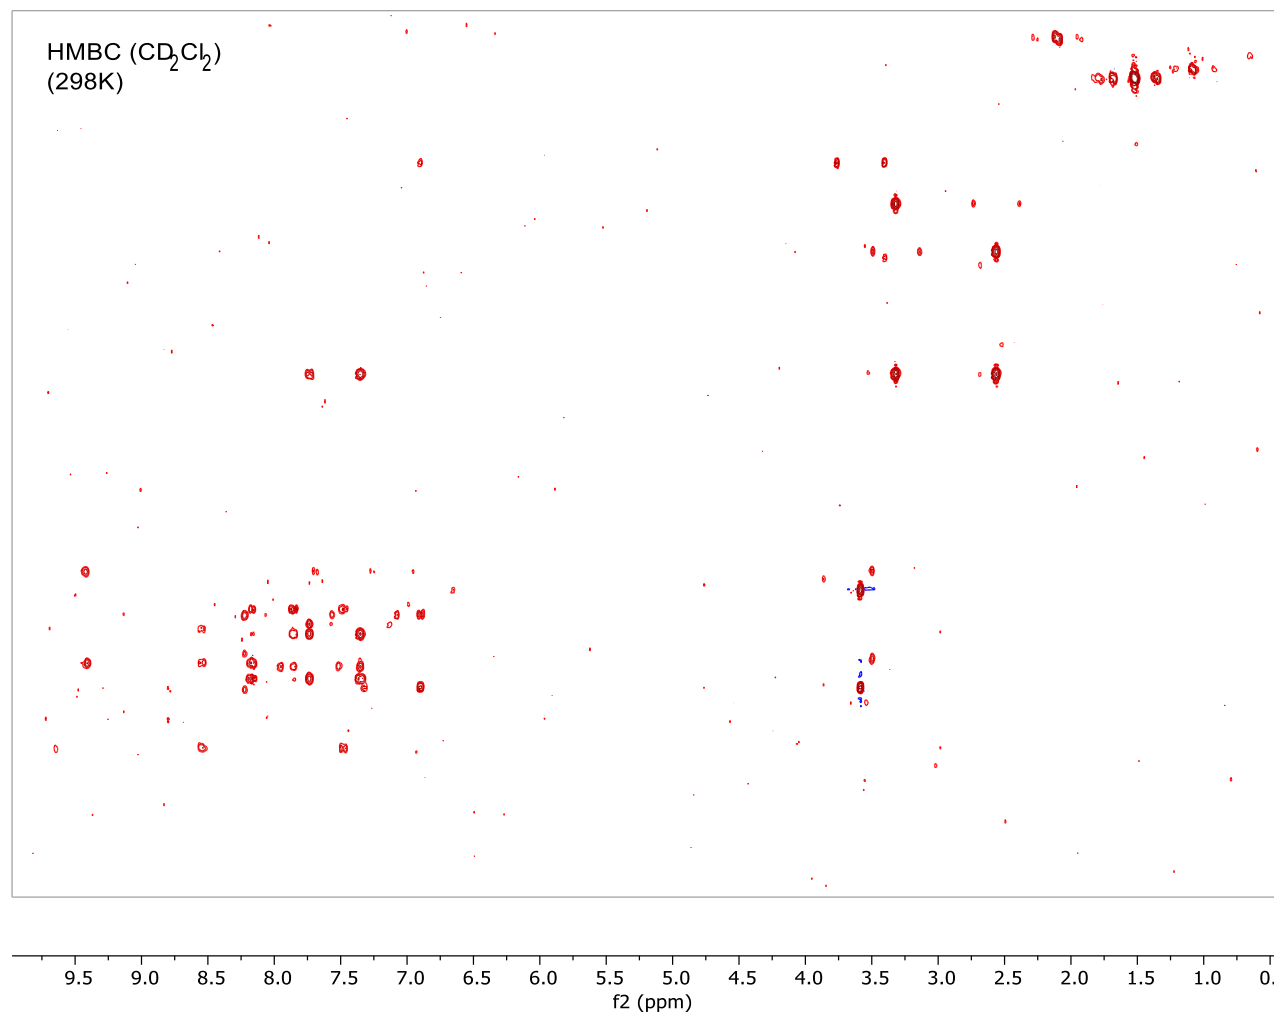

$^1\text{H}$  NMR ( $\text{CD}_2\text{Cl}_2$ )  
(298K)

9.48  
9.47  
8.55  
8.52  
8.15  
8.12  
7.66  
7.63  
7.57  
7.52  
7.51  
7.50  
7.48  
7.04  
6.85  
6.80  
6.78  
6.76  
6.24  
6.22

3.30  
2.51  
2.35  
2.13  
1.55  
1.53  
0.64

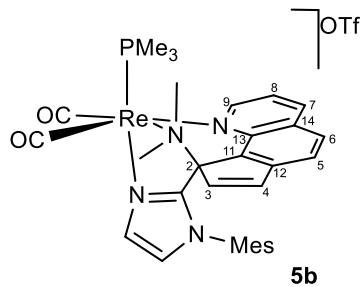

1.01  
1.02  
1.02  
0.97  
1.01  
1.10  
1.01  
0.97  
2.11  
1.05  
3.16  
3.12  
3.22  
3.13  
9.17  
4.33  
3.10

10.0 9.5 9.0 8.5 8.0 7.5 7.0 6.5 6.0 5.5 5.0 4.5 4.0 3.5 3.0 2.5 2.0 1.5 1.0 0.5

f1 (ppm)

$^{13}\text{C}$  NMR ( $\text{CD}_2\text{Cl}_2$ )  
(298K)

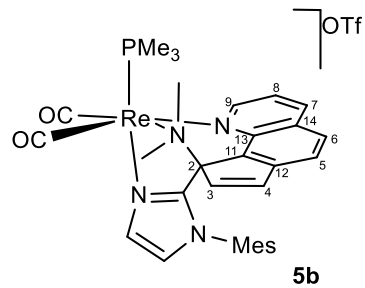

159.2  
145.1  
141.6  
141.4  
140.9  
139.8  
135.9  
134.5  
134.3  
132.7  
131.9  
130.4  
130.1  
129.9  
129.7  
129.5  
126.2  
124.8  
123.7  
122.3

80.7

55.1  
55.0  
55.0  
55.0  
55.0  
55.0

45.7

21.3  
19.7  
19.3  
18.0  
16.1

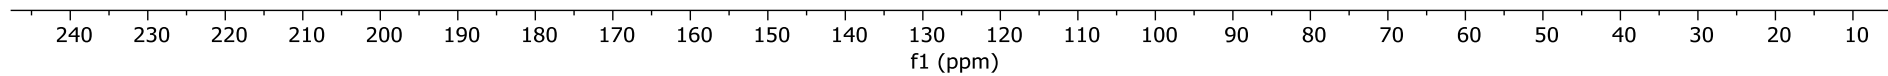

$^{31}\text{P}$  NMR ( $\text{CD}_2\text{Cl}_2$ )  
(298K)

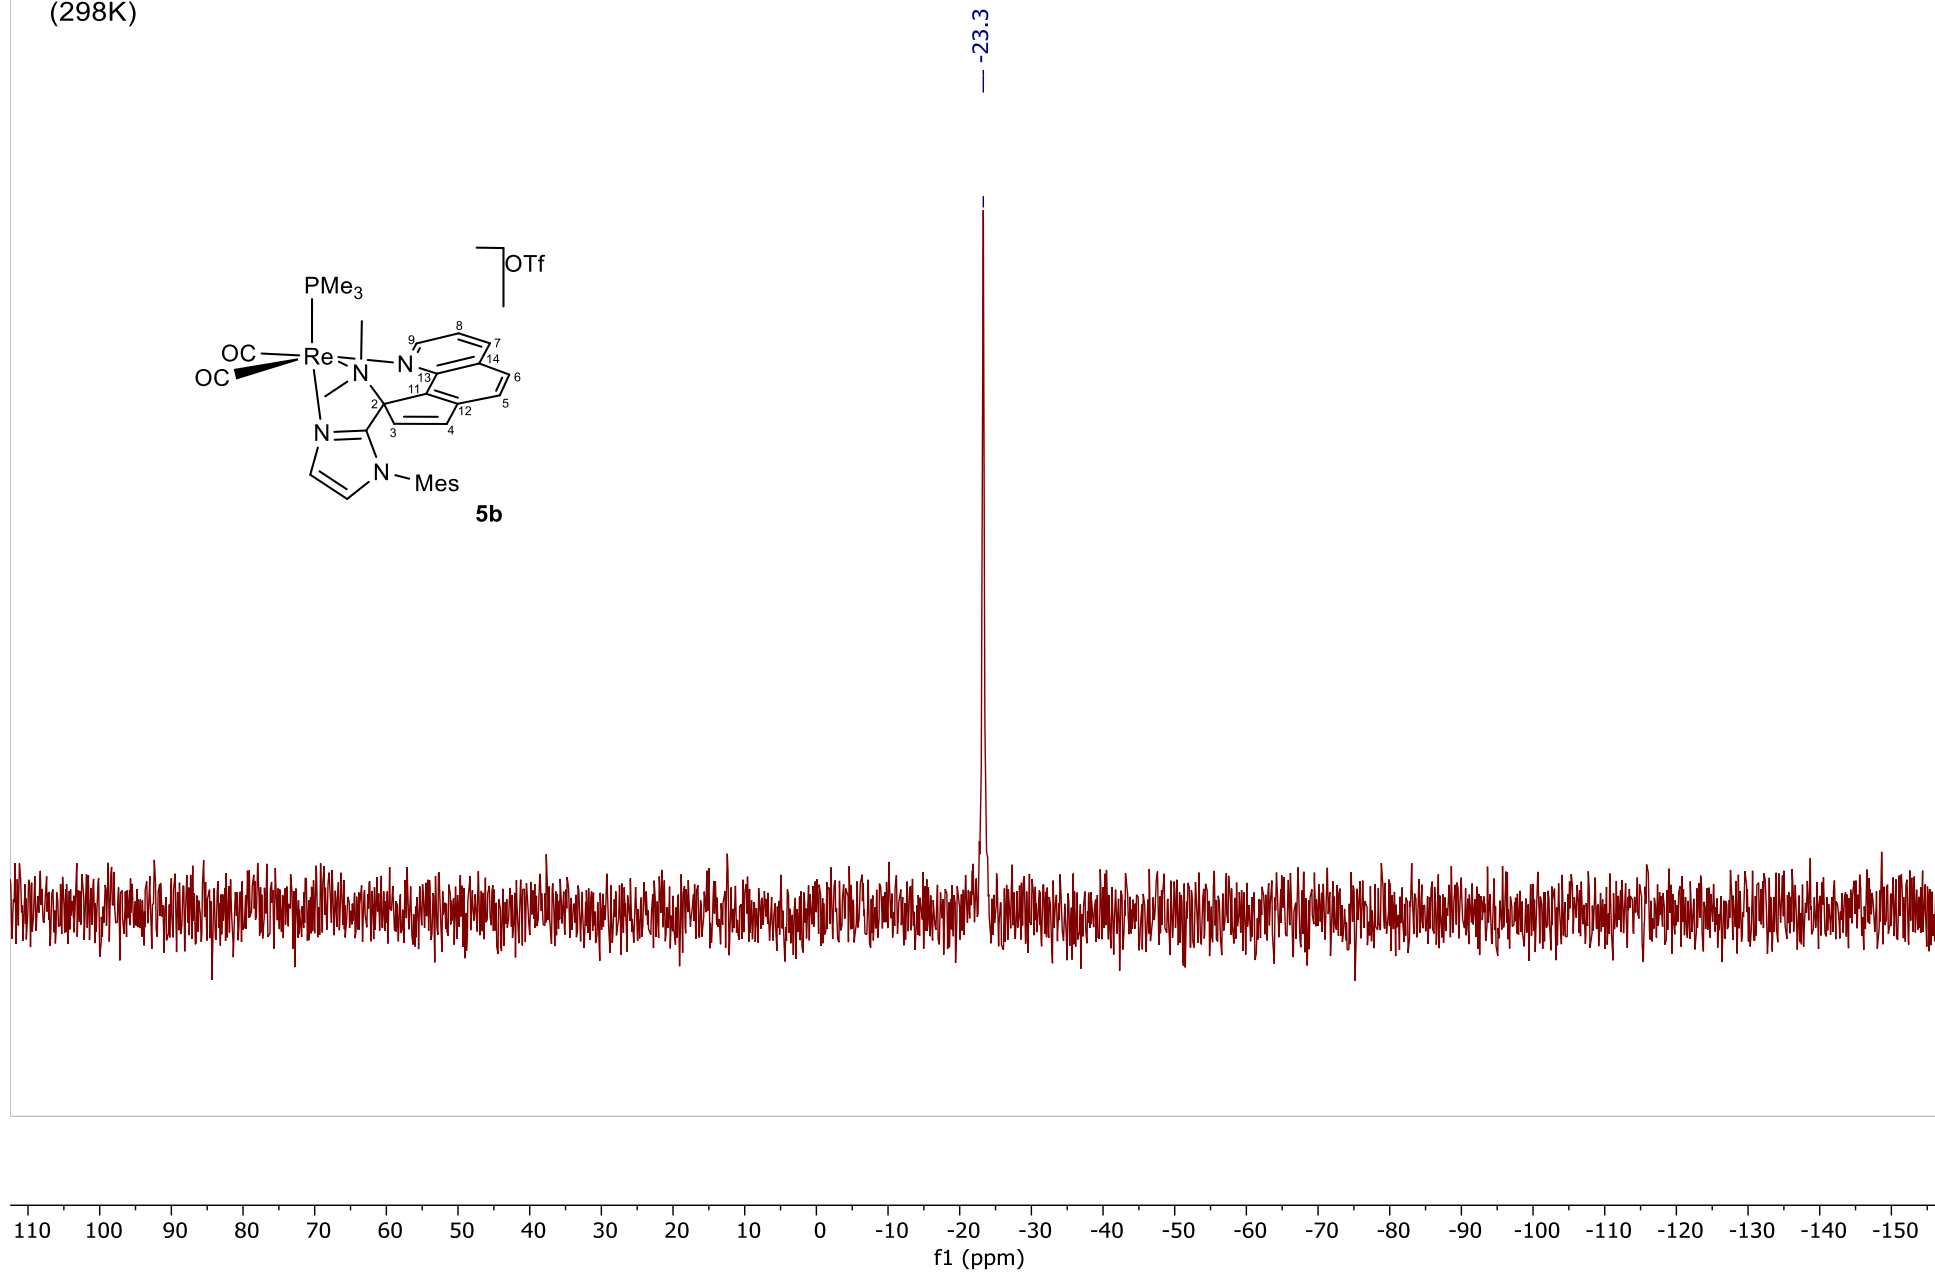

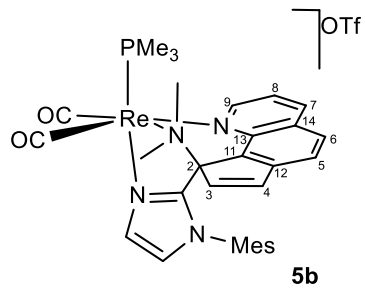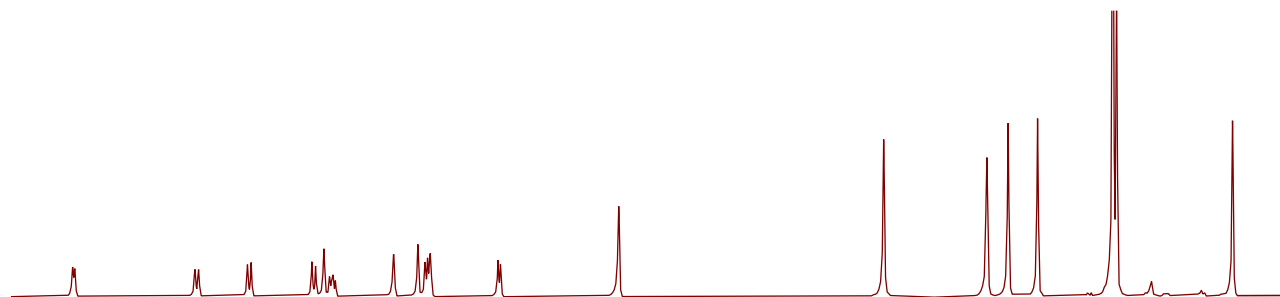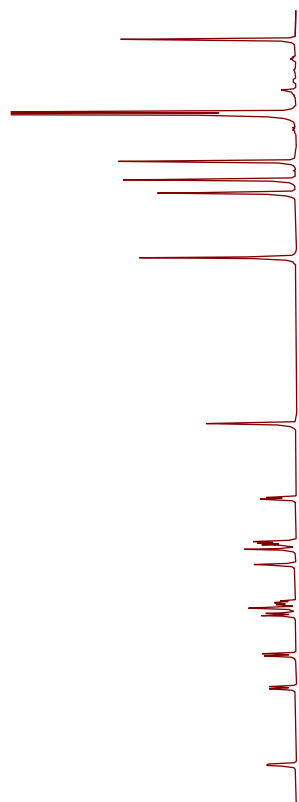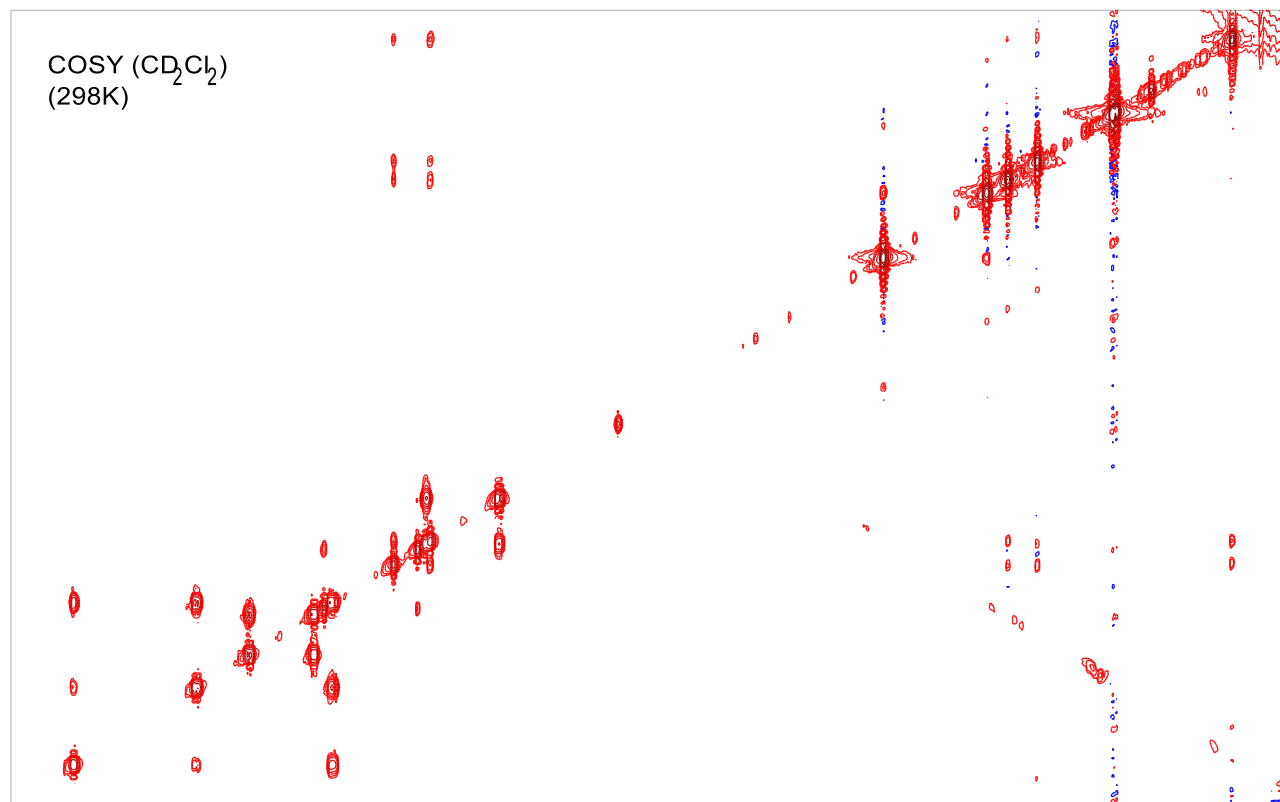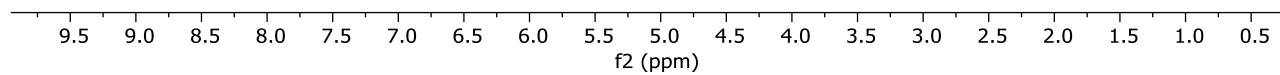



**5b**

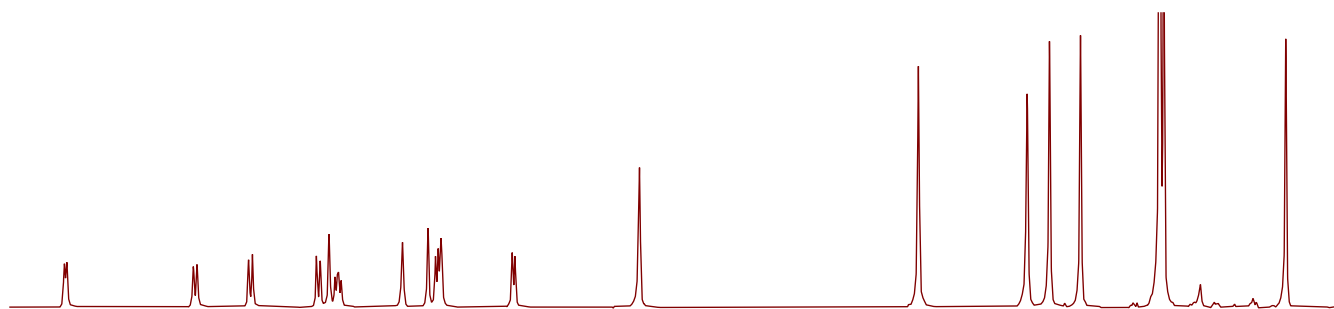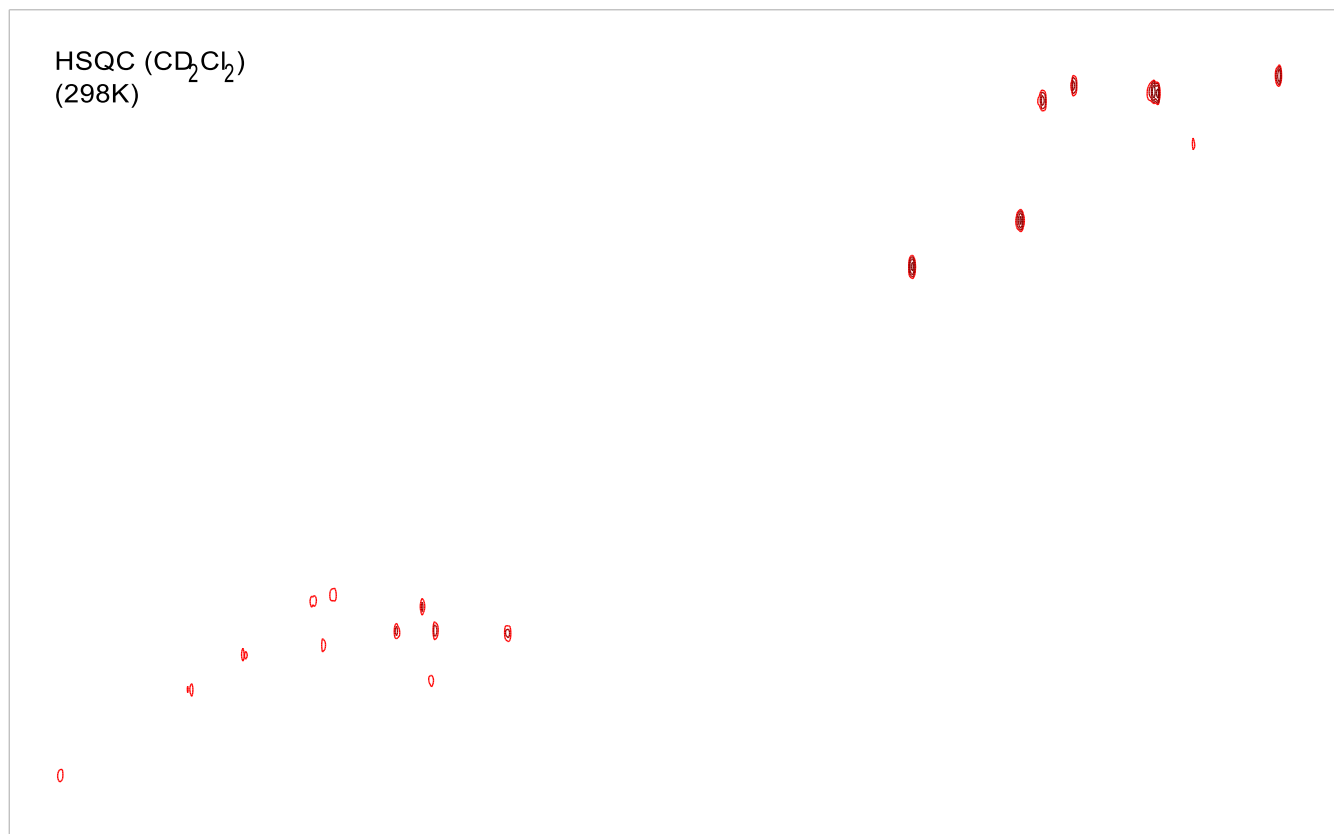

f1 (ppm)

f2 (ppm)

$^1\text{H}$  NMR ( $\text{CD}_2\text{Cl}_2$ )  
(298K)

— 5.32  $\text{CD}_2\text{Cl}_2$

9.49  
9.47  
8.60  
8.58  
8.19  
8.17  
7.67  
7.65  
7.56  
7.53  
7.39  
7.16  
7.04  
6.98  
6.91  
6.86  
6.81  
6.80  
6.76  
6.27  
6.25

— 3.32

2.53  
2.53  
2.35  
2.32  
2.13  
1.97  
1.56  
1.53

— 0.65

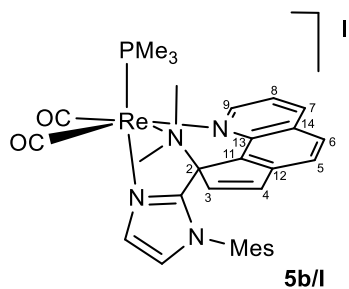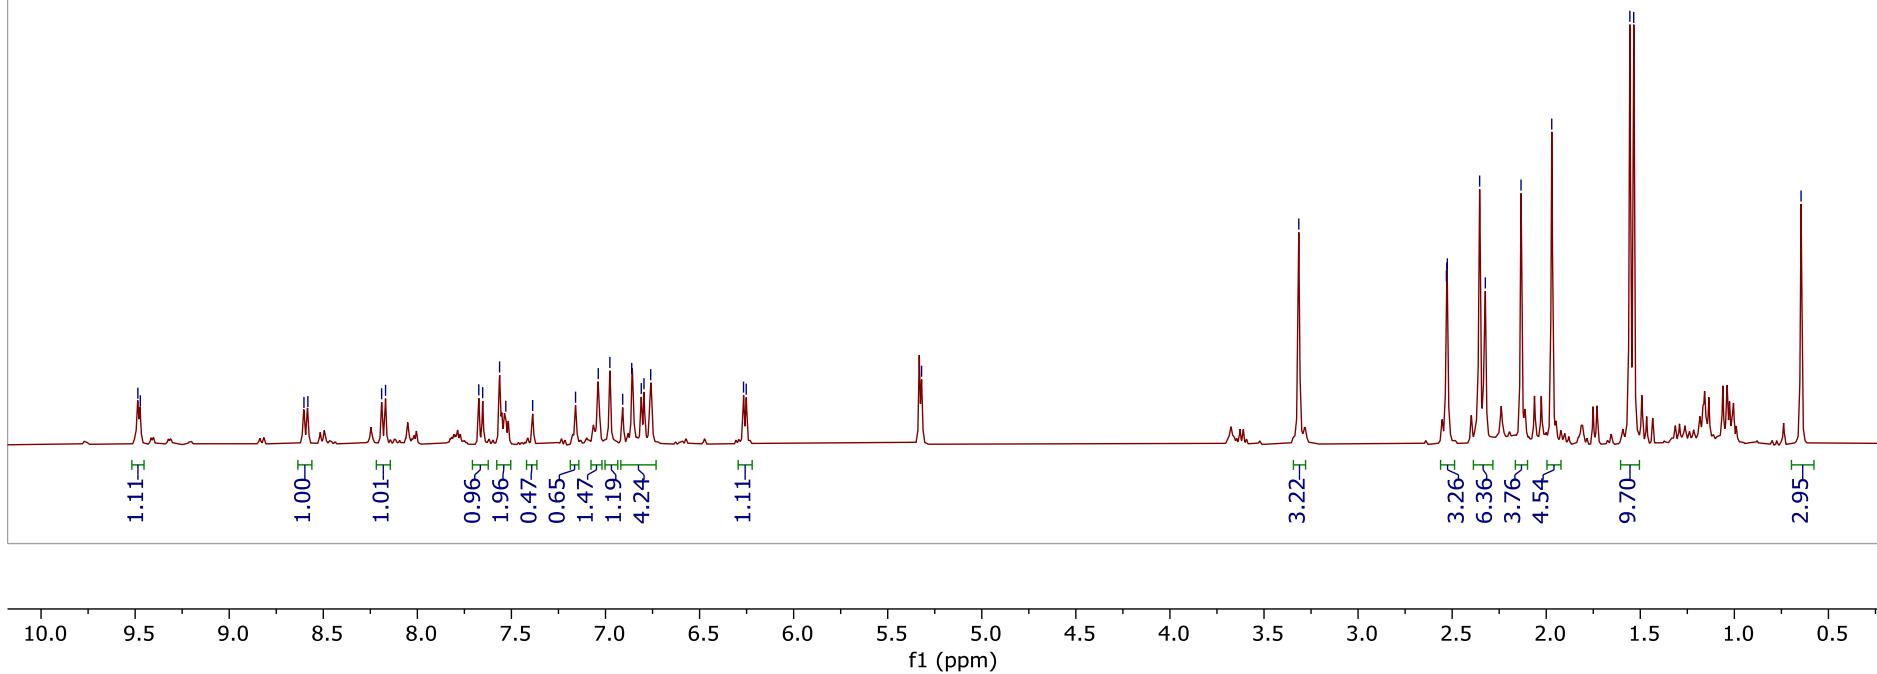



$^{13}\text{C}$  NMR ( $\text{CD}_2\text{Cl}_2$ )  
(298K)

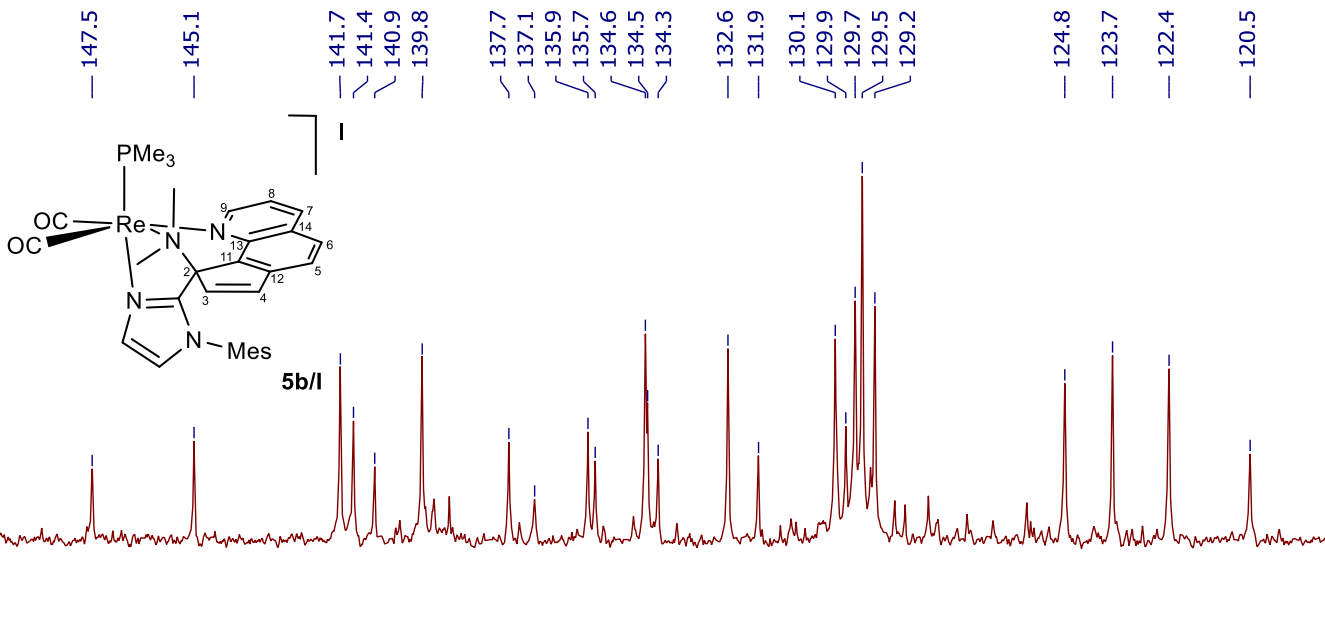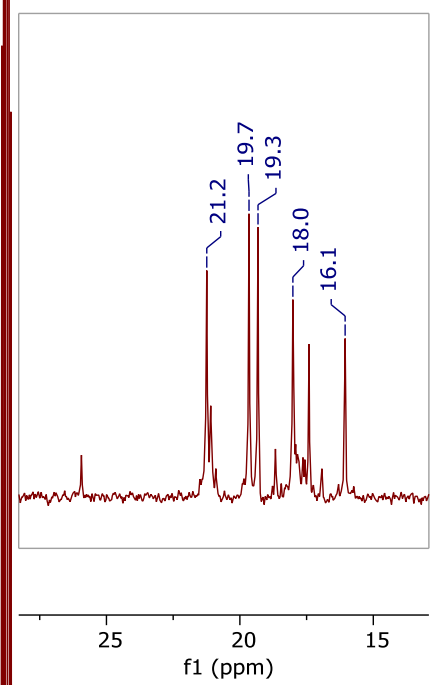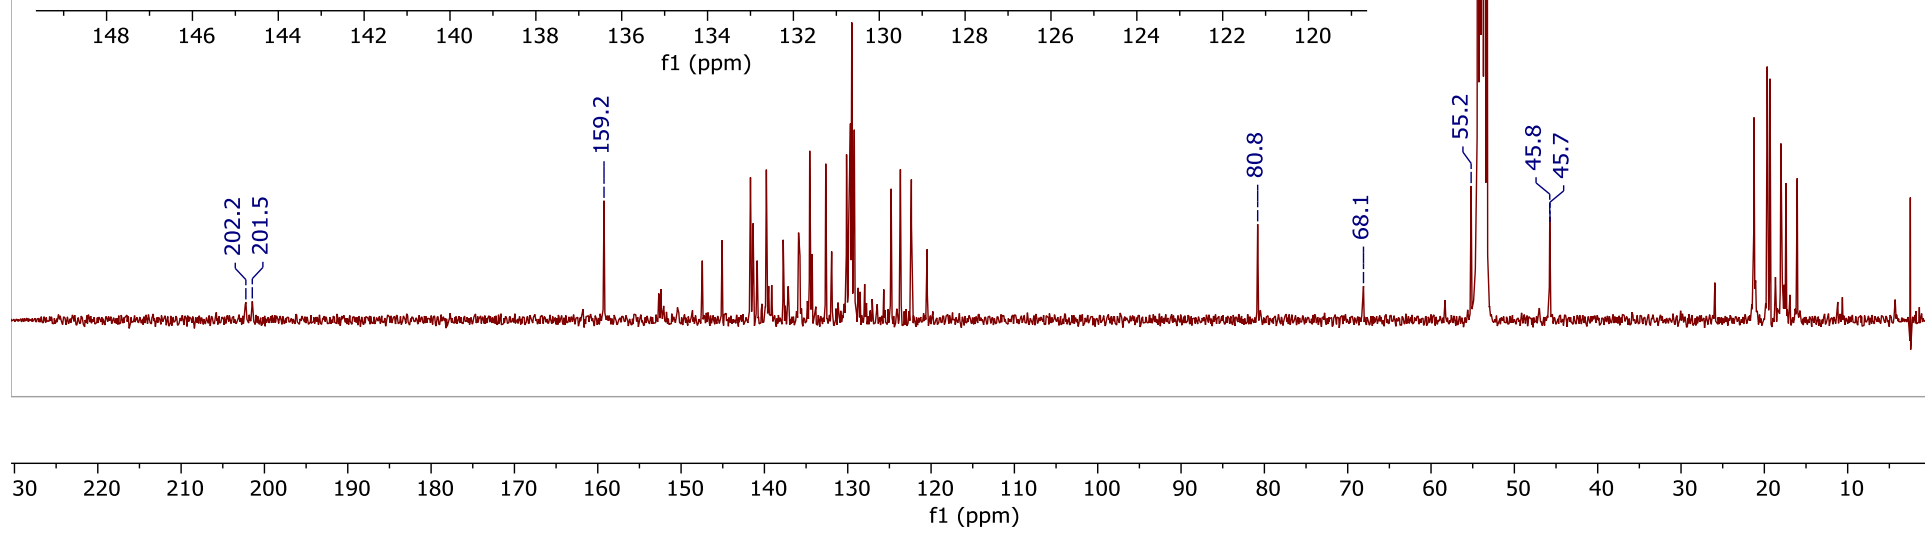

$^{31}\text{P}$  NMR ( $\text{CD}_2\text{Cl}_2$ )  
(298K)

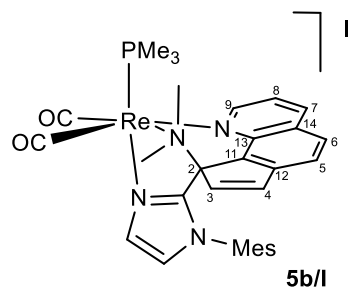

-23.4

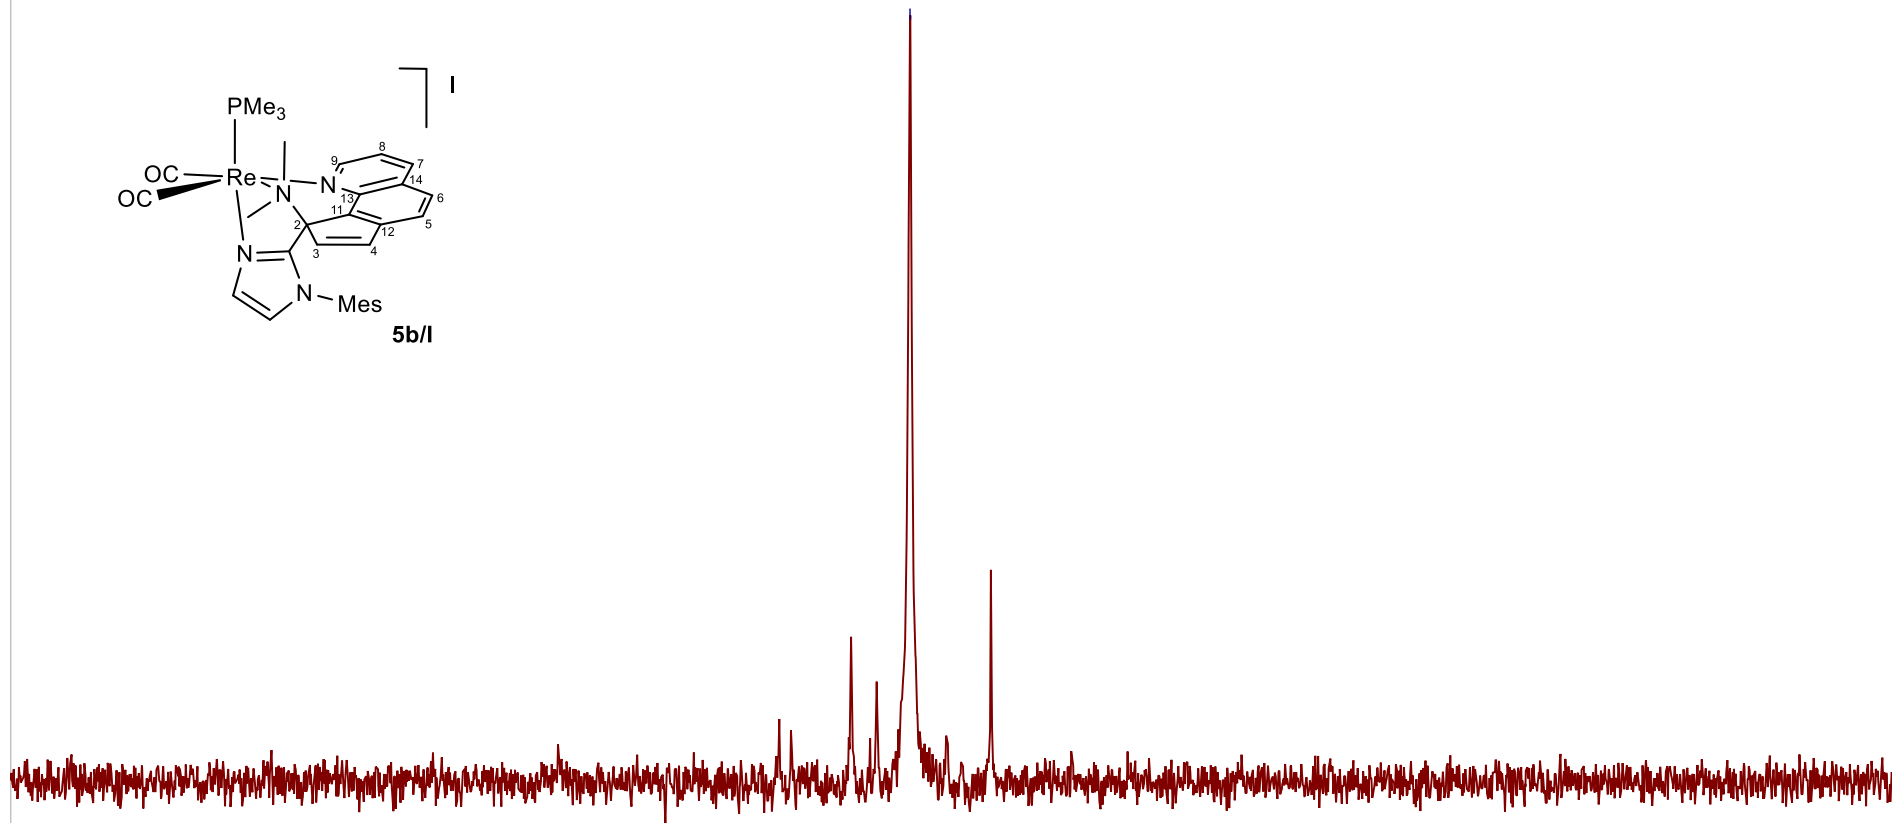

20 15 10 5 0 -5 -10 -15 -20 -25 -30 -35 -40 -45 -50 -55 -60 -65 -70  
f1 (ppm)

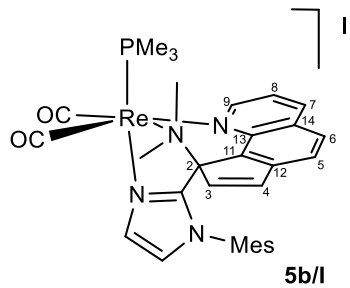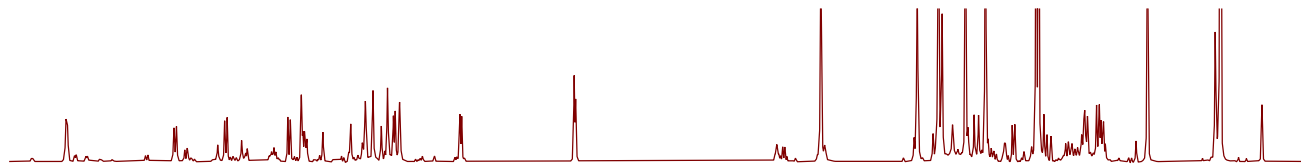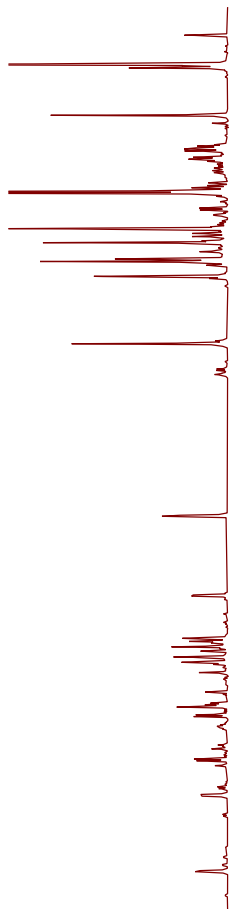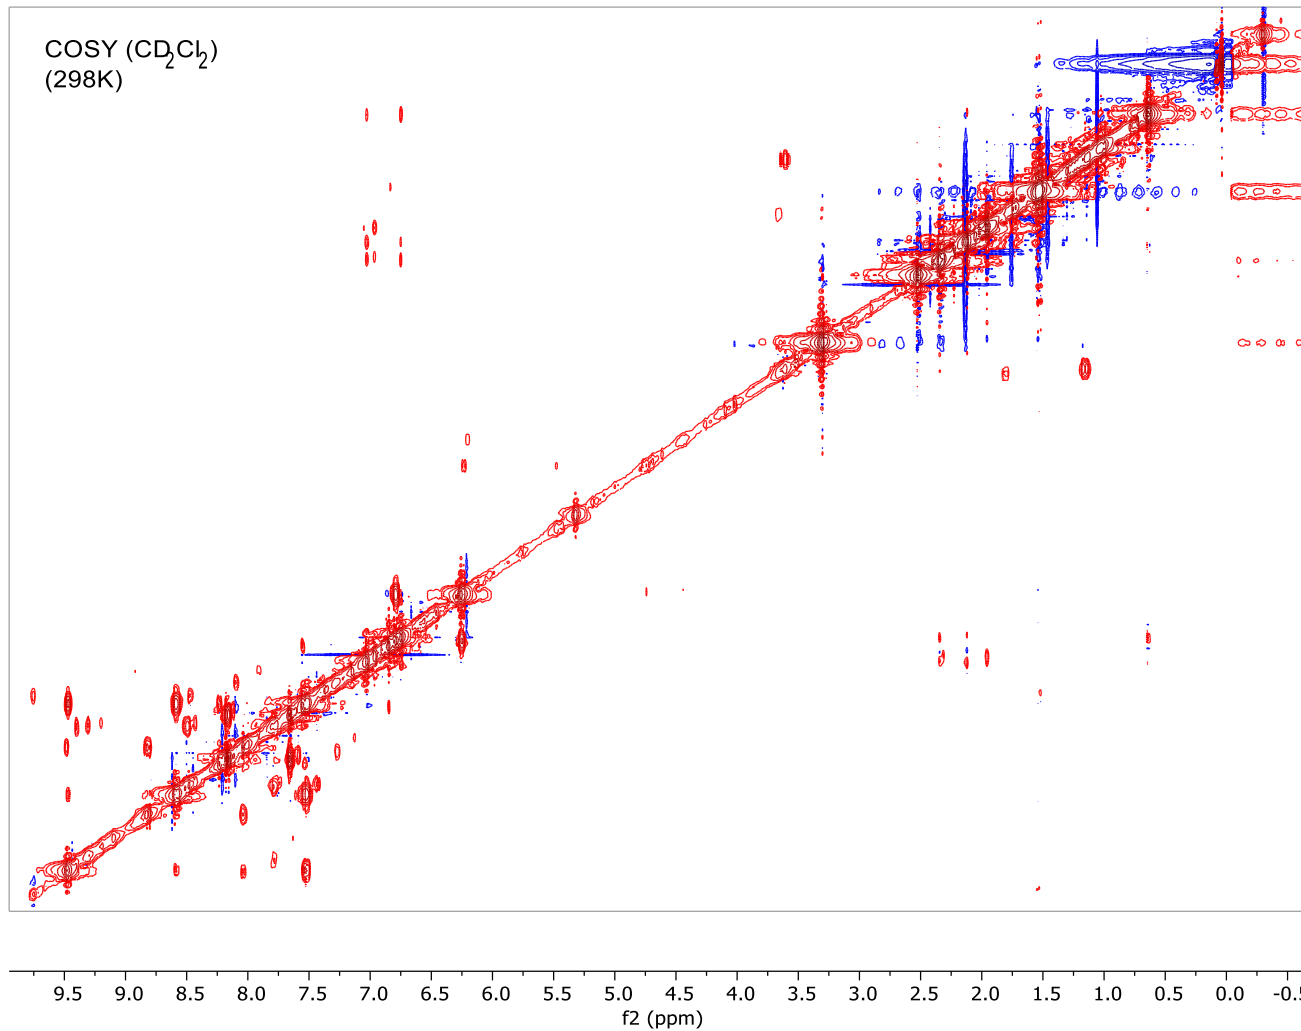

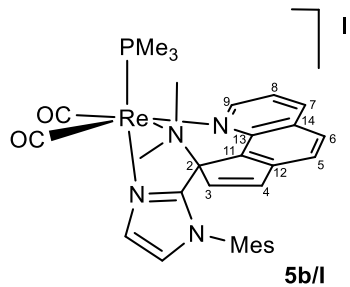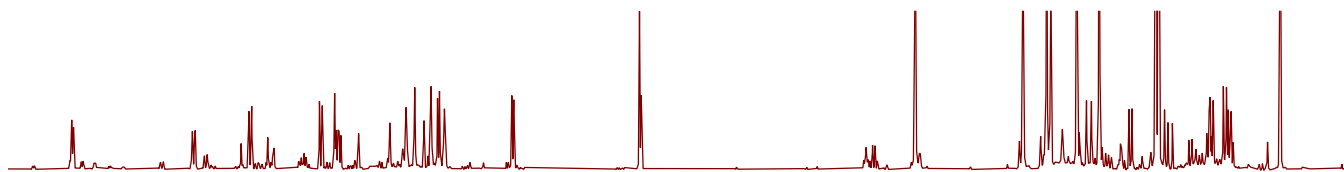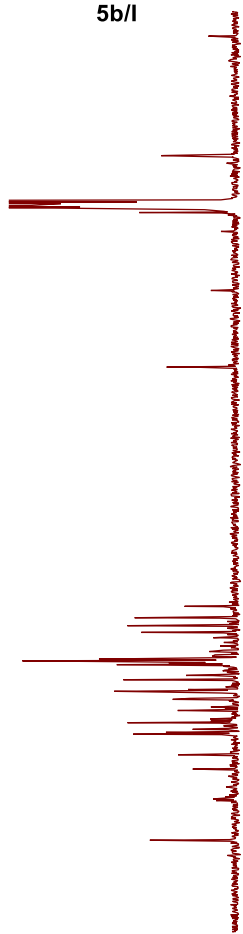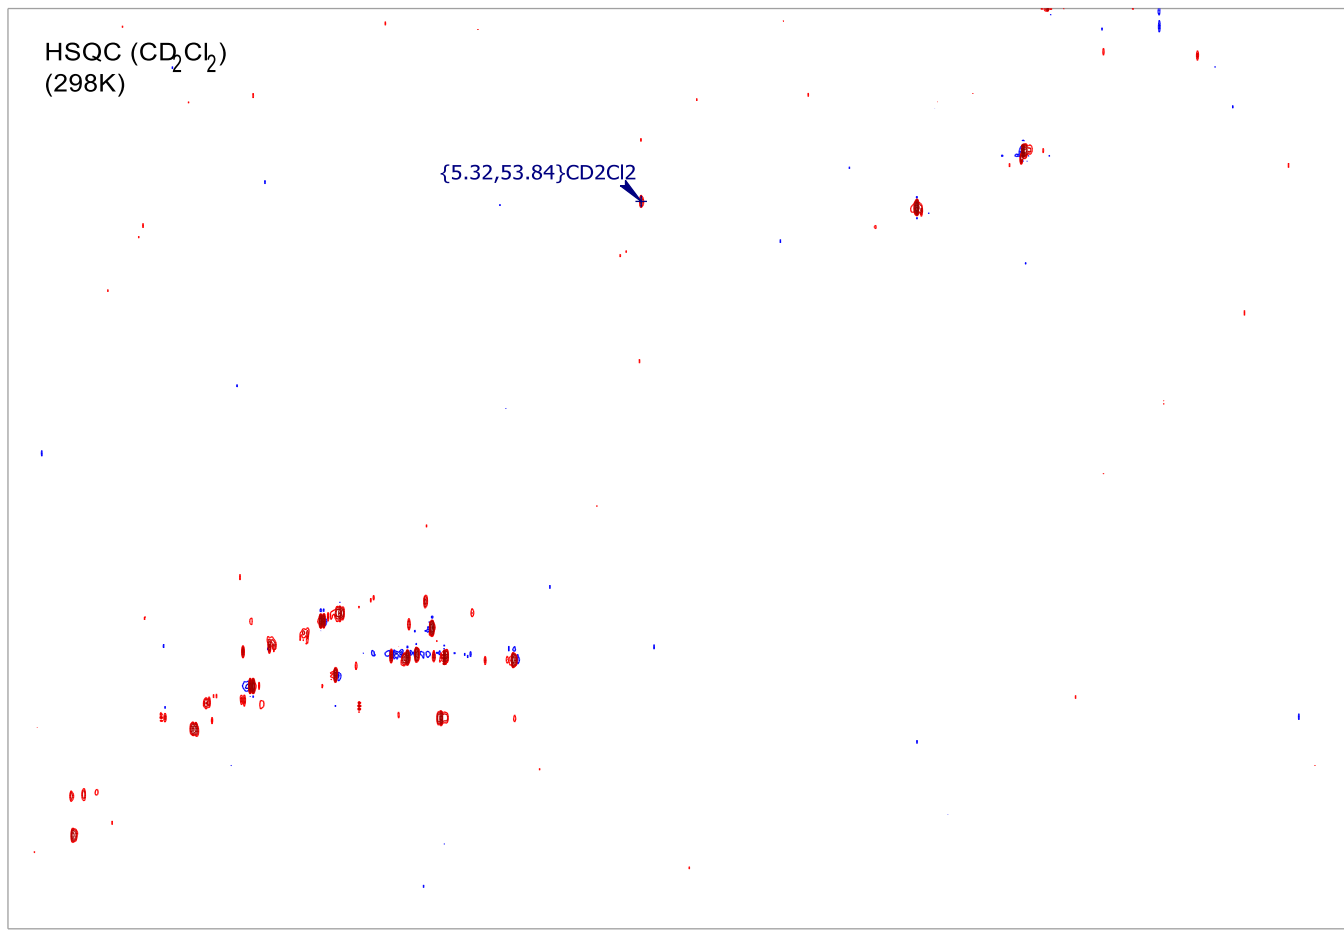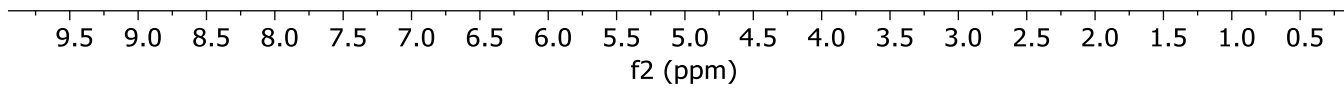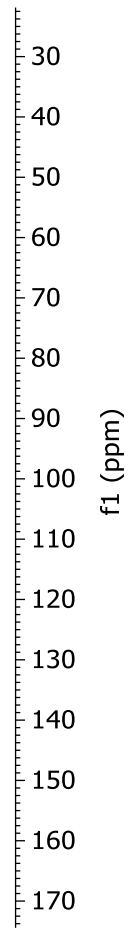

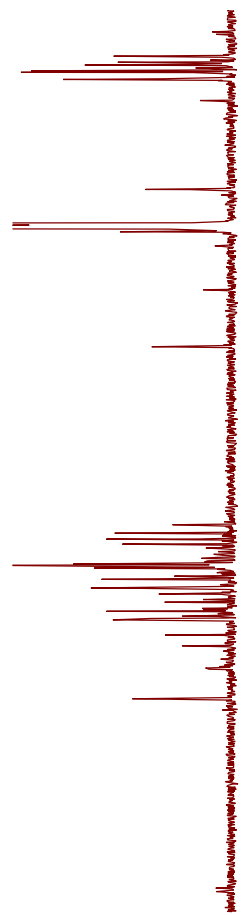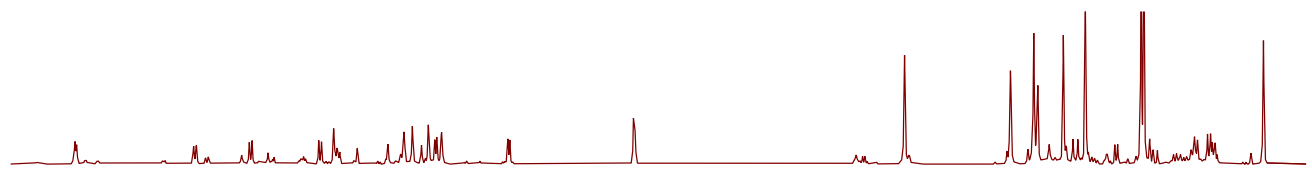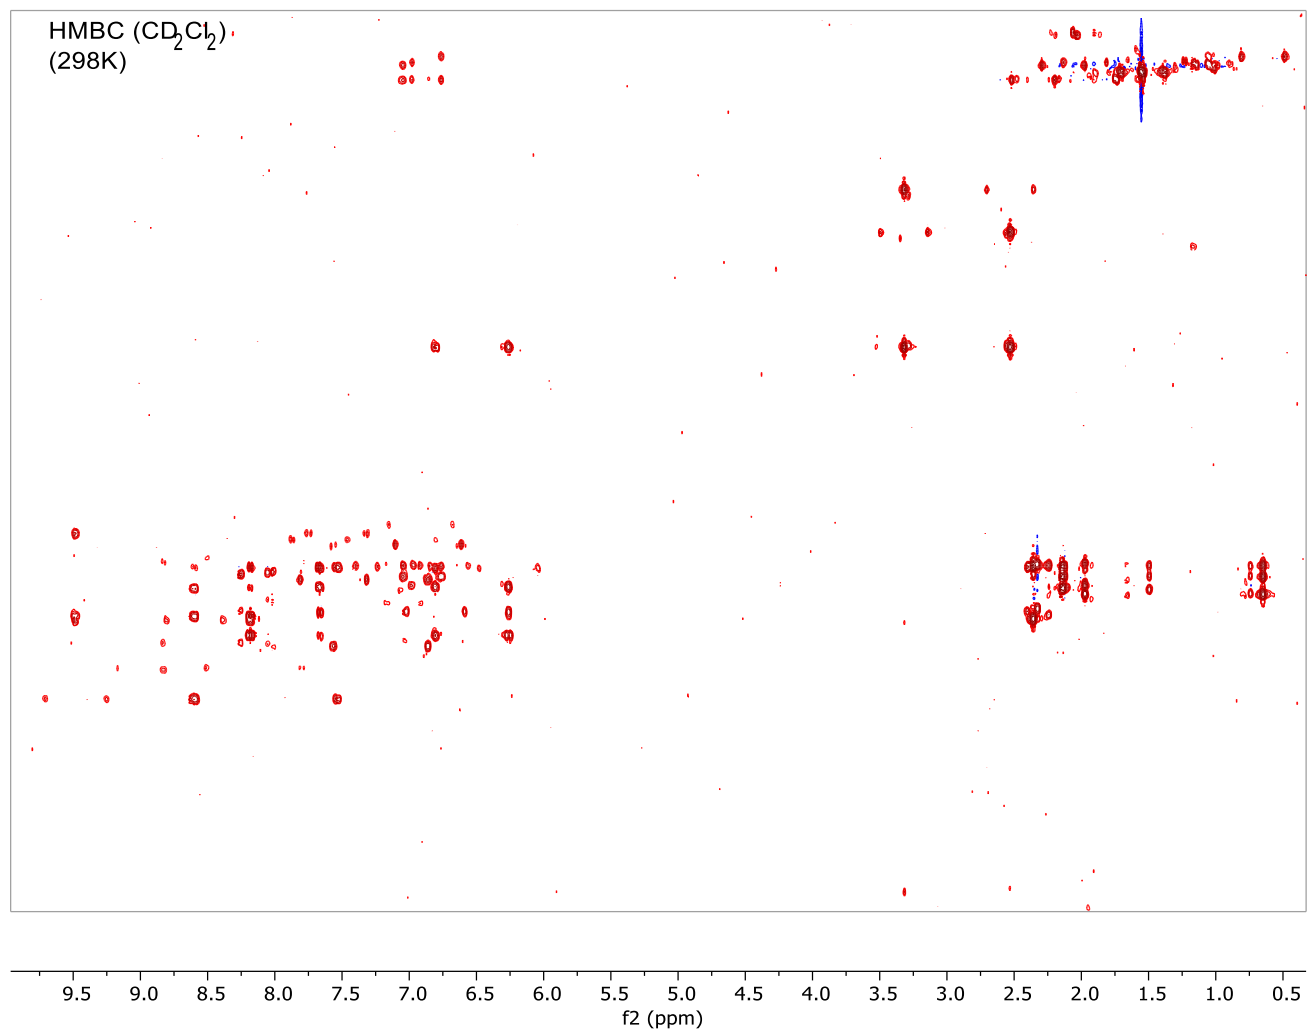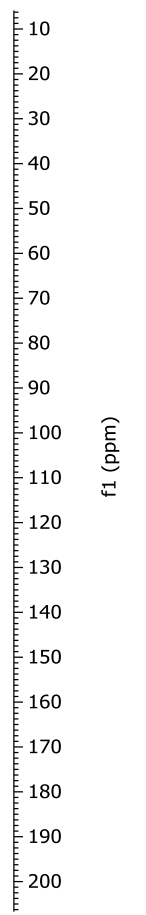

Supplement: d2qi01890j1.pdf [file d2qi01890j1.pdf]
